# Supplementary material for: Screening of Antibacterial and Antibiofilm Activities of Commercially Available Essential Oils' Different Samples in Comparison to Conventional Antibiotics
Source: Preprints.org preprint supplement (doi:10.20944/preprints202305.2139.v1), 2023-05-30
Supplement: Supplementary file 1 [file supplementary]

## Sheet: PCA Antibacterial activity
	S.a. ABE	S.a. ABfE	E.c. ABE	E.c. ABfE	P.a.ABE	P.a. ABfE
GEN	87.3	50.6	89.3	76.3	91.8	86.4
STR	88	48.3	89.1	72.9	92.8	81.9
AMC	96.8	72.9	96.9	82.4	91.4	87.7
OEO1	92.8	96.8	94	95.1	92	96
OEO2	90.4	94.2	89.8	95.6	91.4	96
EEO1	88.5	53.6	86.9	61.7	87.2	95.9
EEO2	87.8	47.3	85.7	52.3	87.9	96.1
REO1	88	40.3	85.8	49.2	86.5	94.9
REO2	88.1	49.2	84.9	30	87.5	95.5
CEO1	91.3	95.9	92.4	95.1	93.6	94.8
CEO2	84.8	81	78.1	82.2	67.8	43.9
CEO3	78.8	83.5	76.8	78.5	59.6	44.3
PEO1	87.5	91	79	34.2	86.7	74.6
PEO2	85.2	89.2	72.5	2.9	86.1	73.2
PEO3	79.7	32.1	72.7	3.1	86.1	79.9
PEO4	79.8	38.7	71.3	4.5	85	85.8
XLSTAT-Student 2022.2.1.1309 - Principal Component Analysis (PCA) - Start time: 19/05/2023 at 05:32:03 / End time: 19/05/2023 at 05:32:13 / Microsoft Excel 16.016327
Observations/variables table: Workbook = Data Analysis, PCA 19.05.2023.xlsx / Sheet = PCA S. aureus / Range = 'PCA S. aureus'!$B$1:$G$17 / 16 rows and 6 columns
Observation labels: Workbook = Data Analysis, PCA 19.05.2023.xlsx / Sheet = PCA S. aureus / Range = 'PCA S. aureus'!$A$1:$A$17 / 16 rows and 1 column
PCA type: Correlation
Standardisation: (n)
Type of biplot: Correlation biplot / Coefficient = Automatic
Bootstrap observations chart: Number of samples: 50
Seed (random numbers): 4559607
Summary statistics:
Variable	Observations	Obs. with missing data	Obs. without missing data	Minimum	Maximum	Mean	Std. deviation
S.a. ABE	16	0	16	78.8	96.8	87.175	4.80368
S.a. ABfE	16	0	16	32.1	96.8	66.5375	23.4755
E.c. ABE	16	0	16	71.3	96.9	84.075	8.05336
E.c. ABfE	16	0	16	2.9	95.6	57.25	33.3687
P.a.ABE	16	0	16	59.6	93.6	85.8375	9.19709
P.a. ABfE	16	0	16	43.9	96.1	82.9312	17.0459
Correlation matrix (Pearson (n)):
Variables	S.a. ABE	S.a. ABfE	E.c. ABE	E.c. ABfE	P.a.ABE	P.a. ABfE
S.a. ABE	1	0.359091	0.895058	0.572894	0.628318	0.562804
S.a. ABfE	0.359091	1	0.223405	0.499473	-0.119321	-0.245445
E.c. ABE	0.895058	0.223405	1	0.771889	0.543446	0.550465
E.c. ABfE	0.572894	0.499473	0.771889	1	0.00788109	0.0126143
P.a.ABE	0.628318	-0.119321	0.543446	0.00788109	1	0.877584
P.a. ABfE	0.562804	-0.245445	0.550465	0.0126143	0.877584	1
Values in bold are different from 0 with a significance level alpha=0,05
Principal Component Analysis:
Eigenvalues:
	F1	F2	F3	F4	F5	F6
Eigenvalue	3.29762	1.83401	0.58233	0.169168	0.102809	0.0140569
Variability (%)	54.9604	30.5669	9.7055	2.81946	1.71348	0.234281
Cumulative %	54.9604	85.5273	95.2328	98.0522	99.7657	100
Eigenvectors:
	F1	F2	F3	F4	F5	F6
S.a. ABE	0.518669	0.0855693	0.123043	-0.704042	-0.206728	-0.412443
S.a. ABfE	0.14192	0.569533	0.750659	0.233688	-0.0941922	0.168878
E.c. ABE	0.521337	0.122936	-0.336468	-0.101179	-0.0277993	0.767382
E.c. ABfE	0.338897	0.50253	-0.452867	0.43048	0.210355	-0.444929
P.a.ABE	0.40989	-0.425383	0.311379	0.107919	0.735767	-0.0329085
P.a. ABfE	0.395208	-0.468732	0.0781996	0.492461	-0.601678	-0.115979
Factor loadings:
	F1	F2	F3	F4	F5	F6
S.a. ABE	0.941869	0.115883	0.0938944	-0.289573	-0.0662847	-0.0489
S.a. ABfE	0.257717	0.771294	0.572832	0.096116	-0.0302016	0.0200225
E.c. ABE	0.946714	0.166487	-0.25676	-0.0416148	-0.00891349	0.0909821
E.c. ABfE	0.615414	0.680555	-0.345585	0.177057	0.0674477	-0.0527516
P.a.ABE	0.744333	-0.576078	0.237615	0.0443871	0.235915	-0.00390169
P.a. ABfE	0.717673	-0.634784	0.0596746	0.202549	-0.192921	-0.0137507
Correlations between variables and factors:
	F1	F2	F3	F4	F5	F6
S.a. ABE	0.941869	0.115883	0.0938944	-0.289573	-0.0662847	-0.0489
S.a. ABfE	0.257717	0.771294	0.572832	0.096116	-0.0302016	0.0200225
E.c. ABE	0.946714	0.166487	-0.25676	-0.0416148	-0.00891349	0.0909821
E.c. ABfE	0.615414	0.680555	-0.345585	0.177057	0.0674477	-0.0527516
P.a.ABE	0.744333	-0.576078	0.237615	0.0443871	0.235915	-0.00390169
P.a. ABfE	0.717673	-0.634784	0.0596746	0.202549	-0.192921	-0.0137507
Contribution of the variables (%):
	F1	F2	F3	F4	F5	F6
S.a. ABE	26.9017	0.732211	1.51395	49.5675	4.27363	17.011
S.a. ABfE	2.01412	32.4367	56.3489	5.46101	0.887218	2.85199
E.c. ABE	27.1792	1.51134	11.321	1.02371	0.0772798	58.8875
E.c. ABfE	11.4851	25.2536	20.5089	18.5313	4.42492	19.7962
P.a.ABE	16.8009	18.0951	9.69571	1.16465	54.1353	0.108297
P.a. ABfE	15.619	21.971	0.611518	24.2518	36.2016	1.34512
Squared cosines of the variables:
	F1	F2	F3	F4	F5	F6
S.a. ABE	0.887118	0.0134288	0.00881617	0.0838523	0.00439366	0.00239121
S.a. ABfE	0.0664181	0.594894	0.328137	0.00923828	0.000912136	0.0004009
E.c. ABE	0.896267	0.0277181	0.0659259	0.00173179	7.94503e-05	0.00827774
E.c. ABfE	0.378735	0.463155	0.119429	0.0313491	0.00454919	0.00278273
P.a.ABE	0.554032	0.331866	0.0564611	0.00197021	0.0556558	1.52231e-05
P.a. ABfE	0.515054	0.402951	0.00356105	0.0410262	0.0372184	0.000189082
Values in bold correspond for each variable to the factor for which the squared cosine is the largest
Factor scores:
	F1	F2	F3	F4	F5	F6
GEN	0.821092	-0.401693	-0.790581	0.179005	0.532079	0.0759602
STR	0.774031	-0.422449	-0.778088	-0.115457	0.735746	0.0518642
AMC	2.60454	0.528726	-0.224078	-1.01314	-0.0503943	0.0554954
OEO1	2.47339	0.941414	0.466829	0.299822	-0.131626	0.0669401
OEO2	1.88634	0.802335	0.470716	0.690267	-0.0455255	-0.157554
EEO1	0.675785	-0.619435	-0.467393	0.0925294	-0.34658	-0.0930516
EEO2	0.41657	-0.994411	-0.485007	0.0384955	-0.295737	-0.0704252
REO1	0.276162	-1.11181	-0.726393	-0.159119	-0.368086	-0.0740309
REO2	0.141713	-1.2646	-0.0840603	-0.296872	-0.470458	0.151147
CEO1	2.23844	0.823692	0.516726	0.52197	0.120421	0.0383273
CEO2	-2.07718	2.58267	-0.492743	-0.465047	0.161935	-0.272609
CEO3	-3.22424	2.83722	-0.745781	0.349004	-0.293295	0.228529
PEO1	-0.551897	0.3758	1.34923	-0.277092	0.127184	0.0262673
PEO2	-1.64365	-0.232507	1.92052	-0.329185	0.0577214	0.0202572
PEO3	-2.43759	-1.94843	-0.0903907	0.116285	0.295138	0.0535832
PEO4	-2.3735	-1.89653	0.160497	0.368533	-0.0285218	-0.100699
Contribution of the observations (%):
	F1	F2	F3	F4	F5	F6
GEN	1.2778	0.549878	6.70816	1.18383	17.2109	2.56545
STR	1.13552	0.608172	6.49783	0.492497	32.9083	1.19598
AMC	12.857	0.952663	0.538902	37.9227	0.154388	1.36932
OEO1	11.5948	3.02022	2.33898	3.32116	1.05326	1.99234
OEO2	6.74405	2.19376	2.37809	17.6034	0.125997	11.037
EEO1	0.865557	1.30758	2.34463	0.316316	7.30227	3.8498
EEO2	0.328894	3.36984	2.52468	0.0547497	5.31696	2.20519
REO1	0.144546	4.21249	5.66309	0.935413	8.23661	2.43679
REO2	0.0380628	5.44984	0.0758389	3.25612	13.4553	10.1576
CEO1	9.49662	2.3121	2.86571	10.0659	0.88157	0.653142
CEO2	8.17762	22.7308	2.60587	7.99017	1.59416	33.0424
CEO3	19.7031	27.4325	5.96943	4.50011	5.22951	23.2206
PEO1	0.577292	0.481273	19.538	2.83667	0.983364	0.306777
PEO2	5.12033	0.184225	39.5866	4.00353	0.202546	0.182452
PEO3	11.2616	12.9374	0.0876916	0.499583	5.29541	1.27658
PEO4	10.6772	12.2573	0.276468	5.01783	0.0494543	4.50861
Squared cosines of the observations:
	F1	F2	F3	F4	F5	F6
GEN	0.378443	0.0905744	0.350841	0.0179865	0.158917	0.00323884
STR	0.308771	0.0919747	0.312016	0.00687007	0.278981	0.00138629
AMC	0.832811	0.03432	0.00616431	0.126015	0.00031178	0.000378094
OEO1	0.834202	0.12085	0.0297168	0.0122578	0.0023625	0.000611025
OEO2	0.722207	0.130657	0.0449715	0.096706	0.000420658	0.00503826
EEO1	0.381787	0.320771	0.182628	0.00715754	0.100418	0.00723855
EEO2	0.116345	0.662984	0.157713	0.000993553	0.0586387	0.00332527
REO1	0.0380126	0.616114	0.262992	0.0126195	0.0675302	0.00273166
REO2	0.0102532	0.816479	0.00360762	0.0449964	0.113	0.0116637
CEO1	0.802403	0.10865	0.0427586	0.0436308	0.00232225	0.000235244
CEO2	0.373745	0.577782	0.0210314	0.0187336	0.00227148	0.00643736
CEO3	0.539707	0.417917	0.0288752	0.0063236	0.00446595	0.00271134
PEO1	0.129071	0.0598446	0.771402	0.0325356	0.00685449	0.000292377
PEO2	0.412069	0.00824561	0.562586	0.0165285	0.000508189	6.25906e-05
PEO3	0.60324	0.385422	0.000829499	0.00137282	0.00884338	0.000291491
PEO4	0.599128	0.382523	0.00273952	0.0144442	8.65154e-05	0.00107843
Values in bold correspond for each observation to the factor for which the squared cosine is the largest

## Sheet: AHC
	XLSTAT-Student 2023.1.4.1408 - Agglomerative hierarchical clustering (AHC) - Start time: 20/05/2023 at 00:15:55 / End time: 20/05/2023 at 00:15:58 / Microsoft Excel 16.016327
	Observations/variables table: Workbook = Data Analysis, PCA 19.05.2023.xlsx / Sheet = PCA S. aureus / Range = 'PCA S. aureus'!$B$160:$G$176 / 16 rows and 6 columns
	Row labels: Workbook = Data Analysis, PCA 19.05.2023.xlsx / Sheet = PCA S. aureus / Range = 'PCA S. aureus'!$A$160:$A$176 / 16 rows and 1 column
	Cluster rows
	Dissimilarity: Euclidean distance
	Agglomeration method: Ward's method
	Center: No / Reduce: No
	Truncation: Hartigan index (adapted)
	Summary statistics:
	Variable	Observations	Obs. with missing data	Obs. without missing data	Minimum	Maximum	Mean	Std. deviation
	F1	16	0	16	-3.22424	2.60454	3.33067e-15	1.87549
	F2	16	0	16	-1.94843	2.83722	2.22045e-16	1.39867
	F3	16	0	16	-0.790581	1.92052	2.87964e-16	0.788132
	F4	16	0	16	-1.01314	0.690267	-1.9186e-15	0.424789
	F5	16	0	16	-0.470458	0.735746	-3.07263e-16	0.331153
	F6	16	0	16	-0.272609	0.228529	-4.98733e-16	0.12245
	Node statistics:
	Node	Level	Weight	Objects	Left son	Right son
	31	42.4046	16	16	29	30
	30	21.5627	6	6	25	28
	29	15.4501	10	10	26	27
	28	8.54771	4	4	20	24
	27	2.31124	4	4	3	22
	26	2.22085	6	6	17	23
	25	1.28281	2	2	11	12
	24	0.947957	2	2	13	14
	23	0.45402	4	4	9	21
	22	0.23413	3	3	5	19
	21	0.226486	3	3	6	18
	20	0.130967	2	2	15	16
	19	0.0926234	2	2	4	10
	18	0.0680314	2	2	7	8
	17	0.065785	2	2	1	2
	Evolution of indices:
	Number of clusters	2	3	4	5
	Silhouette index	0.400046	0.459116	0.513557	0.609403
	Hartigan index (H)	8.75091	11.1805	11.702	4.03804
	H(k-1) - H(k)	2.32586	-2.42956	-0.521577	7.664
	Calinski & Harabasz index	11.0768	12.9801	19.1568	30.1066
	Agglomerative hierarchical clustering (AHC) / Number of clusters = 5:
	Inertia decomposition for the optimal classification:
		Absolute	Percent
	Within-cluster	8.0349	0.0836969
	Between-clusters	87.9651	0.916303
	Total inertia	96	1
	Cluster centroids:
	Cluster	F1	F2	F3	F4	F5	F6	Sum of weights	Within-cluster variance
	1	0.517559	-0.802399	-0.555254	-0.0435697	-0.035506	0.00691059	6	0.607034
	2	2.30068	0.774042	0.307548	0.12473	-0.0267812	0.000802103	4	0.879331
	3	-2.65071	2.70995	-0.619262	-0.0580216	-0.0656802	-0.0220402	2	1.28281
	4	-1.09777	0.0716466	1.63487	-0.303138	0.0924526	0.0232623	2	0.947957
	5	-2.40555	-1.92248	0.0350532	0.242409	0.133308	-0.023558	2	0.130967
	Distances between the cluster centroids:
		1	2	3	4	5
	1	0	2.53723	4.73081	2.87296	3.20293
	2	2.53723	0	5.39985	3.74198	5.43453
	3	4.73081	5.39985	0	3.8132	4.69866
	4	2.87296	3.74198	3.8132	0	2.92365
	5	3.20293	5.43453	4.69866	2.92365	0
	Central objects:
	Cluster	F1	F2	F3	F4	F5	F6
	1 (EEO2)	0.41657	-0.994411	-0.485007	0.0384955	-0.295737	-0.0704252
	2 (OEO1)	2.47339	0.941414	0.466829	0.299822	-0.131626	0.0669401
	3 (CEO2)	-2.07718	2.58267	-0.492743	-0.465047	0.161935	-0.272609
	4 (PEO1)	-0.551897	0.3758	1.34923	-0.277092	0.127184	0.0262673
	5 (PEO3)	-2.43759	-1.94843	-0.0903907	0.116285	0.295138	0.0535832
	Distances between the central objects:
		1 (EEO2)	2 (OEO1)	3 (CEO2)	4 (PEO1)	5 (PEO3)
	1 (EEO2)	0	2.99967	4.41794	2.54315	3.09559
	2 (OEO1)	2.99967	0	5.01086	3.2638	5.74416
	3 (CEO2)	4.41794	5.01086	0	3.27345	4.61353
	4 (PEO1)	2.54315	3.2638	3.27345	0	3.34874
	5 (PEO3)	3.09559	5.74416	4.61353	3.34874	0
	Results by cluster:
	Cluster	1	2	3	4	5
	Number of objects by cluster	6	4	2	2	2
	Sum of weights	6	4	2	2	2
	Within-cluster variance	0.607034	0.879331	1.28281	0.947957	0.130967
	Minimum distance to centroid	0.36392	0.359496	0.800879	0.688461	0.255897
	Average distance to centroid	0.673328	0.723623	0.800879	0.688461	0.255897
	Maximum distance to centroid	0.928339	1.3166	0.800879	0.688461	0.255897
		GEN	AMC	CEO2	PEO1	PEO3
		STR	OEO1	CEO3	PEO2	PEO4
		EEO1	OEO2
		EEO2	CEO1
		REO1
		REO2
	Results by object:
	Observation	Cluster	Distance to centroid
	GEN	1	0.827368
	STR	1	0.928339
	AMC	2	1.3166
	OEO1	2	0.359496
	OEO2	2	0.737804
	EEO1	1	0.437623
	EEO2	1	0.36392
	REO1	1	0.560186
	REO2	1	0.92253
	CEO1	2	0.480594
	CEO2	3	0.800879
	CEO3	3	0.800879
	PEO1	4	0.688461
	PEO2	4	0.688461
	PEO3	5	0.255897
	PEO4	5	0.255897

## Sheet: XLSTAT_20230520_001542_1_HID
9.14062	42.4046	1	0	2.625	42.4046	1	5
5.28125	42.4046	2	0	1.5	42.4046	2	5
5.28125	15.4501	3	0	1.5	15.4501	3	5
2.6875	15.4501	4	0	1	15.4501	4	5
2.6875	2.22085	5	0	1	0	5	5
1.5	2.22085	6	0	1	15.4501
1.5	0.065785	7	0	2	15.4501
1	0.065785	8	0	2	0
1	0	9	0	2	15.4501
1	0.065785	10	0	1.5	15.4501
2	0.065785	11	0	1.5	42.4046
2	0	12	0	3.75	42.4046
2	0.065785	13	0	3.75	21.5627
1.5	0.065785	14	0	3	21.5627
1.5	2.22085	15	0	3	0
3.875	2.22085	16	0	3	21.5627
3.875	0.45402			4.5	21.5627
3	0.45402			4.5	8.54771
3	0			4	8.54771
3	0.45402			4	0
4.75	0.45402			4	8.54771
4.75	0.226486			5	8.54771
4	0.226486			5	0
4	0			5	8.54771
4	0.226486			4.5	8.54771
5.5	0.226486			4.5	21.5627
5.5	0.0680314			3.75	21.5627
5	0.0680314			3.75	42.4046
5	0			2.625	42.4046
5	0.0680314			0	0
6	0.0680314			0	0
6	0			0	0
6	0.0680314			0	0
5.5	0.0680314			0	0
5.5	0.226486			0	0
4.75	0.226486			0	0
4.75	0.45402			0	0
3.875	0.45402			0	0
3.875	2.22085			0	0
2.6875	2.22085			0	0
2.6875	15.4501			0	0
7.875	15.4501			0	0
7.875	2.31124			0	0
7	2.31124			0	0
7	0			0	0
7	2.31124			0	0
8.75	2.31124			0	0
8.75	0.23413			0	0
8	0.23413			0	0
8	0			0	0
8	0.23413			0	0
9.5	0.23413			0	0
9.5	0.0926234			0	0
9	0.0926234			0	0
9	0			0	0
9	0.0926234			0	0
10	0.0926234			0	0
10	0			0	0
10	0.0926234			0	0
9.5	0.0926234			0	0
9.5	0.23413			0	0
8.75	0.23413			0	0
8.75	2.31124			0	0
7.875	2.31124			0	0
7.875	15.4501			0	0
5.28125	15.4501			0	0
5.28125	42.4046			0	0
13	42.4046			0	0
13	21.5627			0	0
11.5	21.5627			0	0
11.5	1.28281			0	0
11	1.28281			0	0
11	0			0	0
11	1.28281			0	0
12	1.28281			0	0
12	0			0	0
12	1.28281			0	0
11.5	1.28281			0	0
11.5	21.5627			0	0
14.5	21.5627			0	0
14.5	8.54771			0	0
13.5	8.54771			0	0
13.5	0.130967			0	0
13	0.130967			0	0
13	0			0	0
13	0.130967			0	0
14	0.130967			0	0
14	0			0	0
14	0.130967			0	0
13.5	0.130967			0	0
13.5	8.54771			0	0
15.5	8.54771			0	0
15.5	0.947957			0	0
15	0.947957			0	0
15	0			0	0
15	0.947957			0	0
16	0.947957			0	0
16	0			0	0
16	0.947957			0	0
15.5	0.947957			0	0
15.5	8.54771			0	0
14.5	8.54771			0	0
14.5	21.5627			0	0
13	21.5627			0	0
13	42.4046			0	0
9.14062	42.4046			0	0
0	0			0	0
0	0			0	0
0	0			0	0
0	0			0	0
0	0			0	0
0	0			0	0
0	0			0	0
0	0			0	0
0	0			0	0
0	0			0	0
0	0			0	0
0	0			0	0
0	0			0	0
0	0			0	0
0	0			0	0
0	0			0	0
0	0			0	0
0	0			0	0
0	0			0	0
0	0			0	0
0	0			0	0
0	0			0	0

## Sheet: Sheet14_HID1
	72.9	0	72	0	91.4	0	91	0	93.56	0	93	0	67.72	0	67	0	59.56	0	59	0	87.18	0	87	0	87.9	0	87	0	91.72	0	91	0	92	0	92	0	91.4	0	91	0	86.64	0	86	0	86.1	0	86	0	86.1
	72.9	1	72	0	91.4	1	91	0	93.56	1	93	0	67.72	1	67	0	59.56	1	59	0	87.18	1	87	0	87.9	1	87	0	91.72	1	91	0	92	1	92	1	91.4	1	91	0	86.64	1	86	0	86.1	1	86	0	86.1
	72.9005	1	72.1	0	91.4002	1	91.05	0	93.5603	1	93.07	0	67.7204	1	67.09	0	59.5603	1	59.07	0	87.1801	1	87.03	0	87.9005	1	87.1	0	91.7204	1	91.09	0	92	1	92.01	1	91.4002	1	91.05	0	86.6404	1	86.08	0	86.1001	1	86.02	0	86.1001
	72.9005	0	72.1	0	91.4002	0	91.05	0	93.5603	0	93.07	0	67.7204	0	67.09	0	59.5603	0	59.07	0	87.1801	0	87.03	0	87.9005	0	87.1	0	91.7204	0	91.09	0	92	0	92.01	0	91.4002	0	91.05	0	86.6404	0	86.08	0	86.1001	0	86.02	0	86.1001
	72.901	0	72.1	0	91.4005	0	91.05	0	93.5607	0	93.07	0	67.7209	0	67.09	0	59.5607	0	59.07	0	87.1803	0	87.03	0	87.901	0	87.1	0	91.7209	0	91.09	0	92.0001	0	92.01	0	91.4005	0	91.05	0	86.6408	0	86.08	0	86.1002	0	86.02	0	86.1002
	72.901	1	72.2	0	91.4005	1	91.1	0	93.5607	1	93.14	0	67.7209	1	67.18	0	59.5607	1	59.14	0	87.1803	1	87.06	0	87.901	1	87.2	0	91.7209	1	91.18	0	92.0001	1	92.02	0	91.4005	1	91.1	0	86.6408	1	86.16	0	86.1002	1	86.04	0	86.1002
	72.9015	1	72.2	0	91.4008	1	91.1	0	93.5611	1	93.14	0	67.7214	1	67.18	0	59.561	1	59.14	0	87.1804	1	87.06	0	87.9015	1	87.2	0	91.7213	1	91.18	0	92.0001	1	92.02	0	91.4008	1	91.1	0	86.6412	1	86.16	0	86.1003	1	86.04	0	86.1003
	72.9015	0	72.2	0	91.4008	0	91.1	0	93.5611	0	93.14	0	67.7214	0	67.18	0	59.561	0	59.14	0	87.1804	0	87.06	0	87.9015	0	87.2	0	91.7213	0	91.18	0	92.0001	0	92.02	0	91.4008	0	91.1	0	86.6412	0	86.16	0	86.1003	0	86.04	0	86.1003
	72.902	0	72.3	0	91.401	0	91.15	0	93.5614	0	93.21	0	67.7218	0	67.27	0	59.5614	0	59.21	0	87.1806	0	87.09	0	87.902	0	87.3	0	91.7218	0	91.27	0	92.0002	0	92.03	0	91.401	0	91.15	0	86.6416	0	86.24	0	86.1004	0	86.06	0	86.1004
	72.902	1	72.3	0	91.401	1	91.15	0	93.5614	1	93.21	0	67.7218	1	67.27	0	59.5614	1	59.21	0	87.1806	1	87.09	0	87.902	1	87.3	0	91.7218	1	91.27	0	92.0002	1	92.03	0	91.401	1	91.15	0	86.6416	1	86.24	0	86.1004	1	86.06	0	86.1004
	72.9025	1	72.3	0	91.4013	1	91.15	0	93.5618	1	93.21	0	67.7223	1	67.27	0	59.5617	1	59.21	0	87.1807	1	87.09	0	87.9025	1	87.3	0	91.7222	1	91.27	0	92.0002	1	92.03	0	91.4013	1	91.15	0	86.642	1	86.24	0	86.1005	1	86.06	0	86.1005
	72.9025	0	72.4	0	91.4013	0	91.2	0	93.5618	0	93.28	0	67.7223	0	67.36	0	59.5617	0	59.28	0	87.1807	0	87.12	0	87.9025	0	87.4	0	91.7222	0	91.36	0	92.0002	0	92.04	0	91.4013	0	91.2	0	86.642	0	86.32	0	86.1005	0	86.08	0	86.1005
	72.903	0	72.4	0	91.4015	0	91.2	0	93.5621	0	93.28	0	67.7227	0	67.36	0	59.5621	0	59.28	0	87.1809	0	87.12	0	87.903	0	87.4	0	91.7227	0	91.36	0	92.0003	0	92.04	0	91.4015	0	91.2	0	86.6424	0	86.32	0	86.1006	0	86.08	0	86.1006
	72.903	1	72.4	0	91.4015	1	91.2	0	93.5621	1	93.28	0	67.7227	1	67.36	0	59.5621	1	59.28	0	87.1809	1	87.12	0	87.903	1	87.4	0	91.7227	1	91.36	0	92.0003	1	92.04	0	91.4015	1	91.2	0	86.6424	1	86.32	0	86.1006	1	86.08	0	86.1006
	72.9035	1	72.5	0	91.4018	1	91.25	0	93.5624	1	93.35	0	67.7232	1	67.45	0	59.5624	1	59.35	0	87.181	1	87.15	0	87.9035	1	87.5	0	91.7231	1	91.45	0	92.0003	1	92.05	0	91.4018	1	91.25	0	86.6428	1	86.4	0	86.1007	1	86.1	0	86.1007
	72.9035	0	72.5	0	91.4018	0	91.25	0	93.5624	0	93.35	0	67.7232	0	67.45	0	59.5624	0	59.35	0	87.181	0	87.15	0	87.9035	0	87.5	0	91.7231	0	91.45	0	92.0003	0	92.05	0	91.4018	0	91.25	0	86.6428	0	86.4	0	86.1007	0	86.1	0	86.1007
	72.904	0	72.5	0	91.402	0	91.25	0	93.5628	0	93.35	0	67.7236	0	67.45	0	59.5628	0	59.35	0	87.1812	0	87.15	0	87.904	0	87.5	0	91.7236	0	91.45	0	92.0004	0	92.05	0	91.402	0	91.25	0	86.6432	0	86.4	0	86.1008	0	86.1	1	86.1008
	72.904	1	72.6	0	91.402	1	91.3	0	93.5628	1	93.42	0	67.7236	1	67.54	0	59.5628	1	59.42	0	87.1812	1	87.18	0	87.904	1	87.6	0	91.7236	1	91.54	0	92.0004	1	92.06	0	91.402	1	91.3	0	86.6432	1	86.48	0	86.1008	1	86.12	1	86.1008
	72.9045	1	72.6	0	91.4023	1	91.3	0	93.5632	1	93.42	0	67.7241	1	67.54	0	59.5631	1	59.42	0	87.1813	1	87.18	0	87.9045	1	87.6	0	91.724	1	91.54	0	92.0004	1	92.06	0	91.4023	1	91.3	0	86.6436	1	86.48	0	86.1009	1	86.12	0	86.1009
	72.9045	0	72.6	0	91.4023	0	91.3	0	93.5632	0	93.42	0	67.7241	0	67.54	0	59.5631	0	59.42	0	87.1813	0	87.18	1	87.9045	0	87.6	0	91.724	0	91.54	0	92.0004	0	92.06	0	91.4023	0	91.3	0	86.6436	0	86.48	0	86.1009	0	86.12	0	86.1009
	72.905	0	72.7	0	91.4025	0	91.35	0	93.5635	0	93.49	0	67.7245	0	67.63	0	59.5635	0	59.49	0	87.1815	0	87.21	1	87.905	0	87.7	0	91.7245	0	91.63	0	92.0005	0	92.07	0	91.4025	0	91.35	0	86.644	0	86.56	0	86.101	0	86.14	0	86.101
	72.905	1	72.7	0	91.4025	1	91.35	0	93.5635	1	93.49	0	67.7245	1	67.63	0	59.5635	1	59.49	0	87.1815	1	87.21	0	87.905	1	87.7	0	91.7245	1	91.63	0	92.0005	1	92.07	0	91.4025	1	91.35	0	86.644	1	86.56	0	86.101	1	86.14	0	86.101
	72.9055	1	72.7	0	91.4028	1	91.35	0	93.5639	1	93.49	0	67.7249	1	67.63	0	59.5638	1	59.49	0	87.1816	1	87.21	0	87.9055	1	87.7	0	91.7249	1	91.63	0	92.0005	1	92.07	0	91.4028	1	91.35	0	86.6444	1	86.56	0	86.1011	1	86.14	0	86.1011
	72.9055	0	72.8	0	91.4028	0	91.4	0	93.5639	0	93.56	0	67.7249	0	67.72	0	59.5638	0	59.56	0	87.1816	0	87.24	0	87.9055	0	87.8	0	91.7249	0	91.72	0	92.0005	0	92.08	0	91.4028	0	91.4	0	86.6444	0	86.64	0	86.1011	0	86.16	0	86.1011
	72.906	0	72.8	0	91.403	0	91.4	0	93.5642	0	93.56	0	67.7254	0	67.72	0	59.5642	0	59.56	0	87.1818	0	87.24	0	87.906	0	87.8	0	91.7253	0	91.72	0	92.0006	0	92.08	0	91.403	0	91.4	0	86.6448	0	86.64	0	86.1012	0	86.16	0	86.1012
	72.906	1	72.8	0	91.403	1	91.4	1	93.5642	1	93.56	1	67.7254	1	67.72	1	59.5642	1	59.56	1	87.1818	1	87.24	0	87.906	1	87.8	0	91.7253	1	91.72	1	92.0006	1	92.08	0	91.403	1	91.4	1	86.6448	1	86.64	1	86.1012	1	86.16	0	86.1012
	72.9065	1	72.9	0	91.4032	1	91.45	1	93.5645	1	93.63	1	67.7258	1	67.81	1	59.5645	1	59.63	1	87.1819	1	87.27	0	87.9065	1	87.9	0	91.7258	1	91.81	1	92.0006	1	92.09	0	91.4032	1	91.45	1	86.6452	1	86.72	1	86.1013	1	86.18	0	86.1013
	72.9065	0	72.9	0	91.4032	0	91.45	0	93.5645	0	93.63	0	67.7258	0	67.81	0	59.5645	0	59.63	0	87.1819	0	87.27	0	87.9065	0	87.9	0	91.7258	0	91.81	0	92.0006	0	92.09	0	91.4032	0	91.45	0	86.6452	0	86.72	0	86.1013	0	86.18	0	86.1013
	72.907	0	72.9	1	91.4035	0	91.45	0	93.5649	0	93.63	0	67.7263	0	67.81	0	59.5649	0	59.63	0	87.1821	0	87.27	0	87.907	0	87.9	1	91.7262	0	91.81	0	92.0007	0	92.09	0	91.4035	0	91.45	0	86.6456	0	86.72	0	86.1014	0	86.18	0	86.1014
	72.907	1	73	1	91.4035	1	91.5	0	93.5649	1	93.7	0	67.7263	1	67.9	0	59.5649	1	59.7	0	87.1821	1	87.3	0	87.907	1	88	1	91.7262	1	91.9	0	92.0007	1	92.1	0	91.4035	1	91.5	0	86.6456	1	86.8	0	86.1014	1	86.2	0	86.1014
	72.9075	1	73	0	91.4038	1	91.5	0	93.5653	1	93.7	0	67.7267	1	67.9	0	59.5652	1	59.7	0	87.1822	1	87.3	0	87.9075	1	88	0	91.7267	1	91.9	0	92.0007	1	92.1	0	91.4038	1	91.5	0	86.646	1	86.8	0	86.1015	1	86.2	0	86.1015
	72.9075	0			91.4038	0			93.5653	0			67.7267	0			59.5652	0			87.1822	0			87.9075	0			91.7267	0			92.0007	0			91.4038	0			86.646	0			86.1015	0			86.1015
	72.908	0			91.404	0			93.5656	0			67.7272	0			59.5655	0			87.1824	0			87.908	0			91.7271	0			92.0008	0			91.404	0			86.6464	0			86.1016	0			86.1016
	72.908	1			91.404	1			93.5656	1			67.7272	1			59.5655	1			87.1824	1			87.908	1			91.7271	1			92.0008	1			91.404	1			86.6464	1			86.1016	1			86.1016
	72.9085	1			91.4043	1			93.566	1			67.7276	1			59.5659	1			87.1825	1			87.9085	1			91.7276	1			92.0008	1			91.4043	1			86.6468	1			86.1017	1			86.1017
	72.9085	0			91.4043	0			93.566	0			67.7276	0			59.5659	0			87.1825	0			87.9085	0			91.7276	0			92.0008	0			91.4043	0			86.6468	0			86.1017	0			86.1017
	72.909	0			91.4045	0			93.5663	0			67.7281	0			59.5662	0			87.1827	0			87.909	0			91.728	0			92.0009	0			91.4045	0			86.6472	0			86.1018	0			86.1018
	72.909	1			91.4045	1			93.5663	1			67.7281	1			59.5662	1			87.1827	1			87.909	1			91.728	1			92.0009	1			91.4045	1			86.6472	1			86.1018	1			86.1018
	72.9095	1			91.4048	1			93.5666	1			67.7285	1			59.5666	1			87.1828	1			87.9095	1			91.7285	1			92.0009	1			91.4048	1			86.6476	1			86.1019	1			86.1019
	72.9095	0			91.4048	0			93.5666	0			67.7285	0			59.5666	0			87.1828	0			87.9095	0			91.7285	0			92.0009	0			91.4048	0			86.6476	0			86.1019	0			86.1019
	72.91	0			91.405	0			93.567	0			67.729	0			59.5669	0			87.183	0			87.91	0			91.7289	0			92.001	0			91.405	0			86.648	0			86.102	0			86.102
	72.91	1			91.405	1			93.567	1			67.729	1			59.5669	1			87.183	1			87.91	1			91.7289	1			92.001	1			91.405	1			86.648	1			86.102	1			86.102
	72.9105	1			91.4053	1			93.5674	1			67.7294	1			59.5673	1			87.1831	1			87.9105	1			91.7294	1			92.001	1			91.4053	1			86.6484	1			86.1021	1			86.1021
	72.9105	0			91.4053	0			93.5674	0			67.7294	0			59.5673	0			87.1831	0			87.9105	0			91.7294	0			92.001	0			91.4053	0			86.6484	0			86.1021	0			86.1021
	72.911	0			91.4055	0			93.5677	0			67.7299	0			59.5676	0			87.1833	0			87.911	0			91.7298	0			92.0011	0			91.4055	0			86.6488	0			86.1022	0			86.1022
	72.911	1			91.4055	1			93.5677	1			67.7299	1			59.5676	1			87.1833	1			87.911	1			91.7298	1			92.0011	1			91.4055	1			86.6488	1			86.1022	1			86.1022
	72.9115	1			91.4058	1			93.568	1			67.7304	1			59.568	1			87.1834	1			87.9115	1			91.7302	1			92.0011	1			91.4058	1			86.6492	1			86.1023	1			86.1023
	72.9115	0			91.4058	0			93.568	0			67.7304	0			59.568	0			87.1834	0			87.9115	0			91.7302	0			92.0011	0			91.4058	0			86.6492	0			86.1023	0			86.1023
	72.912	0			91.406	0			93.5684	0			67.7308	0			59.5683	0			87.1836	0			87.912	0			91.7307	0			92.0012	0			91.406	0			86.6496	0			86.1024	0			86.1024
	72.912	1			91.406	1			93.5684	1			67.7308	1			59.5683	1			87.1836	1			87.912	1			91.7307	1			92.0012	1			91.406	1			86.6496	1			86.1024	1			86.1024
	72.9125	1			91.4062	1			93.5687	1			67.7313	1			59.5687	1			87.1837	1			87.9125	1			91.7311	1			92.0012	1			91.4062	1			86.65	1			86.1025	1			86.1025
	72.9125	0			91.4062	0			93.5687	0			67.7313	0			59.5687	0			87.1837	0			87.9125	0			91.7311	0			92.0012	0			91.4062	0			86.65	0			86.1025	0			86.1025
	72.913	0			91.4065	0			93.5691	0			67.7317	0			59.569	0			87.1839	0			87.913	0			91.7316	0			92.0013	0			91.4065	0			86.6504	0			86.1026	0			86.1026
	72.913	1			91.4065	1			93.5691	1			67.7317	1			59.569	1			87.1839	1			87.913	1			91.7316	1			92.0013	1			91.4065	1			86.6504	1			86.1026	1			86.1026
	72.9135	1			91.4068	1			93.5695	1			67.7322	1			59.5694	1			87.184	1			87.9135	1			91.732	1			92.0013	1			91.4068	1			86.6508	1			86.1027	1			86.1027
	72.9135	0			91.4068	0			93.5695	0			67.7322	0			59.5694	0			87.184	0			87.9135	0			91.732	0			92.0013	0			91.4068	0			86.6508	0			86.1027	0			86.1027
	72.914	0			91.407	0			93.5698	0			67.7326	0			59.5697	0			87.1842	0			87.914	0			91.7325	0			92.0014	0			91.407	0			86.6512	0			86.1028	0			86.1028
	72.914	1			91.407	1			93.5698	1			67.7326	1			59.5697	1			87.1842	1			87.914	1			91.7325	1			92.0014	1			91.407	1			86.6512	1			86.1028	1			86.1028
	72.9145	1			91.4073	1			93.5701	1			67.733	1			59.57	1			87.1843	1			87.9145	1			91.7329	1			92.0014	1			91.4073	1			86.6516	1			86.1029	1			86.1029
	72.9145	0			91.4073	0			93.5701	0			67.733	0			59.57	0			87.1843	0			87.9145	0			91.7329	0			92.0014	0			91.4073	0			86.6516	0			86.1029	0			86.1029
	72.915	0			91.4075	0			93.5705	0			67.7335	0			59.5704	0			87.1845	0			87.915	0			91.7334	0			92.0015	0			91.4075	0			86.652	0			86.103	0			86.103
	72.915	1			91.4075	1			93.5705	1			67.7335	1			59.5704	1			87.1845	1			87.915	1			91.7334	1			92.0015	1			91.4075	1			86.652	1			86.103	1			86.103
	72.9155	1			91.4078	1			93.5709	1			67.7339	1			59.5707	1			87.1846	1			87.9155	1			91.7338	1			92.0015	1			91.4078	1			86.6524	1			86.1031	1			86.1031
	72.9155	0			91.4078	0			93.5709	0			67.7339	0			59.5707	0			87.1846	0			87.9155	0			91.7338	0			92.0015	0			91.4078	0			86.6524	0			86.1031	0			86.1031
	72.916	0			91.408	0			93.5712	0			67.7344	0			59.5711	0			87.1848	0			87.916	0			91.7343	0			92.0016	0			91.408	0			86.6528	0			86.1032	0			86.1032
	72.916	1			91.408	1			93.5712	1			67.7344	1			59.5711	1			87.1848	1			87.916	1			91.7343	1			92.0016	1			91.408	1			86.6528	1			86.1032	1			86.1032
	72.9165	1			91.4083	1			93.5716	1			67.7348	1			59.5714	1			87.1849	1			87.9165	1			91.7347	1			92.0016	1			91.4083	1			86.6532	1			86.1033	1			86.1033
	72.9165	0			91.4083	0			93.5716	0			67.7348	0			59.5714	0			87.1849	0			87.9165	0			91.7347	0			92.0016	0			91.4083	0			86.6532	0			86.1033	0			86.1033
	72.917	0			91.4085	0			93.5719	0			67.7353	0			59.5718	0			87.185	0			87.917	0			91.7351	0			92.0017	0			91.4085	0			86.6536	0			86.1034	0			86.1034
	72.917	1			91.4085	1			93.5719	1			67.7353	1			59.5718	1			87.185	1			87.917	1			91.7351	1			92.0017	1			91.4085	1			86.6536	1			86.1034	1			86.1034
	72.9175	1			91.4088	1			93.5722	1			67.7357	1			59.5721	1			87.1852	1			87.9175	1			91.7356	1			92.0017	1			91.4088	1			86.654	1			86.1035	1			86.1035
	72.9175	0			91.4088	0			93.5722	0			67.7357	0			59.5721	0			87.1852	0			87.9175	0			91.7356	0			92.0017	0			91.4088	0			86.654	0			86.1035	0			86.1035
	72.918	0			91.409	0			93.5726	0			67.7362	0			59.5725	0			87.1853	0			87.918	0			91.736	0			92.0018	0			91.409	0			86.6544	0			86.1036	0			86.1036
	72.918	1			91.409	1			93.5726	1			67.7362	1			59.5725	1			87.1853	1			87.918	1			91.736	1			92.0018	1			91.409	1			86.6544	1			86.1036	1			86.1036
	72.9185	1			91.4093	1			93.573	1			67.7366	1			59.5728	1			87.1855	1			87.9185	1			91.7365	1			92.0018	1			91.4093	1			86.6548	1			86.1037	1			86.1037
	72.9185	0			91.4093	0			93.573	0			67.7366	0			59.5728	0			87.1855	0			87.9185	0			91.7365	0			92.0018	0			91.4093	0			86.6548	0			86.1037	0			86.1037
	72.919	0			91.4095	0			93.5733	0			67.7371	0			59.5732	0			87.1856	0			87.919	0			91.7369	0			92.0019	0			91.4095	0			86.6552	0			86.1038	0			86.1038
	72.919	1			91.4095	1			93.5733	1			67.7371	1			59.5732	1			87.1856	1			87.919	1			91.7369	1			92.0019	1			91.4095	1			86.6552	1			86.1038	1			86.1038
	72.9195	1			91.4098	1			93.5737	1			67.7375	1			59.5735	1			87.1858	1			87.9195	1			91.7374	1			92.0019	1			91.4098	1			86.6556	1			86.1039	1			86.1039
	72.9195	0			91.4098	0			93.5737	0			67.7375	0			59.5735	0			87.1858	0			87.9195	0			91.7374	0			92.0019	0			91.4098	0			86.6556	0			86.1039	0			86.1039
	72.92	0			91.41	0			93.574	0			67.738	0			59.5739	0			87.1859	0			87.92	0			91.7378	0			92.002	0			91.41	0			86.656	0			86.104	0			86.104
	72.92	1			91.41	1			93.574	1			67.738	1			59.5739	1			87.1859	1			87.92	1			91.7378	1			92.002	1			91.41	1			86.656	1			86.104	1			86.104
	72.9205	1			91.4103	1			93.5743	1			67.7385	1			59.5742	1			87.1861	1			87.9205	1			91.7383	1			92.002	1			91.4103	1			86.6564	1			86.1041	1			86.1041
	72.9205	0			91.4103	0			93.5743	0			67.7385	0			59.5742	0			87.1861	0			87.9205	0			91.7383	0			92.002	0			91.4103	0			86.6564	0			86.1041	0			86.1041
	72.921	0			91.4105	0			93.5747	0			67.7389	0			59.5746	0			87.1862	0			87.921	0			91.7387	0			92.0021	0			91.4105	0			86.6568	0			86.1042	0			86.1042
	72.921	1			91.4105	1			93.5747	1			67.7389	1			59.5746	1			87.1862	1			87.921	1			91.7387	1			92.0021	1			91.4105	1			86.6568	1			86.1042	1			86.1042
	72.9215	1			91.4108	1			93.5751	1			67.7394	1			59.5749	1			87.1864	1			87.9215	1			91.7392	1			92.0021	1			91.4108	1			86.6572	1			86.1043	1			86.1043
	72.9215	0			91.4108	0			93.5751	0			67.7394	0			59.5749	0			87.1864	0			87.9215	0			91.7392	0			92.0021	0			91.4108	0			86.6572	0			86.1043	0			86.1043
	72.922	0			91.411	0			93.5754	0			67.7398	0			59.5752	0			87.1865	0			87.922	0			91.7396	0			92.0022	0			91.411	0			86.6576	0			86.1044	0			86.1044
	72.922	1			91.411	1			93.5754	1			67.7398	1			59.5752	1			87.1865	1			87.922	1			91.7396	1			92.0022	1			91.411	1			86.6576	1			86.1044	1			86.1044
	72.9225	1			91.4113	1			93.5757	1			67.7403	1			59.5756	1			87.1867	1			87.9225	1			91.74	1			92.0022	1			91.4113	1			86.658	1			86.1045	1			86.1045
	72.9225	0			91.4113	0			93.5757	0			67.7403	0			59.5756	0			87.1867	0			87.9225	0			91.74	0			92.0022	0			91.4113	0			86.658	0			86.1045	0			86.1045
	72.923	0			91.4115	0			93.5761	0			67.7407	0			59.5759	0			87.1868	0			87.923	0			91.7405	0			92.0023	0			91.4115	0			86.6584	0			86.1046	0			86.1046
	72.923	1			91.4115	1			93.5761	1			67.7407	1			59.5759	1			87.1868	1			87.923	1			91.7405	1			92.0023	1			91.4115	1			86.6584	1			86.1046	1			86.1046
	72.9235	1			91.4118	1			93.5764	1			67.7411	1			59.5763	1			87.187	1			87.9235	1			91.7409	1			92.0023	1			91.4118	1			86.6588	1			86.1047	1			86.1047
	72.9235	0			91.4118	0			93.5764	0			67.7411	0			59.5763	0			87.187	0			87.9235	0			91.7409	0			92.0023	0			91.4118	0			86.6588	0			86.1047	0			86.1047
	72.924	0			91.412	0			93.5768	0			67.7416	0			59.5766	0			87.1871	0			87.924	0			91.7414	0			92.0024	0			91.412	0			86.6592	0			86.1048	0			86.1048
	72.924	1			91.412	1			93.5768	1			67.7416	1			59.5766	1			87.1871	1			87.924	1			91.7414	1			92.0024	1			91.412	1			86.6592	1			86.1048	1			86.1048
	72.9245	1			91.4123	1			93.5772	1			67.742	1			59.577	1			87.1873	1			87.9245	1			91.7418	1			92.0024	1			91.4123	1			86.6596	1			86.1049	1			86.1049
	72.9245	0			91.4123	0			93.5772	0			67.742	0			59.577	0			87.1873	0			87.9245	0			91.7418	0			92.0024	0			91.4123	0			86.6596	0			86.1049	0			86.1049
	72.925	0			91.4125	0			93.5775	0			67.7425	0			59.5773	0			87.1874	0			87.925	0			91.7423	0			92.0025	0			91.4125	0			86.66	0			86.105	0			86.105
	72.925	1			91.4125	1			93.5775	1			67.7425	1			59.5773	1			87.1874	1			87.925	1			91.7423	1			92.0025	1			91.4125	1			86.66	1			86.105	1			86.105
	72.9255	1			91.4128	1			93.5778	1			67.7429	1			59.5777	1			87.1876	1			87.9255	1			91.7427	1			92.0025	1			91.4128	1			86.6604	1			86.105	1			86.105
	72.9255	0			91.4128	0			93.5778	0			67.7429	0			59.5777	0			87.1876	0			87.9255	0			91.7427	0			92.0025	0			91.4128	0			86.6604	0			86.105	0			86.105
	72.926	0			91.413	0			93.5782	0			67.7434	0			59.578	0			87.1877	0			87.926	0			91.7432	0			92.0026	0			91.413	0			86.6608	0			86.1051	0			86.1051
	72.926	1			91.413	1			93.5782	1			67.7434	1			59.578	1			87.1877	1			87.926	1			91.7432	1			92.0026	1			91.413	1			86.6608	1			86.1051	1			86.1051
	72.9265	1			91.4133	1			93.5786	1			67.7438	1			59.5784	1			87.1879	1			87.9265	1			91.7436	1			92.0026	1			91.4133	1			86.6612	1			86.1052	1			86.1052
	72.9265	0			91.4133	0			93.5786	0			67.7438	0			59.5784	0			87.1879	0			87.9265	0			91.7436	0			92.0026	0			91.4133	0			86.6612	0			86.1052	0			86.1052
	72.927	0			91.4135	0			93.5789	0			67.7443	0			59.5787	0			87.188	0			87.927	0			91.7441	0			92.0027	0			91.4135	0			86.6616	0			86.1053	0			86.1053
	72.927	1			91.4135	1			93.5789	1			67.7443	1			59.5787	1			87.188	1			87.927	1			91.7441	1			92.0027	1			91.4135	1			86.6616	1			86.1053	1			86.1053
	72.9275	1			91.4138	1			93.5793	1			67.7447	1			59.5791	1			87.1882	1			87.9275	1			91.7445	1			92.0027	1			91.4138	1			86.662	1			86.1054	1			86.1054
	72.9275	0			91.4138	0			93.5793	0			67.7447	0			59.5791	0			87.1882	0			87.9275	0			91.7445	0			92.0027	0			91.4138	0			86.662	0			86.1054	0			86.1054
	72.928	0			91.414	0			93.5796	0			67.7452	0			59.5794	0			87.1883	0			87.928	0			91.745	0			92.0028	0			91.414	0			86.6624	0			86.1055	0			86.1055
	72.928	1			91.414	1			93.5796	1			67.7452	1			59.5794	1			87.1883	1			87.928	1			91.745	1			92.0028	1			91.414	1			86.6624	1			86.1055	1			86.1055
	72.9285	1			91.4143	1			93.5799	1			67.7456	1			59.5798	1			87.1885	1			87.9285	1			91.7454	1			92.0028	1			91.4143	1			86.6628	1			86.1056	1			86.1056
	72.9285	0			91.4143	0			93.5799	0			67.7456	0			59.5798	0			87.1885	0			87.9285	0			91.7454	0			92.0028	0			91.4143	0			86.6628	0			86.1056	0			86.1056
	72.929	0			91.4145	0			93.5803	0			67.7461	0			59.5801	0			87.1886	0			87.929	0			91.7458	0			92.0029	0			91.4145	0			86.6632	0			86.1057	0			86.1057
	72.929	1			91.4145	1			93.5803	1			67.7461	1			59.5801	1			87.1886	1			87.929	1			91.7458	1			92.0029	1			91.4145	1			86.6632	1			86.1057	1			86.1057
	72.9295	1			91.4147	1			93.5807	1			67.7465	1			59.5804	1			87.1888	1			87.9295	1			91.7463	1			92.0029	1			91.4147	1			86.6636	1			86.1058	1			86.1058
	72.9295	0			91.4147	0			93.5807	0			67.7465	0			59.5804	0			87.1888	0			87.9295	0			91.7463	0			92.0029	0			91.4147	0			86.6636	0			86.1058	0			86.1058
	72.93	0			91.415	0			93.581	0			67.747	0			59.5808	0			87.1889	0			87.93	0			91.7467	0			92.003	0			91.415	0			86.664	0			86.1059	0			86.1059
	72.93	1			91.415	1			93.581	1			67.747	1			59.5808	1			87.1889	1			87.93	1			91.7467	1			92.003	1			91.415	1			86.664	1			86.1059	1			86.1059
	72.9305	1			91.4153	1			93.5814	1			67.7475	1			59.5811	1			87.1891	1			87.9305	1			91.7472	1			92.003	1			91.4153	1			86.6644	1			86.106	1			86.106
	72.9305	0			91.4153	0			93.5814	0			67.7475	0			59.5811	0			87.1891	0			87.9305	0			91.7472	0			92.003	0			91.4153	0			86.6644	0			86.106	0			86.106
	72.931	0			91.4155	0			93.5817	0			67.7479	0			59.5815	0			87.1892	0			87.931	0			91.7476	0			92.0031	0			91.4155	0			86.6648	0			86.1061	0			86.1061
	72.931	1			91.4155	1			93.5817	1			67.7479	1			59.5815	1			87.1892	1			87.931	1			91.7476	1			92.0031	1			91.4155	1			86.6648	1			86.1061	1			86.1061
	72.9315	1			91.4158	1			93.582	1			67.7484	1			59.5818	1			87.1894	1			87.9315	1			91.7481	1			92.0031	1			91.4158	1			86.6652	1			86.1062	1			86.1062
	72.9315	0			91.4158	0			93.582	0			67.7484	0			59.5818	0			87.1894	0			87.9315	0			91.7481	0			92.0031	0			91.4158	0			86.6652	0			86.1062	0			86.1062
	72.932	0			91.416	0			93.5824	0			67.7488	0			59.5822	0			87.1895	0			87.932	0			91.7485	0			92.0032	0			91.416	0			86.6656	0			86.1063	0			86.1063
	72.932	1			91.416	1			93.5824	1			67.7488	1			59.5822	1			87.1895	1			87.932	1			91.7485	1			92.0032	1			91.416	1			86.6656	1			86.1063	1			86.1063
	72.9325	1			91.4163	1			93.5828	1			67.7492	1			59.5825	1			87.1897	1			87.9325	1			91.749	1			92.0032	1			91.4163	1			86.666	1			86.1064	1			86.1064
	72.9325	0			91.4163	0			93.5828	0			67.7492	0			59.5825	0			87.1897	0			87.9325	0			91.749	0			92.0032	0			91.4163	0			86.666	0			86.1064	0			86.1064
	72.933	0			91.4165	0			93.5831	0			67.7497	0			59.5829	0			87.1898	0			87.933	0			91.7494	0			92.0033	0			91.4165	0			86.6664	0			86.1065	0			86.1065
	72.933	1			91.4165	1			93.5831	1			67.7497	1			59.5829	1			87.1898	1			87.933	1			91.7494	1			92.0033	1			91.4165	1			86.6664	1			86.1065	1			86.1065
	72.9335	1			91.4168	1			93.5834	1			67.7501	1			59.5832	1			87.19	1			87.9335	1			91.7499	1			92.0033	1			91.4168	1			86.6668	1			86.1066	1			86.1066
	72.9335	0			91.4168	0			93.5834	0			67.7501	0			59.5832	0			87.19	0			87.9335	0			91.7499	0			92.0033	0			91.4168	0			86.6668	0			86.1066	0			86.1066
	72.934	0			91.417	0			93.5838	0			67.7506	0			59.5836	0			87.1901	0			87.934	0			91.7503	0			92.0034	0			91.417	0			86.6672	0			86.1067	0			86.1067
	72.934	1			91.417	1			93.5838	1			67.7506	1			59.5836	1			87.1901	1			87.934	1			91.7503	1			92.0034	1			91.417	1			86.6672	1			86.1067	1			86.1067
	72.9345	1			91.4173	1			93.5841	1			67.751	1			59.5839	1			87.1902	1			87.9345	1			91.7507	1			92.0034	1			91.4173	1			86.6676	1			86.1068	1			86.1068
	72.9345	0			91.4173	0			93.5841	0			67.751	0			59.5839	0			87.1902	0			87.9345	0			91.7507	0			92.0034	0			91.4173	0			86.6676	0			86.1068	0			86.1068
	72.935	0			91.4175	0			93.5845	0			67.7515	0			59.5843	0			87.1904	0			87.935	0			91.7512	0			92.0035	0			91.4175	0			86.668	0			86.1069	0			86.1069
	72.935	1			91.4175	1			93.5845	1			67.7515	1			59.5843	1			87.1904	1			87.935	1			91.7512	1			92.0035	1			91.4175	1			86.668	1			86.1069	1			86.1069
	72.9355	1			91.4177	1			93.5849	1			67.7519	1			59.5846	1			87.1905	1			87.9355	1			91.7516	1			92.0035	1			91.4177	1			86.6684	1			86.107	1			86.107
	72.9355	0			91.4177	0			93.5849	0			67.7519	0			59.5846	0			87.1905	0			87.9355	0			91.7516	0			92.0035	0			91.4177	0			86.6684	0			86.107	0			86.107
	72.936	0			91.418	0			93.5852	0			67.7524	0			59.585	0			87.1907	0			87.936	0			91.7521	0			92.0036	0			91.418	0			86.6688	0			86.1071	0			86.1071
	72.936	1			91.418	1			93.5852	1			67.7524	1			59.585	1			87.1907	1			87.936	1			91.7521	1			92.0036	1			91.418	1			86.6688	1			86.1071	1			86.1071
	72.9365	1			91.4183	1			93.5855	1			67.7528	1			59.5853	1			87.1908	1			87.9365	1			91.7525	1			92.0036	1			91.4183	1			86.6692	1			86.1072	1			86.1072
	72.9365	0			91.4183	0			93.5855	0			67.7528	0			59.5853	0			87.1908	0			87.9365	0			91.7525	0			92.0036	0			91.4183	0			86.6692	0			86.1072	0			86.1072
	72.937	0			91.4185	0			93.5859	0			67.7533	0			59.5856	0			87.191	0			87.937	0			91.753	0			92.0037	0			91.4185	0			86.6696	0			86.1073	0			86.1073
	72.937	1			91.4185	1			93.5859	1			67.7533	1			59.5856	1			87.191	1			87.937	1			91.753	1			92.0037	1			91.4185	1			86.6696	1			86.1073	1			86.1073
	72.9375	1			91.4188	1			93.5863	1			67.7537	1			59.586	1			87.1911	1			87.9375	1			91.7534	1			92.0037	1			91.4188	1			86.67	1			86.1074	1			86.1074
	72.9375	0			91.4188	0			93.5863	0			67.7537	0			59.586	0			87.1911	0			87.9375	0			91.7534	0			92.0037	0			91.4188	0			86.67	0			86.1074	0			86.1074
	72.938	0			91.419	0			93.5866	0			67.7542	0			59.5863	0			87.1913	0			87.938	0			91.7539	0			92.0038	0			91.419	0			86.6704	0			86.1075	0			86.1075
	72.938	1			91.419	1			93.5866	1			67.7542	1			59.5863	1			87.1913	1			87.938	1			91.7539	1			92.0038	1			91.419	1			86.6704	1			86.1075	1			86.1075
	72.9385	1			91.4193	1			93.587	1			67.7546	1			59.5867	1			87.1914	1			87.9385	1			91.7543	1			92.0038	1			91.4193	1			86.6708	1			86.1076	1			86.1076
	72.9385	0			91.4193	0			93.587	0			67.7546	0			59.5867	0			87.1914	0			87.9385	0			91.7543	0			92.0038	0			91.4193	0			86.6708	0			86.1076	0			86.1076
	72.939	0			91.4195	0			93.5873	0			67.7551	0			59.587	0			87.1916	0			87.939	0			91.7548	0			92.0039	0			91.4195	0			86.6712	0			86.1077	0			86.1077
	72.939	1			91.4195	1			93.5873	1			67.7551	1			59.587	1			87.1916	1			87.939	1			91.7548	1			92.0039	1			91.4195	1			86.6712	1			86.1077	1			86.1077
	72.9395	1			91.4198	1			93.5876	1			67.7555	1			59.5874	1			87.1917	1			87.9395	1			91.7552	1			92.0039	1			91.4198	1			86.6716	1			86.1078	1			86.1078
	72.9395	0			91.4198	0			93.5876	0			67.7555	0			59.5874	0			87.1917	0			87.9395	0			91.7552	0			92.0039	0			91.4198	0			86.6716	0			86.1078	0			86.1078
	72.94	0			91.42	0			93.588	0			67.756	0			59.5877	0			87.1919	0			87.94	0			91.7556	0			92.004	0			91.42	0			86.672	0			86.1079	0			86.1079
	72.94	1			91.42	1			93.588	1			67.756	1			59.5877	1			87.1919	1			87.94	1			91.7556	1			92.004	1			91.42	1			86.672	1			86.1079	1			86.1079
	72.9405	1			91.4203	1			93.5884	1			67.7565	1			59.5881	1			87.192	1			87.9405	1			91.7561	1			92.004	1			91.4203	1			86.6724	1			86.108	1			86.108
	72.9405	0			91.4203	0			93.5884	0			67.7565	0			59.5881	0			87.192	0			87.9405	0			91.7561	0			92.004	0			91.4203	0			86.6724	0			86.108	0			86.108
	72.941	0			91.4205	0			93.5887	0			67.7569	0			59.5884	0			87.1922	0			87.941	0			91.7565	0			92.0041	0			91.4205	0			86.6728	0			86.1081	0			86.1081
	72.941	1			91.4205	1			93.5887	1			67.7569	1			59.5884	1			87.1922	1			87.941	1			91.7565	1			92.0041	1			91.4205	1			86.6728	1			86.1081	1			86.1081
	72.9415	1			91.4207	1			93.5891	1			67.7573	1			59.5888	1			87.1923	1			87.9415	1			91.757	1			92.0041	1			91.4207	1			86.6732	1			86.1082	1			86.1082
	72.9415	0			91.4207	0			93.5891	0			67.7573	0			59.5888	0			87.1923	0			87.9415	0			91.757	0			92.0041	0			91.4207	0			86.6732	0			86.1082	0			86.1082
	72.942	0			91.421	0			93.5894	0			67.7578	0			59.5891	0			87.1925	0			87.942	0			91.7574	0			92.0042	0			91.421	0			86.6736	0			86.1083	0			86.1083
	72.942	1			91.421	1			93.5894	1			67.7578	1			59.5891	1			87.1925	1			87.942	1			91.7574	1			92.0042	1			91.421	1			86.6736	1			86.1083	1			86.1083
	72.9425	1			91.4213	1			93.5897	1			67.7582	1			59.5895	1			87.1926	1			87.9425	1			91.7579	1			92.0042	1			91.4213	1			86.674	1			86.1084	1			86.1084
	72.9425	0			91.4213	0			93.5897	0			67.7582	0			59.5895	0			87.1926	0			87.9425	0			91.7579	0			92.0042	0			91.4213	0			86.674	0			86.1084	0			86.1084
	72.943	0			91.4215	0			93.5901	0			67.7587	0			59.5898	0			87.1928	0			87.943	0			91.7583	0			92.0043	0			91.4215	0			86.6744	0			86.1085	0			86.1085
	72.943	1			91.4215	1			93.5901	1			67.7587	1			59.5898	1			87.1928	1			87.943	1			91.7583	1			92.0043	1			91.4215	1			86.6744	1			86.1085	1			86.1085
	72.9435	1			91.4218	1			93.5905	1			67.7591	1			59.5901	1			87.1929	1			87.9435	1			91.7588	1			92.0043	1			91.4218	1			86.6748	1			86.1086	1			86.1086
	72.9435	0			91.4218	0			93.5905	0			67.7591	0			59.5901	0			87.1929	0			87.9435	0			91.7588	0			92.0043	0			91.4218	0			86.6748	0			86.1086	0			86.1086
	72.944	0			91.422	0			93.5908	0			67.7596	0			59.5905	0			87.1931	0			87.944	0			91.7592	0			92.0044	0			91.422	0			86.6752	0			86.1087	0			86.1087
	72.944	1			91.422	1			93.5908	1			67.7596	1			59.5905	1			87.1931	1			87.944	1			91.7592	1			92.0044	1			91.422	1			86.6752	1			86.1087	1			86.1087
	72.9445	1			91.4223	1			93.5911	1			67.76	1			59.5908	1			87.1932	1			87.9445	1			91.7597	1			92.0044	1			91.4223	1			86.6756	1			86.1088	1			86.1088
	72.9445	0			91.4223	0			93.5911	0			67.76	0			59.5908	0			87.1932	0			87.9445	0			91.7597	0			92.0044	0			91.4223	0			86.6756	0			86.1088	0			86.1088
	72.945	0			91.4225	0			93.5915	0			67.7605	0			59.5912	0			87.1934	0			87.945	0			91.7601	0			92.0045	0			91.4225	0			86.676	0			86.1089	0			86.1089
	72.945	1			91.4225	1			93.5915	1			67.7605	1			59.5912	1			87.1934	1			87.945	1			91.7601	1			92.0045	1			91.4225	1			86.676	1			86.1089	1			86.1089
	72.9455	1			91.4228	1			93.5918	1			67.7609	1			59.5915	1			87.1935	1			87.9455	1			91.7605	1			92.0045	1			91.4228	1			86.6764	1			86.109	1			86.109
	72.9455	0			91.4228	0			93.5918	0			67.7609	0			59.5915	0			87.1935	0			87.9455	0			91.7605	0			92.0045	0			91.4228	0			86.6764	0			86.109	0			86.109
	72.946	0			91.423	0			93.5922	0			67.7614	0			59.5919	0			87.1937	0			87.946	0			91.761	0			92.0046	0			91.423	0			86.6768	0			86.1091	0			86.1091
	72.946	1			91.423	1			93.5922	1			67.7614	1			59.5919	1			87.1937	1			87.946	1			91.761	1			92.0046	1			91.423	1			86.6768	1			86.1091	1			86.1091
	72.9465	1			91.4233	1			93.5926	1			67.7618	1			59.5922	1			87.1938	1			87.9465	1			91.7614	1			92.0046	1			91.4233	1			86.6772	1			86.1092	1			86.1092
	72.9465	0			91.4233	0			93.5926	0			67.7618	0			59.5922	0			87.1938	0			87.9465	0			91.7614	0			92.0046	0			91.4233	0			86.6772	0			86.1092	0			86.1092
	72.947	0			91.4235	0			93.5929	0			67.7623	0			59.5926	0			87.194	0			87.947	0			91.7619	0			92.0047	0			91.4235	0			86.6776	0			86.1093	0			86.1093
	72.947	1			91.4235	1			93.5929	1			67.7623	1			59.5926	1			87.194	1			87.947	1			91.7619	1			92.0047	1			91.4235	1			86.6776	1			86.1093	1			86.1093
	72.9475	1			91.4237	1			93.5932	1			67.7627	1			59.5929	1			87.1941	1			87.9475	1			91.7623	1			92.0047	1			91.4237	1			86.678	1			86.1094	1			86.1094
	72.9475	0			91.4237	0			93.5932	0			67.7627	0			59.5929	0			87.1941	0			87.9475	0			91.7623	0			92.0047	0			91.4237	0			86.678	0			86.1094	0			86.1094
	72.948	0			91.424	0			93.5936	0			67.7632	0			59.5933	0			87.1943	0			87.948	0			91.7628	0			92.0048	0			91.424	0			86.6784	0			86.1095	0			86.1095
	72.948	1			91.424	1			93.5936	1			67.7632	1			59.5933	1			87.1943	1			87.948	1			91.7628	1			92.0048	1			91.424	1			86.6784	1			86.1095	1			86.1095
	72.9485	1			91.4243	1			93.5939	1			67.7636	1			59.5936	1			87.1944	1			87.9485	1			91.7632	1			92.0048	1			91.4243	1			86.6788	1			86.1096	1			86.1096
	72.9485	0			91.4243	0			93.5939	0			67.7636	0			59.5936	0			87.1944	0			87.9485	0			91.7632	0			92.0048	0			91.4243	0			86.6788	0			86.1096	0			86.1096
	72.949	0			91.4245	0			93.5943	0			67.7641	0			59.594	0			87.1946	0			87.949	0			91.7637	0			92.0049	0			91.4245	0			86.6792	0			86.1097	0			86.1097
	72.949	1			91.4245	1			93.5943	1			67.7641	1			59.594	1			87.1946	1			87.949	1			91.7637	1			92.0049	1			91.4245	1			86.6792	1			86.1097	1			86.1097
	72.9495	1			91.4248	1			93.5947	1			67.7645	1			59.5943	1			87.1947	1			87.9495	1			91.7641	1			92.0049	1			91.4248	1			86.6796	1			86.1098	1			86.1098
	72.9495	0			91.4248	0			93.5947	0			67.7645	0			59.5943	0			87.1947	0			87.9495	0			91.7641	0			92.0049	0			91.4248	0			86.6796	0			86.1098	0			86.1098
	72.95	0			91.425	0			93.595	0			67.765	0			59.5947	0			87.1949	0			87.95	0			91.7646	0			92.005	0			91.425	0			86.68	0			86.1099	0			86.1099
	72.95	1			91.425	1			93.595	1			67.765	1			59.5947	1			87.1949	1			87.95	1			91.7646	1			92.005	1			91.425	1			86.68	1			86.1099	1			86.1099
	72.9505	1			91.4253	1			93.5953	1			67.7654	1			59.595	1			87.195	1			87.9505	1			91.765	1			92.005	1			91.4253	1			86.6804	1			86.11	1			86.11
	72.9505	0			91.4253	0			93.5953	0			67.7654	0			59.595	0			87.195	0			87.9505	0			91.765	0			92.005	0			91.4253	0			86.6804	0			86.11	0			86.11
	72.951	0			91.4255	0			93.5957	0			67.7659	0			59.5953	0			87.1951	0			87.951	0			91.7654	0			92.005	0			91.4255	0			86.6808	0			86.1101	0			86.1101
	72.951	1			91.4255	1			93.5957	1			67.7659	1			59.5953	1			87.1951	1			87.951	1			91.7654	1			92.005	1			91.4255	1			86.6808	1			86.1101	1			86.1101
	72.9515	1			91.4258	1			93.5961	1			67.7663	1			59.5957	1			87.1953	1			87.9515	1			91.7659	1			92.0051	1			91.4258	1			86.6812	1			86.1102	1			86.1102
	72.9515	0			91.4258	0			93.5961	0			67.7663	0			59.5957	0			87.1953	0			87.9515	0			91.7659	0			92.0051	0			91.4258	0			86.6812	0			86.1102	0			86.1102
	72.952	0			91.426	0			93.5964	0			67.7668	0			59.596	0			87.1954	0			87.952	0			91.7663	0			92.0051	0			91.426	0			86.6816	0			86.1103	0			86.1103
	72.952	1			91.426	1			93.5964	1			67.7668	1			59.596	1			87.1954	1			87.952	1			91.7663	1			92.0051	1			91.426	1			86.6816	1			86.1103	1			86.1103
	72.9525	1			91.4263	1			93.5968	1			67.7672	1			59.5964	1			87.1956	1			87.9525	1			91.7668	1			92.0052	1			91.4263	1			86.682	1			86.1104	1			86.1104
	72.9525	0			91.4263	0			93.5968	0			67.7672	0			59.5964	0			87.1956	0			87.9525	0			91.7668	0			92.0052	0			91.4263	0			86.682	0			86.1104	0			86.1104
	72.953	0			91.4265	0			93.5971	0			67.7677	0			59.5967	0			87.1957	0			87.953	0			91.7672	0			92.0052	0			91.4265	0			86.6824	0			86.1105	0			86.1105
	72.953	1			91.4265	1			93.5971	1			67.7677	1			59.5967	1			87.1957	1			87.953	1			91.7672	1			92.0052	1			91.4265	1			86.6824	1			86.1105	1			86.1105
	72.9535	1			91.4267	1			93.5974	1			67.7681	1			59.5971	1			87.1959	1			87.9535	1			91.7677	1			92.0053	1			91.4267	1			86.6828	1			86.1106	1			86.1106
	72.9535	0			91.4267	0			93.5974	0			67.7681	0			59.5971	0			87.1959	0			87.9535	0			91.7677	0			92.0053	0			91.4267	0			86.6828	0			86.1106	0			86.1106
	72.954	0			91.427	0			93.5978	0			67.7686	0			59.5974	0			87.196	0			87.954	0			91.7681	0			92.0053	0			91.427	0			86.6832	0			86.1107	0			86.1107
	72.954	1			91.427	1			93.5978	1			67.7686	1			59.5974	1			87.196	1			87.954	1			91.7681	1			92.0053	1			91.427	1			86.6832	1			86.1107	1			86.1107
	72.9545	1			91.4273	1			93.5982	1			67.769	1			59.5978	1			87.1962	1			87.9545	1			91.7686	1			92.0054	1			91.4273	1			86.6836	1			86.1108	1			86.1108
	72.9545	0			91.4273	0			93.5982	0			67.769	0			59.5978	0			87.1962	0			87.9545	0			91.7686	0			92.0054	0			91.4273	0			86.6836	0			86.1108	0			86.1108
	72.955	0			91.4275	0			93.5985	0			67.7695	0			59.5981	0			87.1963	0			87.955	0			91.769	0			92.0054	0			91.4275	0			86.684	0			86.1109	0			86.1109
	72.955	1			91.4275	1			93.5985	1			67.7695	1			59.5981	1			87.1963	1			87.955	1			91.769	1			92.0054	1			91.4275	1			86.684	1			86.1109	1			86.1109
	72.9555	1			91.4278	1			93.5988	1			67.7699	1			59.5985	1			87.1965	1			87.9555	1			91.7695	1			92.0055	1			91.4278	1			86.6844	1			86.111	1			86.111
	72.9555	0			91.4278	0			93.5988	0			67.7699	0			59.5985	0			87.1965	0			87.9555	0			91.7695	0			92.0055	0			91.4278	0			86.6844	0			86.111	0			86.111
	72.956	0			91.428	0			93.5992	0			67.7704	0			59.5988	0			87.1966	0			87.956	0			91.7699	0			92.0055	0			91.428	0			86.6848	0			86.1111	0			86.1111
	72.956	1			91.428	1			93.5992	1			67.7704	1			59.5988	1			87.1966	1			87.956	1			91.7699	1			92.0055	1			91.428	1			86.6848	1			86.1111	1			86.1111
	72.9565	1			91.4283	1			93.5995	1			67.7708	1			59.5992	1			87.1968	1			87.9565	1			91.7703	1			92.0056	1			91.4283	1			86.6852	1			86.1112	1			86.1112
	72.9565	0			91.4283	0			93.5995	0			67.7708	0			59.5992	0			87.1968	0			87.9565	0			91.7703	0			92.0056	0			91.4283	0			86.6852	0			86.1112	0			86.1112
	72.957	0			91.4285	0			93.5999	0			67.7713	0			59.5995	0			87.1969	0			87.957	0			91.7708	0			92.0056	0			91.4285	0			86.6856	0			86.1113	0			86.1113
	72.957	1			91.4285	1			93.5999	1			67.7713	1			59.5995	1			87.1969	1			87.957	1			91.7708	1			92.0056	1			91.4285	1			86.6856	1			86.1113	1			86.1113
	72.9575	1			91.4288	1			93.6003	1			67.7717	1			59.5999	1			87.1971	1			87.9575	1			91.7712	1			92.0057	1			91.4288	1			86.686	1			86.1114	1			86.1114
	72.9575	0			91.4288	0			93.6003	0			67.7717	0			59.5999	0			87.1971	0			87.9575	0			91.7712	0			92.0057	0			91.4288	0			86.686	0			86.1114	0			86.1114
	72.958	0			91.429	0			93.6006	0			67.7722	0			59.6002	0			87.1972	0			87.958	0			91.7717	0			92.0057	0			91.429	0			86.6864	0			86.1115	0			86.1115
	72.958	1			91.429	1			93.6006	1			67.7722	1			59.6002	1			87.1972	1			87.958	1			91.7717	1			92.0057	1			91.429	1			86.6864	1			86.1115	1			86.1115
	72.9585	1			91.4293	1			93.6009	1			67.7726	1			59.6005	1			87.1974	1			87.9585	1			91.7721	1			92.0058	1			91.4293	1			86.6868	1			86.1116	1			86.1116
	72.9585	0			91.4293	0			93.6009	0			67.7726	0			59.6005	0			87.1974	0			87.9585	0			91.7721	0			92.0058	0			91.4293	0			86.6868	0			86.1116	0			86.1116
	72.959	0			91.4295	0			93.6013	0			67.7731	0			59.6009	0			87.1975	0			87.959	0			91.7726	0			92.0058	0			91.4295	0			86.6872	0			86.1117	0			86.1117
	72.959	1			91.4295	1			93.6013	1			67.7731	1			59.6009	1			87.1975	1			87.959	1			91.7726	1			92.0058	1			91.4295	1			86.6872	1			86.1117	1			86.1117
	72.9595	1			91.4297	1			93.6016	1			67.7735	1			59.6012	1			87.1977	1			87.9595	1			91.773	1			92.0059	1			91.4297	1			86.6876	1			86.1118	1			86.1118
	72.9595	0			91.4297	0			93.6016	0			67.7735	0			59.6012	0			87.1977	0			87.9595	0			91.773	0			92.0059	0			91.4297	0			86.6876	0			86.1118	0			86.1118
	72.96	0			91.43	0			93.602	0			67.774	0			59.6016	0			87.1978	0			87.96	0			91.7735	0			92.0059	0			91.43	0			86.688	0			86.1119	0			86.1119
	72.96	1			91.43	1			93.602	1			67.774	1			59.6016	1			87.1978	1			87.96	1			91.7735	1			92.0059	1			91.43	1			86.688	1			86.1119	1			86.1119
	72.9605	1			91.4303	1			93.6024	1			67.7744	1			59.6019	1			87.198	1			87.9605	1			91.7739	1			92.006	1			91.4303	1			86.6884	1			86.112	1			86.112
	72.9605	0			91.4303	0			93.6024	0			67.7744	0			59.6019	0			87.198	0			87.9605	0			91.7739	0			92.006	0			91.4303	0			86.6884	0			86.112	0			86.112
	72.961	0			91.4305	0			93.6027	0			67.7749	0			59.6023	0			87.1981	0			87.961	0			91.7744	0			92.006	0			91.4305	0			86.6888	0			86.1121	0			86.1121
	72.961	1			91.4305	1			93.6027	1			67.7749	1			59.6023	1			87.1981	1			87.961	1			91.7744	1			92.006	1			91.4305	1			86.6888	1			86.1121	1			86.1121
	72.9615	1			91.4308	1			93.603	1			67.7753	1			59.6026	1			87.1983	1			87.9615	1			91.7748	1			92.0061	1			91.4308	1			86.6892	1			86.1122	1			86.1122
	72.9615	0			91.4308	0			93.603	0			67.7753	0			59.6026	0			87.1983	0			87.9615	0			91.7748	0			92.0061	0			91.4308	0			86.6892	0			86.1122	0			86.1122
	72.962	0			91.431	0			93.6034	0			67.7758	0			59.603	0			87.1984	0			87.962	0			91.7752	0			92.0061	0			91.431	0			86.6896	0			86.1123	0			86.1123
	72.962	1			91.431	1			93.6034	1			67.7758	1			59.603	1			87.1984	1			87.962	1			91.7752	1			92.0061	1			91.431	1			86.6896	1			86.1123	1			86.1123
	72.9625	1			91.4313	1			93.6037	1			67.7762	1			59.6033	1			87.1986	1			87.9625	1			91.7757	1			92.0062	1			91.4313	1			86.69	1			86.1124	1			86.1124
	72.9625	0			91.4313	0			93.6037	0			67.7762	0			59.6033	0			87.1986	0			87.9625	0			91.7757	0			92.0062	0			91.4313	0			86.69	0			86.1124	0			86.1124
	72.963	0			91.4315	0			93.6041	0			67.7767	0			59.6037	0			87.1987	0			87.963	0			91.7761	0			92.0062	0			91.4315	0			86.6904	0			86.1125	0			86.1125
	72.963	1			91.4315	1			93.6041	1			67.7767	1			59.6037	1			87.1987	1			87.963	1			91.7761	1			92.0062	1			91.4315	1			86.6904	1			86.1125	1			86.1125
	72.9635	1			91.4318	1			93.6044	1			67.7771	1			59.604	1			87.1989	1			87.9635	1			91.7766	1			92.0063	1			91.4318	1			86.6908	1			86.1126	1			86.1126
	72.9635	0			91.4318	0			93.6044	0			67.7771	0			59.604	0			87.1989	0			87.9635	0			91.7766	0			92.0063	0			91.4318	0			86.6908	0			86.1126	0			86.1126
	72.964	0			91.432	0			93.6048	0			67.7776	0			59.6044	0			87.199	0			87.964	0			91.777	0			92.0063	0			91.432	0			86.6912	0			86.1127	0			86.1127
	72.964	1			91.432	1			93.6048	1			67.7776	1			59.6044	1			87.199	1			87.964	1			91.777	1			92.0063	1			91.432	1			86.6912	1			86.1127	1			86.1127
	72.9645	1			91.4323	1			93.6051	1			67.778	1			59.6047	1			87.1992	1			87.9645	1			91.7775	1			92.0064	1			91.4323	1			86.6916	1			86.1128	1			86.1128
	72.9645	0			91.4323	0			93.6051	0			67.778	0			59.6047	0			87.1992	0			87.9645	0			91.7775	0			92.0064	0			91.4323	0			86.6916	0			86.1128	0			86.1128
	72.965	0			91.4325	0			93.6055	0			67.7785	0			59.605	0			87.1993	0			87.965	0			91.7779	0			92.0064	0			91.4325	0			86.692	0			86.1129	0			86.1129
	72.965	1			91.4325	1			93.6055	1			67.7785	1			59.605	1			87.1993	1			87.965	1			91.7779	1			92.0064	1			91.4325	1			86.692	1			86.1129	1			86.1129
	72.9655	1			91.4327	1			93.6059	1			67.7789	1			59.6054	1			87.1995	1			87.9655	1			91.7784	1			92.0065	1			91.4327	1			86.6924	1			86.113	1			86.113
	72.9655	0			91.4327	0			93.6059	0			67.7789	0			59.6054	0			87.1995	0			87.9655	0			91.7784	0			92.0065	0			91.4327	0			86.6924	0			86.113	0			86.113
	72.966	0			91.433	0			93.6062	0			67.7794	0			59.6057	0			87.1996	0			87.966	0			91.7788	0			92.0065	0			91.433	0			86.6928	0			86.1131	0			86.1131
	72.966	1			91.433	1			93.6062	1			67.7794	1			59.6057	1			87.1996	1			87.966	1			91.7788	1			92.0065	1			91.433	1			86.6928	1			86.1131	1			86.1131
	72.9665	1			91.4333	1			93.6065	1			67.7798	1			59.6061	1			87.1998	1			87.9665	1			91.7793	1			92.0066	1			91.4333	1			86.6932	1			86.1132	1			86.1132
	72.9665	0			91.4333	0			93.6065	0			67.7798	0			59.6061	0			87.1998	0			87.9665	0			91.7793	0			92.0066	0			91.4333	0			86.6932	0			86.1132	0			86.1132
	72.967	0			91.4335	0			93.6069	0			67.7803	0			59.6064	0			87.1999	0			87.967	0			91.7797	0			92.0066	0			91.4335	0			86.6936	0			86.1133	0			86.1133
	72.967	1			91.4335	1			93.6069	1			67.7803	1			59.6064	1			87.1999	1			87.967	1			91.7797	1			92.0066	1			91.4335	1			86.6936	1			86.1133	1			86.1133
	72.9675	1			91.4338	1			93.6072	1			67.7807	1			59.6068	1			87.2	1			87.9675	1			91.7801	1			92.0067	1			91.4338	1			86.694	1			86.1134	1			86.1134
	72.9675	0			91.4338	0			93.6072	0			67.7807	0			59.6068	0			87.2	0			87.9675	0			91.7801	0			92.0067	0			91.4338	0			86.694	0			86.1134	0			86.1134
	72.968	0			91.434	0			93.6076	0			67.7812	0			59.6071	0			87.2002	0			87.968	0			91.7806	0			92.0067	0			91.434	0			86.6944	0			86.1135	0			86.1135
	72.968	1			91.434	1			93.6076	1			67.7812	1			59.6071	1			87.2002	1			87.968	1			91.7806	1			92.0067	1			91.434	1			86.6944	1			86.1135	1			86.1135
	72.9685	1			91.4343	1			93.608	1			67.7816	1			59.6075	1			87.2003	1			87.9685	1			91.781	1			92.0068	1			91.4343	1			86.6948	1			86.1136	1			86.1136
	72.9685	0			91.4343	0			93.608	0			67.7816	0			59.6075	0			87.2003	0			87.9685	0			91.781	0			92.0068	0			91.4343	0			86.6948	0			86.1136	0			86.1136
	72.969	0			91.4345	0			93.6083	0			67.7821	0			59.6078	0			87.2005	0			87.969	0			91.7815	0			92.0068	0			91.4345	0			86.6952	0			86.1137	0			86.1137
	72.969	1			91.4345	1			93.6083	1			67.7821	1			59.6078	1			87.2005	1			87.969	1			91.7815	1			92.0068	1			91.4345	1			86.6952	1			86.1137	1			86.1137
	72.9695	1			91.4348	1			93.6086	1			67.7825	1			59.6082	1			87.2006	1			87.9695	1			91.7819	1			92.0069	1			91.4348	1			86.6956	1			86.1138	1			86.1138
	72.9695	0			91.4348	0			93.6086	0			67.7825	0			59.6082	0			87.2006	0			87.9695	0			91.7819	0			92.0069	0			91.4348	0			86.6956	0			86.1138	0			86.1138
	72.97	0			91.435	0			93.609	0			67.783	0			59.6085	0			87.2008	0			87.97	0			91.7824	0			92.0069	0			91.435	0			86.696	0			86.1139	0			86.1139
	72.97	1			91.435	1			93.609	1			67.783	1			59.6085	1			87.2008	1			87.97	1			91.7824	1			92.0069	1			91.435	1			86.696	1			86.1139	1			86.1139
	72.9705	1			91.4353	1			93.6093	1			67.7834	1			59.6089	1			87.2009	1			87.9705	1			91.7828	1			92.007	1			91.4353	1			86.6964	1			86.114	1			86.114
	72.9705	0			91.4353	0			93.6093	0			67.7834	0			59.6089	0			87.2009	0			87.9705	0			91.7828	0			92.007	0			91.4353	0			86.6964	0			86.114	0			86.114
	72.971	0			91.4355	0			93.6097	0			67.7839	0			59.6092	0			87.2011	0			87.971	0			91.7833	0			92.007	0			91.4355	0			86.6968	0			86.1141	0			86.1141
	72.971	1			91.4355	1			93.6097	1			67.7839	1			59.6092	1			87.2011	1			87.971	1			91.7833	1			92.007	1			91.4355	1			86.6968	1			86.1141	1			86.1141
	72.9715	1			91.4357	1			93.6101	1			67.7843	1			59.6096	1			87.2012	1			87.9715	1			91.7837	1			92.0071	1			91.4357	1			86.6972	1			86.1142	1			86.1142
	72.9715	0			91.4357	0			93.6101	0			67.7843	0			59.6096	0			87.2012	0			87.9715	0			91.7837	0			92.0071	0			91.4357	0			86.6972	0			86.1142	0			86.1142
	72.972	0			91.436	0			93.6104	0			67.7848	0			59.6099	0			87.2014	0			87.972	0			91.7842	0			92.0071	0			91.436	0			86.6976	0			86.1143	0			86.1143
	72.972	1			91.436	1			93.6104	1			67.7848	1			59.6099	1			87.2014	1			87.972	1			91.7842	1			92.0071	1			91.436	1			86.6976	1			86.1143	1			86.1143
	72.9725	1			91.4363	1			93.6107	1			67.7852	1			59.6102	1			87.2015	1			87.9725	1			91.7846	1			92.0072	1			91.4363	1			86.698	1			86.1144	1			86.1144
	72.9725	0			91.4363	0			93.6107	0			67.7852	0			59.6102	0			87.2015	0			87.9725	0			91.7846	0			92.0072	0			91.4363	0			86.698	0			86.1144	0			86.1144
	72.973	0			91.4365	0			93.6111	0			67.7857	0			59.6106	0			87.2017	0			87.973	0			91.785	0			92.0072	0			91.4365	0			86.6984	0			86.1145	0			86.1145
	72.973	1			91.4365	1			93.6111	1			67.7857	1			59.6106	1			87.2017	1			87.973	1			91.785	1			92.0072	1			91.4365	1			86.6984	1			86.1145	1			86.1145
	72.9735	1			91.4368	1			93.6114	1			67.7861	1			59.6109	1			87.2018	1			87.9735	1			91.7855	1			92.0073	1			91.4368	1			86.6988	1			86.1146	1			86.1146
	72.9735	0			91.4368	0			93.6114	0			67.7861	0			59.6109	0			87.2018	0			87.9735	0			91.7855	0			92.0073	0			91.4368	0			86.6988	0			86.1146	0			86.1146
	72.974	0			91.437	0			93.6118	0			67.7866	0			59.6113	0			87.202	0			87.974	0			91.7859	0			92.0073	0			91.437	0			86.6992	0			86.1147	0			86.1147
	72.974	1			91.437	1			93.6118	1			67.7866	1			59.6113	1			87.202	1			87.974	1			91.7859	1			92.0073	1			91.437	1			86.6992	1			86.1147	1			86.1147
	72.9745	1			91.4373	1			93.6121	1			67.787	1			59.6116	1			87.2021	1			87.9745	1			91.7864	1			92.0074	1			91.4373	1			86.6996	1			86.1148	1			86.1148
	72.9745	0			91.4373	0			93.6121	0			67.787	0			59.6116	0			87.2021	0			87.9745	0			91.7864	0			92.0074	0			91.4373	0			86.6996	0			86.1148	0			86.1148
	72.975	0			91.4375	0			93.6125	0			67.7875	0			59.612	0			87.2023	0			87.975	0			91.7868	0			92.0074	0			91.4375	0			86.7	0			86.1149	0			86.1149
	72.975	1			91.4375	1			93.6125	1			67.7875	1			59.612	1			87.2023	1			87.975	1			91.7868	1			92.0074	1			91.4375	1			86.7	1			86.1149	1			86.1149
	72.9755	1			91.4378	1			93.6128	1			67.7879	1			59.6123	1			87.2024	1			87.9755	1			91.7873	1			92.0075	1			91.4378	1			86.7004	1			86.115	1			86.115
	72.9755	0			91.4378	0			93.6128	0			67.7879	0			59.6123	0			87.2024	0			87.9755	0			91.7873	0			92.0075	0			91.4378	0			86.7004	0			86.115	0			86.115
	72.976	0			91.438	0			93.6132	0			67.7884	0			59.6127	0			87.2026	0			87.976	0			91.7877	0			92.0075	0			91.438	0			86.7008	0			86.115	0			86.115
	72.976	1			91.438	1			93.6132	1			67.7884	1			59.6127	1			87.2026	1			87.976	1			91.7877	1			92.0075	1			91.438	1			86.7008	1			86.115	1			86.115
	72.9765	1			91.4382	1			93.6136	1			67.7888	1			59.613	1			87.2027	1			87.9765	1			91.7882	1			92.0076	1			91.4382	1			86.7012	1			86.1151	1			86.1151
	72.9765	0			91.4382	0			93.6136	0			67.7888	0			59.613	0			87.2027	0			87.9765	0			91.7882	0			92.0076	0			91.4382	0			86.7012	0			86.1151	0			86.1151
	72.977	0			91.4385	0			93.6139	0			67.7893	0			59.6134	0			87.2029	0			87.977	0			91.7886	0			92.0076	0			91.4385	0			86.7016	0			86.1152	0			86.1152
	72.977	1			91.4385	1			93.6139	1			67.7893	1			59.6134	1			87.2029	1			87.977	1			91.7886	1			92.0076	1			91.4385	1			86.7016	1			86.1152	1			86.1152
	72.9775	1			91.4387	1			93.6142	1			67.7897	1			59.6137	1			87.203	1			87.9775	1			91.7891	1			92.0077	1			91.4387	1			86.702	1			86.1153	1			86.1153
	72.9775	0			91.4387	0			93.6142	0			67.7897	0			59.6137	0			87.203	0			87.9775	0			91.7891	0			92.0077	0			91.4387	0			86.702	0			86.1153	0			86.1153
	72.978	0			91.439	0			93.6146	0			67.7902	0			59.6141	0			87.2032	0			87.978	0			91.7895	0			92.0077	0			91.439	0			86.7024	0			86.1154	0			86.1154
	72.978	1			91.439	1			93.6146	1			67.7902	1			59.6141	1			87.2032	1			87.978	1			91.7895	1			92.0077	1			91.439	1			86.7024	1			86.1154	1			86.1154
	72.9785	1			91.4393	1			93.6149	1			67.7906	1			59.6144	1			87.2033	1			87.9785	1			91.79	1			92.0078	1			91.4393	1			86.7028	1			86.1155	1			86.1155
	72.9785	0			91.4393	0			93.6149	0			67.7906	0			59.6144	0			87.2033	0			87.9785	0			91.79	0			92.0078	0			91.4393	0			86.7028	0			86.1155	0			86.1155
	72.979	0			91.4395	0			93.6153	0			67.7911	0			59.6148	0			87.2035	0			87.979	0			91.7904	0			92.0078	0			91.4395	0			86.7032	0			86.1156	0			86.1156
	72.979	1			91.4395	1			93.6153	1			67.7911	1			59.6148	1			87.2035	1			87.979	1			91.7904	1			92.0078	1			91.4395	1			86.7032	1			86.1156	1			86.1156
	72.9795	1			91.4398	1			93.6157	1			67.7915	1			59.6151	1			87.2036	1			87.9795	1			91.7908	1			92.0079	1			91.4398	1			86.7036	1			86.1157	1			86.1157
	72.9795	0			91.4398	0			93.6157	0			67.7915	0			59.6151	0			87.2036	0			87.9795	0			91.7908	0			92.0079	0			91.4398	0			86.7036	0			86.1157	0			86.1157
	72.98	0			91.44	0			93.616	0			67.792	0			59.6154	0			87.2038	0			87.98	0			91.7913	0			92.0079	0			91.44	0			86.704	0			86.1158	0			86.1158
	72.98	1			91.44	1			93.616	1			67.792	1			59.6154	1			87.2038	1			87.98	1			91.7913	1			92.0079	1			91.44	1			86.704	1			86.1158	1			86.1158
	72.9805	1			91.4403	1			93.6163	1			67.7924	1			59.6158	1			87.2039	1			87.9805	1			91.7917	1			92.008	1			91.4403	1			86.7044	1			86.1159	1			86.1159
	72.9805	0			91.4403	0			93.6163	0			67.7924	0			59.6158	0			87.2039	0			87.9805	0			91.7917	0			92.008	0			91.4403	0			86.7044	0			86.1159	0			86.1159
	72.981	0			91.4405	0			93.6167	0			67.7929	0			59.6161	0			87.2041	0			87.981	0			91.7922	0			92.008	0			91.4405	0			86.7048	0			86.116	0			86.116
	72.981	1			91.4405	1			93.6167	1			67.7929	1			59.6161	1			87.2041	1			87.981	1			91.7922	1			92.008	1			91.4405	1			86.7048	1			86.116	1			86.116
	72.9815	1			91.4408	1			93.617	1			67.7933	1			59.6165	1			87.2042	1			87.9815	1			91.7926	1			92.0081	1			91.4408	1			86.7052	1			86.1161	1			86.1161
	72.9815	0			91.4408	0			93.617	0			67.7933	0			59.6165	0			87.2042	0			87.9815	0			91.7926	0			92.0081	0			91.4408	0			86.7052	0			86.1161	0			86.1161
	72.982	0			91.441	0			93.6174	0			67.7938	0			59.6168	0			87.2044	0			87.982	0			91.7931	0			92.0081	0			91.441	0			86.7056	0			86.1162	0			86.1162
	72.982	1			91.441	1			93.6174	1			67.7938	1			59.6168	1			87.2044	1			87.982	1			91.7931	1			92.0081	1			91.441	1			86.7056	1			86.1162	1			86.1162
	72.9825	1			91.4412	1			93.6178	1			67.7942	1			59.6172	1			87.2045	1			87.9825	1			91.7935	1			92.0082	1			91.4412	1			86.706	1			86.1163	1			86.1163
	72.9825	0			91.4412	0			93.6178	0			67.7942	0			59.6172	0			87.2045	0			87.9825	0			91.7935	0			92.0082	0			91.4412	0			86.706	0			86.1163	0			86.1163
	72.983	0			91.4415	0			93.6181	0			67.7947	0			59.6175	0			87.2047	0			87.983	0			91.794	0			92.0082	0			91.4415	0			86.7064	0			86.1164	0			86.1164
	72.983	1			91.4415	1			93.6181	1			67.7947	1			59.6175	1			87.2047	1			87.983	1			91.794	1			92.0082	1			91.4415	1			86.7064	1			86.1164	1			86.1164
	72.9835	1			91.4417	1			93.6184	1			67.7951	1			59.6179	1			87.2048	1			87.9835	1			91.7944	1			92.0083	1			91.4417	1			86.7068	1			86.1165	1			86.1165
	72.9835	0			91.4417	0			93.6184	0			67.7951	0			59.6179	0			87.2048	0			87.9835	0			91.7944	0			92.0083	0			91.4417	0			86.7068	0			86.1165	0			86.1165
	72.984	0			91.442	0			93.6188	0			67.7956	0			59.6182	0			87.205	0			87.984	0			91.7949	0			92.0083	0			91.442	0			86.7072	0			86.1166	0			86.1166
	72.984	1			91.442	1			93.6188	1			67.7956	1			59.6182	1			87.205	1			87.984	1			91.7949	1			92.0083	1			91.442	1			86.7072	1			86.1166	1			86.1166
	72.9845	1			91.4423	1			93.6191	1			67.796	1			59.6186	1			87.2051	1			87.9845	1			91.7953	1			92.0084	1			91.4423	1			86.7076	1			86.1167	1			86.1167
	72.9845	0			91.4423	0			93.6191	0			67.796	0			59.6186	0			87.2051	0			87.9845	0			91.7953	0			92.0084	0			91.4423	0			86.7076	0			86.1167	0			86.1167
	72.985	0			91.4425	0			93.6195	0			67.7965	0			59.6189	0			87.2052	0			87.985	0			91.7957	0			92.0084	0			91.4425	0			86.708	0			86.1168	0			86.1168
	72.985	1			91.4425	1			93.6195	1			67.7965	1			59.6189	1			87.2052	1			87.985	1			91.7957	1			92.0084	1			91.4425	1			86.708	1			86.1168	1			86.1168
	72.9855	1			91.4428	1			93.6198	1			67.7969	1			59.6193	1			87.2054	1			87.9855	1			91.7962	1			92.0085	1			91.4428	1			86.7084	1			86.1169	1			86.1169
	72.9855	0			91.4428	0			93.6198	0			67.7969	0			59.6193	0			87.2054	0			87.9855	0			91.7962	0			92.0085	0			91.4428	0			86.7084	0			86.1169	0			86.1169
	72.986	0			91.443	0			93.6202	0			67.7974	0			59.6196	0			87.2055	0			87.986	0			91.7966	0			92.0085	0			91.443	0			86.7088	0			86.117	0			86.117
	72.986	1			91.443	1			93.6202	1			67.7974	1			59.6196	1			87.2055	1			87.986	1			91.7966	1			92.0085	1			91.443	1			86.7088	1			86.117	1			86.117
	72.9865	1			91.4433	1			93.6205	1			67.7978	1			59.62	1			87.2057	1			87.9865	1			91.7971	1			92.0086	1			91.4433	1			86.7092	1			86.1171	1			86.1171
	72.9865	0			91.4433	0			93.6205	0			67.7978	0			59.62	0			87.2057	0			87.9865	0			91.7971	0			92.0086	0			91.4433	0			86.7092	0			86.1171	0			86.1171
	72.987	0			91.4435	0			93.6209	0			67.7983	0			59.6203	0			87.2058	0			87.987	0			91.7975	0			92.0086	0			91.4435	0			86.7096	0			86.1172	0			86.1172
	72.987	1			91.4435	1			93.6209	1			67.7983	1			59.6203	1			87.2058	1			87.987	1			91.7975	1			92.0086	1			91.4435	1			86.7096	1			86.1172	1			86.1172
	72.9875	1			91.4438	1			93.6213	1			67.7987	1			59.6206	1			87.206	1			87.9875	1			91.798	1			92.0087	1			91.4438	1			86.71	1			86.1173	1			86.1173
	72.9875	0			91.4438	0			93.6213	0			67.7987	0			59.6206	0			87.206	0			87.9875	0			91.798	0			92.0087	0			91.4438	0			86.71	0			86.1173	0			86.1173
	72.988	0			91.444	0			93.6216	0			67.7992	0			59.621	0			87.2061	0			87.988	0			91.7984	0			92.0087	0			91.444	0			86.7104	0			86.1174	0			86.1174
	72.988	1			91.444	1			93.6216	1			67.7992	1			59.621	1			87.2061	1			87.988	1			91.7984	1			92.0087	1			91.444	1			86.7104	1			86.1174	1			86.1174
	72.9885	1			91.4442	1			93.6219	1			67.7996	1			59.6213	1			87.2063	1			87.9885	1			91.7989	1			92.0088	1			91.4442	1			86.7108	1			86.1175	1			86.1175
	72.9885	0			91.4442	0			93.6219	0			67.7996	0			59.6213	0			87.2063	0			87.9885	0			91.7989	0			92.0088	0			91.4442	0			86.7108	0			86.1175	0			86.1175
	72.989	0			91.4445	0			93.6223	0			67.8001	0			59.6217	0			87.2064	0			87.989	0			91.7993	0			92.0088	0			91.4445	0			86.7112	0			86.1176	0			86.1176
	72.989	1			91.4445	1			93.6223	1			67.8001	1			59.6217	1			87.2064	1			87.989	1			91.7993	1			92.0088	1			91.4445	1			86.7112	1			86.1176	1			86.1176
	72.9895	1			91.4447	1			93.6226	1			67.8005	1			59.622	1			87.2066	1			87.9895	1			91.7998	1			92.0089	1			91.4447	1			86.7116	1			86.1177	1			86.1177
	72.9895	0			91.4447	0			93.6226	0			67.8005	0			59.622	0			87.2066	0			87.9895	0			91.7998	0			92.0089	0			91.4447	0			86.7116	0			86.1177	0			86.1177
	72.99	0			91.445	0			93.623	0			67.801	0			59.6224	0			87.2067	0			87.99	0			91.8002	0			92.0089	0			91.445	0			86.712	0			86.1178	0			86.1178
	72.99	1			91.445	1			93.623	1			67.801	1			59.6224	1			87.2067	1			87.99	1			91.8002	1			92.0089	1			91.445	1			86.712	1			86.1178	1			86.1178
	72.9905	1			91.4453	1			93.6234	1			67.8014	1			59.6227	1			87.2069	1			87.9905	1			91.8006	1			92.009	1			91.4453	1			86.7124	1			86.1179	1			86.1179
	72.9905	0			91.4453	0			93.6234	0			67.8014	0			59.6227	0			87.2069	0			87.9905	0			91.8006	0			92.009	0			91.4453	0			86.7124	0			86.1179	0			86.1179
	72.991	0			91.4455	0			93.6237	0			67.8019	0			59.6231	0			87.207	0			87.991	0			91.8011	0			92.009	0			91.4455	0			86.7128	0			86.118	0			86.118
	72.991	1			91.4455	1			93.6237	1			67.8019	1			59.6231	1			87.207	1			87.991	1			91.8011	1			92.009	1			91.4455	1			86.7128	1			86.118	1			86.118
	72.9915	1			91.4458	1			93.624	1			67.8023	1			59.6234	1			87.2072	1			87.9915	1			91.8015	1			92.0091	1			91.4458	1			86.7132	1			86.1181	1			86.1181
	72.9915	0			91.4458	0			93.624	0			67.8023	0			59.6234	0			87.2072	0			87.9915	0			91.8015	0			92.0091	0			91.4458	0			86.7132	0			86.1181	0			86.1181
	72.992	0			91.446	0			93.6244	0			67.8028	0			59.6238	0			87.2073	0			87.992	0			91.802	0			92.0091	0			91.446	0			86.7136	0			86.1182	0			86.1182
	72.992	1			91.446	1			93.6244	1			67.8028	1			59.6238	1			87.2073	1			87.992	1			91.802	1			92.0091	1			91.446	1			86.7136	1			86.1182	1			86.1182
	72.9925	1			91.4463	1			93.6247	1			67.8032	1			59.6241	1			87.2075	1			87.9925	1			91.8024	1			92.0092	1			91.4463	1			86.714	1			86.1183	1			86.1183
	72.9925	0			91.4463	0			93.6247	0			67.8032	0			59.6241	0			87.2075	0			87.9925	0			91.8024	0			92.0092	0			91.4463	0			86.714	0			86.1183	0			86.1183
	72.993	0			91.4465	0			93.6251	0			67.8037	0			59.6245	0			87.2076	0			87.993	0			91.8029	0			92.0092	0			91.4465	0			86.7144	0			86.1184	0			86.1184
	72.993	1			91.4465	1			93.6251	1			67.8037	1			59.6245	1			87.2076	1			87.993	1			91.8029	1			92.0092	1			91.4465	1			86.7144	1			86.1184	1			86.1184
	72.9935	1			91.4468	1			93.6255	1			67.8041	1			59.6248	1			87.2078	1			87.9935	1			91.8033	1			92.0093	1			91.4468	1			86.7148	1			86.1185	1			86.1185
	72.9935	0			91.4468	0			93.6255	0			67.8041	0			59.6248	0			87.2078	0			87.9935	0			91.8033	0			92.0093	0			91.4468	0			86.7148	0			86.1185	0			86.1185
	72.994	0			91.447	0			93.6258	0			67.8046	0			59.6251	0			87.2079	0			87.994	0			91.8038	0			92.0093	0			91.447	0			86.7152	0			86.1186	0			86.1186
	72.994	1			91.447	1			93.6258	1			67.8046	1			59.6251	1			87.2079	1			87.994	1			91.8038	1			92.0093	1			91.447	1			86.7152	1			86.1186	1			86.1186
	72.9945	1			91.4472	1			93.6261	1			67.805	1			59.6255	1			87.2081	1			87.9945	1			91.8042	1			92.0094	1			91.4472	1			86.7156	1			86.1187	1			86.1187
	72.9945	0			91.4472	0			93.6261	0			67.805	0			59.6255	0			87.2081	0			87.9945	0			91.8042	0			92.0094	0			91.4472	0			86.7156	0			86.1187	0			86.1187
	72.995	0			91.4475	0			93.6265	0			67.8055	0			59.6258	0			87.2082	0			87.995	0			91.8047	0			92.0094	0			91.4475	0			86.716	0			86.1188	0			86.1188
	72.995	1			91.4475	1			93.6265	1			67.8055	1			59.6258	1			87.2082	1			87.995	1			91.8047	1			92.0094	1			91.4475	1			86.716	1			86.1188	1			86.1188
	72.9955	1			91.4477	1			93.6268	1			67.8059	1			59.6262	1			87.2084	1			87.9955	1			91.8051	1			92.0095	1			91.4477	1			86.7164	1			86.1189	1			86.1189
	72.9955	0			91.4477	0			93.6268	0			67.8059	0			59.6262	0			87.2084	0			87.9955	0			91.8051	0			92.0095	0			91.4477	0			86.7164	0			86.1189	0			86.1189
	72.996	0			91.448	0			93.6272	0			67.8064	0			59.6265	0			87.2085	0			87.996	0			91.8055	0			92.0095	0			91.448	0			86.7168	0			86.119	0			86.119
	72.996	1			91.448	1			93.6272	1			67.8064	1			59.6265	1			87.2085	1			87.996	1			91.8055	1			92.0095	1			91.448	1			86.7168	1			86.119	1			86.119
	72.9965	1			91.4483	1			93.6275	1			67.8068	1			59.6269	1			87.2087	1			87.9965	1			91.806	1			92.0096	1			91.4483	1			86.7172	1			86.1191	1			86.1191
	72.9965	0			91.4483	0			93.6275	0			67.8068	0			59.6269	0			87.2087	0			87.9965	0			91.806	0			92.0096	0			91.4483	0			86.7172	0			86.1191	0			86.1191
	72.997	0			91.4485	0			93.6279	0			67.8073	0			59.6272	0			87.2088	0			87.997	0			91.8064	0			92.0096	0			91.4485	0			86.7176	0			86.1192	0			86.1192
	72.997	1			91.4485	1			93.6279	1			67.8073	1			59.6272	1			87.2088	1			87.997	1			91.8064	1			92.0096	1			91.4485	1			86.7176	1			86.1192	1			86.1192
	72.9975	1			91.4488	1			93.6282	1			67.8077	1			59.6276	1			87.209	1			87.9975	1			91.8069	1			92.0097	1			91.4488	1			86.718	1			86.1193	1			86.1193
	72.9975	0			91.4488	0			93.6282	0			67.8077	0			59.6276	0			87.209	0			87.9975	0			91.8069	0			92.0097	0			91.4488	0			86.718	0			86.1193	0			86.1193
	72.998	0			91.449	0			93.6286	0			67.8082	0			59.6279	0			87.2091	0			87.998	0			91.8073	0			92.0097	0			91.449	0			86.7184	0			86.1194	0			86.1194
	72.998	1			91.449	1			93.6286	1			67.8082	1			59.6279	1			87.2091	1			87.998	1			91.8073	1			92.0097	1			91.449	1			86.7184	1			86.1194	1			86.1194
	72.9985	1			91.4493	1			93.6289	1			67.8086	1			59.6283	1			87.2093	1			87.9985	1			91.8078	1			92.0098	1			91.4493	1			86.7188	1			86.1195	1			86.1195
	72.9985	0			91.4493	0			93.6289	0			67.8086	0			59.6283	0			87.2093	0			87.9985	0			91.8078	0			92.0098	0			91.4493	0			86.7188	0			86.1195	0			86.1195
	72.999	0			91.4495	0			93.6293	0			67.8091	0			59.6286	0			87.2094	0			87.999	0			91.8082	0			92.0098	0			91.4495	0			86.7192	0			86.1196	0			86.1196
	72.999	1			91.4495	1			93.6293	1			67.8091	1			59.6286	1			87.2094	1			87.999	1			91.8082	1			92.0098	1			91.4495	1			86.7192	1			86.1196	1			86.1196
	72.9995	1			91.4498	1			93.6296	1			67.8095	1			59.629	1			87.2096	1			87.9995	1			91.8087	1			92.0099	1			91.4498	1			86.7196	1			86.1197	1			86.1197
	72.9995	0			91.4498	0			93.6296	0			67.8095	0			59.629	0			87.2096	0			87.9995	0			91.8087	0			92.0099	0			91.4498	0			86.7196	0			86.1197	0			86.1197
																	59.6293	0			87.2097	0							91.8091	0			92.0099	0											86.1198	0			86.1198
																	59.6293	1			87.2097	1							91.8091	1			92.0099	1											86.1198	1			86.1198
																	59.6297	1			87.2099	1							91.8096	1			92.01	1											86.1199	1			86.1199
																	59.6297	0			87.2099	0							91.8096	0			92.01	0											86.1199	0			86.1199
[truncated: 83 more columns]

## Sheet: Sheet14_HID
	96.72	0	96	0	91.28	0	91	0	84.72	0	84	0	78.72	0	78	0	88.48	0	88	0	87.72	0	87	0	87.28	0	87	0	92.72	0	92	0	90.4	0	90	0	87.48	0	87	0	85.18	0	85	0	79.64	0	79	0	79.72
	96.72	1	96	0	91.28	1	91	0	84.72	1	84	0	78.72	1	78	0	88.48	1	88	0	87.72	1	87	0	87.28	1	87	0	92.72	1	92	0	90.4	1	90	0	87.48	1	87	0	85.18	1	85	0	79.64	1	79	0	79.72
	96.7204	1	96.09	0	91.2802	1	91.04	0	84.7204	1	84.09	0	78.7204	1	78.09	0	88.4803	1	88.06	0	87.7204	1	87.09	0	87.2802	1	87.04	0	92.7204	1	92.09	0	90.4002	1	90.05	0	87.4803	1	87.06	0	85.1801	1	85.03	0	79.6404	1	79.08	0	79.7204
	96.7204	0	96.09	0	91.2802	0	91.04	0	84.7204	0	84.09	0	78.7204	0	78.09	0	88.4803	0	88.06	0	87.7204	0	87.09	0	87.2802	0	87.04	0	92.7204	0	92.09	0	90.4002	0	90.05	0	87.4803	0	87.06	0	85.1801	0	85.03	0	79.6404	0	79.08	0	79.7204
	96.7209	0	96.09	0	91.2804	0	91.04	0	84.7209	0	84.09	0	78.7209	0	78.09	0	88.4806	0	88.06	0	87.7209	0	87.09	0	87.2804	0	87.04	0	92.7209	0	92.09	0	90.4005	0	90.05	0	87.4806	0	87.06	0	85.1803	0	85.03	0	79.6408	0	79.08	0	79.7209
	96.7209	1	96.18	0	91.2804	1	91.08	0	84.7209	1	84.18	0	78.7209	1	78.18	0	88.4806	1	88.12	0	87.7209	1	87.18	0	87.2804	1	87.08	0	92.7209	1	92.18	0	90.4005	1	90.1	0	87.4806	1	87.12	0	85.1803	1	85.06	0	79.6408	1	79.16	0	79.7209
	96.7213	1	96.18	0	91.2806	1	91.08	0	84.7213	1	84.18	0	78.7213	1	78.18	0	88.4809	1	88.12	0	87.7213	1	87.18	0	87.2806	1	87.08	0	92.7213	1	92.18	0	90.4008	1	90.1	0	87.4809	1	87.12	0	85.1804	1	85.06	0	79.6412	1	79.16	0	79.7213
	96.7213	0	96.18	0	91.2806	0	91.08	0	84.7213	0	84.18	0	78.7213	0	78.18	0	88.4809	0	88.12	0	87.7213	0	87.18	0	87.2806	0	87.08	0	92.7213	0	92.18	0	90.4008	0	90.1	0	87.4809	0	87.12	0	85.1804	0	85.06	0	79.6412	0	79.16	0	79.7213
	96.7218	0	96.27	0	91.2808	0	91.12	0	84.7218	0	84.27	0	78.7218	0	78.27	0	88.4812	0	88.18	0	87.7218	0	87.27	0	87.2808	0	87.12	0	92.7218	0	92.27	0	90.401	0	90.15	0	87.4812	0	87.18	0	85.1806	0	85.09	0	79.6416	0	79.24	0	79.7218
	96.7218	1	96.27	0	91.2808	1	91.12	0	84.7218	1	84.27	0	78.7218	1	78.27	0	88.4812	1	88.18	0	87.7218	1	87.27	0	87.2808	1	87.12	0	92.7218	1	92.27	0	90.401	1	90.15	0	87.4812	1	87.18	0	85.1806	1	85.09	0	79.6416	1	79.24	0	79.7218
	96.7222	1	96.27	0	91.281	1	91.12	0	84.7222	1	84.27	0	78.7222	1	78.27	0	88.4815	1	88.18	0	87.7222	1	87.27	0	87.281	1	87.12	0	92.7222	1	92.27	0	90.4013	1	90.15	0	87.4815	1	87.18	0	85.1807	1	85.09	0	79.642	1	79.24	0	79.7222
	96.7222	0	96.36	0	91.281	0	91.16	0	84.7222	0	84.36	0	78.7222	0	78.36	0	88.4815	0	88.24	0	87.7222	0	87.36	0	87.281	0	87.16	0	92.7222	0	92.36	0	90.4013	0	90.2	0	87.4815	0	87.24	0	85.1807	0	85.12	0	79.642	0	79.32	0	79.7222
	96.7227	0	96.36	0	91.2812	0	91.16	0	84.7227	0	84.36	0	78.7227	0	78.36	0	88.4818	0	88.24	0	87.7227	0	87.36	0	87.2812	0	87.16	0	92.7227	0	92.36	0	90.4015	0	90.2	0	87.4818	0	87.24	0	85.1809	0	85.12	0	79.6424	0	79.32	0	79.7227
	96.7227	1	96.36	0	91.2812	1	91.16	0	84.7227	1	84.36	0	78.7227	1	78.36	0	88.4818	1	88.24	0	87.7227	1	87.36	0	87.2812	1	87.16	0	92.7227	1	92.36	0	90.4015	1	90.2	0	87.4818	1	87.24	0	85.1809	1	85.12	0	79.6424	1	79.32	0	79.7227
	96.7231	1	96.45	0	91.2814	1	91.2	0	84.7231	1	84.45	0	78.7231	1	78.45	0	88.4821	1	88.3	0	87.7231	1	87.45	0	87.2814	1	87.2	0	92.7231	1	92.45	0	90.4018	1	90.25	0	87.4821	1	87.3	0	85.181	1	85.15	0	79.6428	1	79.4	0	79.7231
	96.7231	0	96.45	0	91.2814	0	91.2	0	84.7231	0	84.45	0	78.7231	0	78.45	0	88.4821	0	88.3	0	87.7231	0	87.45	0	87.2814	0	87.2	0	92.7231	0	92.45	0	90.4018	0	90.25	0	87.4821	0	87.3	0	85.181	0	85.15	0	79.6428	0	79.4	0	79.7231
	96.7236	0	96.45	0	91.2816	0	91.2	0	84.7236	0	84.45	0	78.7236	0	78.45	0	88.4824	0	88.3	0	87.7236	0	87.45	0	87.2816	0	87.2	0	92.7236	0	92.45	0	90.402	0	90.25	0	87.4824	0	87.3	0	85.1812	0	85.15	0	79.6432	0	79.4	0	79.7236
	96.7236	1	96.54	0	91.2816	1	91.24	0	84.7236	1	84.54	0	78.7236	1	78.54	0	88.4824	1	88.36	0	87.7236	1	87.54	0	87.2816	1	87.24	0	92.7236	1	92.54	0	90.402	1	90.3	0	87.4824	1	87.36	0	85.1812	1	85.18	0	79.6432	1	79.48	0	79.7236
	96.724	1	96.54	0	91.2818	1	91.24	0	84.724	1	84.54	0	78.724	1	78.54	0	88.4827	1	88.36	0	87.724	1	87.54	0	87.2818	1	87.24	0	92.724	1	92.54	0	90.4023	1	90.3	0	87.4827	1	87.36	0	85.1813	1	85.18	0	79.6436	1	79.48	0	79.724
	96.724	0	96.54	0	91.2818	0	91.24	0	84.724	0	84.54	0	78.724	0	78.54	0	88.4827	0	88.36	0	87.724	0	87.54	0	87.2818	0	87.24	0	92.724	0	92.54	0	90.4023	0	90.3	0	87.4827	0	87.36	0	85.1813	0	85.18	1	79.6436	0	79.48	0	79.724
	96.7245	0	96.63	0	91.282	0	91.28	0	84.7245	0	84.63	0	78.7245	0	78.63	0	88.483	0	88.42	0	87.7245	0	87.63	0	87.282	0	87.28	0	92.7245	0	92.63	0	90.4025	0	90.35	0	87.483	0	87.42	0	85.1815	0	85.21	1	79.644	0	79.56	0	79.7245
	96.7245	1	96.63	0	91.282	1	91.28	0	84.7245	1	84.63	0	78.7245	1	78.63	0	88.483	1	88.42	0	87.7245	1	87.63	0	87.282	1	87.28	0	92.7245	1	92.63	0	90.4025	1	90.35	0	87.483	1	87.42	0	85.1815	1	85.21	0	79.644	1	79.56	0	79.7245
	96.7249	1	96.63	0	91.2822	1	91.28	1	84.7249	1	84.63	0	78.7249	1	78.63	0	88.4833	1	88.42	0	87.7249	1	87.63	0	87.2822	1	87.28	1	92.7249	1	92.63	0	90.4028	1	90.35	0	87.4833	1	87.42	0	85.1816	1	85.21	0	79.6444	1	79.56	0	79.7249
	96.7249	0	96.72	0	91.2822	0	91.32	1	84.7249	0	84.72	0	78.7249	0	78.72	0	88.4833	0	88.48	0	87.7249	0	87.72	0	87.2822	0	87.32	1	92.7249	0	92.72	0	90.4028	0	90.4	0	87.4833	0	87.48	0	85.1816	0	85.24	0	79.6444	0	79.64	0	79.7249
	96.7253	0	96.72	0	91.2824	0	91.32	0	84.7253	0	84.72	0	78.7253	0	78.72	0	88.4836	0	88.48	0	87.7253	0	87.72	0	87.2824	0	87.32	0	92.7253	0	92.72	0	90.403	0	90.4	0	87.4836	0	87.48	0	85.1818	0	85.24	0	79.6448	0	79.64	0	79.7253
	96.7253	1	96.72	1	91.2824	1	91.32	0	84.7253	1	84.72	1	78.7253	1	78.72	1	88.4836	1	88.48	1	87.7253	1	87.72	1	87.2824	1	87.32	0	92.7253	1	92.72	1	90.403	1	90.4	1	87.4836	1	87.48	1	85.1818	1	85.24	0	79.6448	1	79.64	1	79.7253
	96.7258	1	96.81	1	91.2826	1	91.36	0	84.7258	1	84.81	1	78.7258	1	78.81	1	88.4839	1	88.54	1	87.7258	1	87.81	1	87.2826	1	87.36	0	92.7258	1	92.81	1	90.4032	1	90.45	1	87.4839	1	87.54	1	85.1819	1	85.27	0	79.6452	1	79.72	1	79.7258
	96.7258	0	96.81	0	91.2826	0	91.36	0	84.7258	0	84.81	0	78.7258	0	78.81	0	88.4839	0	88.54	0	87.7258	0	87.81	0	87.2826	0	87.36	0	92.7258	0	92.81	0	90.4032	0	90.45	0	87.4839	0	87.54	0	85.1819	0	85.27	0	79.6452	0	79.72	0	79.7258
	96.7262	0	96.81	0	91.2828	0	91.36	0	84.7262	0	84.81	0	78.7262	0	78.81	0	88.4842	0	88.54	0	87.7262	0	87.81	0	87.2828	0	87.36	0	92.7262	0	92.81	0	90.4035	0	90.45	0	87.4842	0	87.54	0	85.1821	0	85.27	0	79.6456	0	79.72	0	79.7262
	96.7262	1	96.9	0	91.2828	1	91.4	0	84.7262	1	84.9	0	78.7262	1	78.9	0	88.4842	1	88.6	0	87.7262	1	87.9	0	87.2828	1	87.4	0	92.7262	1	92.9	0	90.4035	1	90.5	0	87.4842	1	87.6	0	85.1821	1	85.3	0	79.6456	1	79.8	0	79.7262
	96.7267	1	96.9	0	91.283	1	91.4	0	84.7267	1	84.9	0	78.7267	1	78.9	0	88.4845	1	88.6	0	87.7267	1	87.9	0	87.283	1	87.4	0	92.7267	1	92.9	0	90.4038	1	90.5	0	87.4845	1	87.6	0	85.1822	1	85.3	0	79.646	1	79.8	0	79.7267
	96.7267	0			91.283	0			84.7267	0			78.7267	0			88.4845	0			87.7267	0			87.283	0			92.7267	0			90.4038	0			87.4845	0			85.1822	0			79.646	0			79.7267
	96.7271	0			91.2832	0			84.7271	0			78.7271	0			88.4848	0			87.7271	0			87.2832	0			92.7271	0			90.404	0			87.4848	0			85.1824	0			79.6464	0			79.7271
	96.7271	1			91.2832	1			84.7271	1			78.7271	1			88.4848	1			87.7271	1			87.2832	1			92.7271	1			90.404	1			87.4848	1			85.1824	1			79.6464	1			79.7271
	96.7276	1			91.2834	1			84.7276	1			78.7276	1			88.485	1			87.7276	1			87.2834	1			92.7276	1			90.4043	1			87.485	1			85.1825	1			79.6468	1			79.7276
	96.7276	0			91.2834	0			84.7276	0			78.7276	0			88.485	0			87.7276	0			87.2834	0			92.7276	0			90.4043	0			87.485	0			85.1825	0			79.6468	0			79.7276
	96.728	0			91.2836	0			84.728	0			78.728	0			88.4853	0			87.728	0			87.2836	0			92.728	0			90.4045	0			87.4853	0			85.1827	0			79.6472	0			79.728
	96.728	1			91.2836	1			84.728	1			78.728	1			88.4853	1			87.728	1			87.2836	1			92.728	1			90.4045	1			87.4853	1			85.1827	1			79.6472	1			79.728
	96.7285	1			91.2838	1			84.7285	1			78.7285	1			88.4856	1			87.7285	1			87.2838	1			92.7285	1			90.4048	1			87.4856	1			85.1828	1			79.6476	1			79.7285
	96.7285	0			91.2838	0			84.7285	0			78.7285	0			88.4856	0			87.7285	0			87.2838	0			92.7285	0			90.4048	0			87.4856	0			85.1828	0			79.6476	0			79.7285
	96.7289	0			91.284	0			84.7289	0			78.7289	0			88.4859	0			87.7289	0			87.284	0			92.7289	0			90.405	0			87.4859	0			85.183	0			79.648	0			79.7289
	96.7289	1			91.284	1			84.7289	1			78.7289	1			88.4859	1			87.7289	1			87.284	1			92.7289	1			90.405	1			87.4859	1			85.183	1			79.648	1			79.7289
	96.7294	1			91.2842	1			84.7294	1			78.7294	1			88.4862	1			87.7294	1			87.2842	1			92.7294	1			90.4053	1			87.4862	1			85.1831	1			79.6484	1			79.7294
	96.7294	0			91.2842	0			84.7294	0			78.7294	0			88.4862	0			87.7294	0			87.2842	0			92.7294	0			90.4053	0			87.4862	0			85.1831	0			79.6484	0			79.7294
	96.7298	0			91.2844	0			84.7298	0			78.7298	0			88.4865	0			87.7298	0			87.2844	0			92.7298	0			90.4055	0			87.4865	0			85.1833	0			79.6488	0			79.7298
	96.7298	1			91.2844	1			84.7298	1			78.7298	1			88.4865	1			87.7298	1			87.2844	1			92.7298	1			90.4055	1			87.4865	1			85.1833	1			79.6488	1			79.7298
	96.7302	1			91.2846	1			84.7302	1			78.7302	1			88.4868	1			87.7302	1			87.2846	1			92.7302	1			90.4058	1			87.4868	1			85.1834	1			79.6492	1			79.7302
	96.7302	0			91.2846	0			84.7302	0			78.7302	0			88.4868	0			87.7302	0			87.2846	0			92.7302	0			90.4058	0			87.4868	0			85.1834	0			79.6492	0			79.7302
	96.7307	0			91.2848	0			84.7307	0			78.7307	0			88.4871	0			87.7307	0			87.2848	0			92.7307	0			90.406	0			87.4871	0			85.1836	0			79.6496	0			79.7307
	96.7307	1			91.2848	1			84.7307	1			78.7307	1			88.4871	1			87.7307	1			87.2848	1			92.7307	1			90.406	1			87.4871	1			85.1836	1			79.6496	1			79.7307
	96.7311	1			91.285	1			84.7311	1			78.7311	1			88.4874	1			87.7311	1			87.285	1			92.7311	1			90.4062	1			87.4874	1			85.1837	1			79.65	1			79.7311
	96.7311	0			91.285	0			84.7311	0			78.7311	0			88.4874	0			87.7311	0			87.285	0			92.7311	0			90.4062	0			87.4874	0			85.1837	0			79.65	0			79.7311
	96.7316	0			91.2851	0			84.7316	0			78.7316	0			88.4877	0			87.7316	0			87.2851	0			92.7316	0			90.4065	0			87.4877	0			85.1839	0			79.6504	0			79.7316
	96.7316	1			91.2851	1			84.7316	1			78.7316	1			88.4877	1			87.7316	1			87.2851	1			92.7316	1			90.4065	1			87.4877	1			85.1839	1			79.6504	1			79.7316
	96.732	1			91.2853	1			84.732	1			78.732	1			88.488	1			87.732	1			87.2853	1			92.732	1			90.4068	1			87.488	1			85.184	1			79.6508	1			79.732
	96.732	0			91.2853	0			84.732	0			78.732	0			88.488	0			87.732	0			87.2853	0			92.732	0			90.4068	0			87.488	0			85.184	0			79.6508	0			79.732
	96.7325	0			91.2855	0			84.7325	0			78.7325	0			88.4883	0			87.7325	0			87.2855	0			92.7325	0			90.407	0			87.4883	0			85.1842	0			79.6512	0			79.7325
	96.7325	1			91.2855	1			84.7325	1			78.7325	1			88.4883	1			87.7325	1			87.2855	1			92.7325	1			90.407	1			87.4883	1			85.1842	1			79.6512	1			79.7325
	96.7329	1			91.2857	1			84.7329	1			78.7329	1			88.4886	1			87.7329	1			87.2857	1			92.7329	1			90.4073	1			87.4886	1			85.1843	1			79.6516	1			79.7329
	96.7329	0			91.2857	0			84.7329	0			78.7329	0			88.4886	0			87.7329	0			87.2857	0			92.7329	0			90.4073	0			87.4886	0			85.1843	0			79.6516	0			79.7329
	96.7334	0			91.2859	0			84.7334	0			78.7334	0			88.4889	0			87.7334	0			87.2859	0			92.7334	0			90.4075	0			87.4889	0			85.1845	0			79.652	0			79.7334
	96.7334	1			91.2859	1			84.7334	1			78.7334	1			88.4889	1			87.7334	1			87.2859	1			92.7334	1			90.4075	1			87.4889	1			85.1845	1			79.652	1			79.7334
	96.7338	1			91.2861	1			84.7338	1			78.7338	1			88.4892	1			87.7338	1			87.2861	1			92.7338	1			90.4078	1			87.4892	1			85.1846	1			79.6524	1			79.7338
	96.7338	0			91.2861	0			84.7338	0			78.7338	0			88.4892	0			87.7338	0			87.2861	0			92.7338	0			90.4078	0			87.4892	0			85.1846	0			79.6524	0			79.7338
	96.7343	0			91.2863	0			84.7343	0			78.7343	0			88.4895	0			87.7343	0			87.2863	0			92.7343	0			90.408	0			87.4895	0			85.1848	0			79.6528	0			79.7343
	96.7343	1			91.2863	1			84.7343	1			78.7343	1			88.4895	1			87.7343	1			87.2863	1			92.7343	1			90.408	1			87.4895	1			85.1848	1			79.6528	1			79.7343
	96.7347	1			91.2865	1			84.7347	1			78.7347	1			88.4898	1			87.7347	1			87.2865	1			92.7347	1			90.4083	1			87.4898	1			85.1849	1			79.6532	1			79.7347
	96.7347	0			91.2865	0			84.7347	0			78.7347	0			88.4898	0			87.7347	0			87.2865	0			92.7347	0			90.4083	0			87.4898	0			85.1849	0			79.6532	0			79.7347
	96.7351	0			91.2867	0			84.7351	0			78.7351	0			88.4901	0			87.7351	0			87.2867	0			92.7351	0			90.4085	0			87.4901	0			85.185	0			79.6536	0			79.7351
	96.7351	1			91.2867	1			84.7351	1			78.7351	1			88.4901	1			87.7351	1			87.2867	1			92.7351	1			90.4085	1			87.4901	1			85.185	1			79.6536	1			79.7351
	96.7356	1			91.2869	1			84.7356	1			78.7356	1			88.4904	1			87.7356	1			87.2869	1			92.7356	1			90.4088	1			87.4904	1			85.1852	1			79.654	1			79.7356
	96.7356	0			91.2869	0			84.7356	0			78.7356	0			88.4904	0			87.7356	0			87.2869	0			92.7356	0			90.4088	0			87.4904	0			85.1852	0			79.654	0			79.7356
	96.736	0			91.2871	0			84.736	0			78.736	0			88.4907	0			87.736	0			87.2871	0			92.736	0			90.409	0			87.4907	0			85.1853	0			79.6544	0			79.736
	96.736	1			91.2871	1			84.736	1			78.736	1			88.4907	1			87.736	1			87.2871	1			92.736	1			90.409	1			87.4907	1			85.1853	1			79.6544	1			79.736
	96.7365	1			91.2873	1			84.7365	1			78.7365	1			88.491	1			87.7365	1			87.2873	1			92.7365	1			90.4093	1			87.491	1			85.1855	1			79.6548	1			79.7365
	96.7365	0			91.2873	0			84.7365	0			78.7365	0			88.491	0			87.7365	0			87.2873	0			92.7365	0			90.4093	0			87.491	0			85.1855	0			79.6548	0			79.7365
	96.7369	0			91.2875	0			84.7369	0			78.7369	0			88.4913	0			87.7369	0			87.2875	0			92.7369	0			90.4095	0			87.4913	0			85.1856	0			79.6552	0			79.7369
	96.7369	1			91.2875	1			84.7369	1			78.7369	1			88.4913	1			87.7369	1			87.2875	1			92.7369	1			90.4095	1			87.4913	1			85.1856	1			79.6552	1			79.7369
	96.7374	1			91.2877	1			84.7374	1			78.7374	1			88.4916	1			87.7374	1			87.2877	1			92.7374	1			90.4098	1			87.4916	1			85.1858	1			79.6556	1			79.7374
	96.7374	0			91.2877	0			84.7374	0			78.7374	0			88.4916	0			87.7374	0			87.2877	0			92.7374	0			90.4098	0			87.4916	0			85.1858	0			79.6556	0			79.7374
	96.7378	0			91.2879	0			84.7378	0			78.7378	0			88.4919	0			87.7378	0			87.2879	0			92.7378	0			90.41	0			87.4919	0			85.1859	0			79.656	0			79.7378
	96.7378	1			91.2879	1			84.7378	1			78.7378	1			88.4919	1			87.7378	1			87.2879	1			92.7378	1			90.41	1			87.4919	1			85.1859	1			79.656	1			79.7378
	96.7383	1			91.2881	1			84.7383	1			78.7383	1			88.4922	1			87.7383	1			87.2881	1			92.7383	1			90.4103	1			87.4922	1			85.1861	1			79.6564	1			79.7383
	96.7383	0			91.2881	0			84.7383	0			78.7383	0			88.4922	0			87.7383	0			87.2881	0			92.7383	0			90.4103	0			87.4922	0			85.1861	0			79.6564	0			79.7383
	96.7387	0			91.2883	0			84.7387	0			78.7387	0			88.4925	0			87.7387	0			87.2883	0			92.7387	0			90.4105	0			87.4925	0			85.1862	0			79.6568	0			79.7387
	96.7387	1			91.2883	1			84.7387	1			78.7387	1			88.4925	1			87.7387	1			87.2883	1			92.7387	1			90.4105	1			87.4925	1			85.1862	1			79.6568	1			79.7387
	96.7392	1			91.2885	1			84.7392	1			78.7392	1			88.4928	1			87.7392	1			87.2885	1			92.7392	1			90.4108	1			87.4928	1			85.1864	1			79.6572	1			79.7392
	96.7392	0			91.2885	0			84.7392	0			78.7392	0			88.4928	0			87.7392	0			87.2885	0			92.7392	0			90.4108	0			87.4928	0			85.1864	0			79.6572	0			79.7392
	96.7396	0			91.2887	0			84.7396	0			78.7396	0			88.4931	0			87.7396	0			87.2887	0			92.7396	0			90.411	0			87.4931	0			85.1865	0			79.6576	0			79.7396
	96.7396	1			91.2887	1			84.7396	1			78.7396	1			88.4931	1			87.7396	1			87.2887	1			92.7396	1			90.411	1			87.4931	1			85.1865	1			79.6576	1			79.7396
	96.74	1			91.2889	1			84.74	1			78.74	1			88.4934	1			87.74	1			87.2889	1			92.74	1			90.4113	1			87.4934	1			85.1867	1			79.658	1			79.74
	96.74	0			91.2889	0			84.74	0			78.74	0			88.4934	0			87.74	0			87.2889	0			92.74	0			90.4113	0			87.4934	0			85.1867	0			79.658	0			79.74
	96.7405	0			91.2891	0			84.7405	0			78.7405	0			88.4937	0			87.7405	0			87.2891	0			92.7405	0			90.4115	0			87.4937	0			85.1868	0			79.6584	0			79.7405
	96.7405	1			91.2891	1			84.7405	1			78.7405	1			88.4937	1			87.7405	1			87.2891	1			92.7405	1			90.4115	1			87.4937	1			85.1868	1			79.6584	1			79.7405
	96.7409	1			91.2893	1			84.7409	1			78.7409	1			88.494	1			87.7409	1			87.2893	1			92.7409	1			90.4118	1			87.494	1			85.187	1			79.6588	1			79.7409
	96.7409	0			91.2893	0			84.7409	0			78.7409	0			88.494	0			87.7409	0			87.2893	0			92.7409	0			90.4118	0			87.494	0			85.187	0			79.6588	0			79.7409
	96.7414	0			91.2895	0			84.7414	0			78.7414	0			88.4943	0			87.7414	0			87.2895	0			92.7414	0			90.412	0			87.4943	0			85.1871	0			79.6592	0			79.7414
	96.7414	1			91.2895	1			84.7414	1			78.7414	1			88.4943	1			87.7414	1			87.2895	1			92.7414	1			90.412	1			87.4943	1			85.1871	1			79.6592	1			79.7414
	96.7418	1			91.2897	1			84.7418	1			78.7418	1			88.4946	1			87.7418	1			87.2897	1			92.7418	1			90.4123	1			87.4946	1			85.1873	1			79.6596	1			79.7418
	96.7418	0			91.2897	0			84.7418	0			78.7418	0			88.4946	0			87.7418	0			87.2897	0			92.7418	0			90.4123	0			87.4946	0			85.1873	0			79.6596	0			79.7418
	96.7423	0			91.2899	0			84.7423	0			78.7423	0			88.4949	0			87.7423	0			87.2899	0			92.7423	0			90.4125	0			87.4949	0			85.1874	0			79.66	0			79.7423
	96.7423	1			91.2899	1			84.7423	1			78.7423	1			88.4949	1			87.7423	1			87.2899	1			92.7423	1			90.4125	1			87.4949	1			85.1874	1			79.66	1			79.7423
	96.7427	1			91.2901	1			84.7427	1			78.7427	1			88.4951	1			87.7427	1			87.2901	1			92.7427	1			90.4128	1			87.4951	1			85.1876	1			79.6604	1			79.7427
	96.7427	0			91.2901	0			84.7427	0			78.7427	0			88.4951	0			87.7427	0			87.2901	0			92.7427	0			90.4128	0			87.4951	0			85.1876	0			79.6604	0			79.7427
	96.7432	0			91.2903	0			84.7432	0			78.7432	0			88.4954	0			87.7432	0			87.2903	0			92.7432	0			90.413	0			87.4954	0			85.1877	0			79.6608	0			79.7432
	96.7432	1			91.2903	1			84.7432	1			78.7432	1			88.4954	1			87.7432	1			87.2903	1			92.7432	1			90.413	1			87.4954	1			85.1877	1			79.6608	1			79.7432
	96.7436	1			91.2905	1			84.7436	1			78.7436	1			88.4957	1			87.7436	1			87.2905	1			92.7436	1			90.4133	1			87.4957	1			85.1879	1			79.6612	1			79.7436
	96.7436	0			91.2905	0			84.7436	0			78.7436	0			88.4957	0			87.7436	0			87.2905	0			92.7436	0			90.4133	0			87.4957	0			85.1879	0			79.6612	0			79.7436
	96.7441	0			91.2907	0			84.7441	0			78.7441	0			88.496	0			87.7441	0			87.2907	0			92.7441	0			90.4135	0			87.496	0			85.188	0			79.6616	0			79.7441
	96.7441	1			91.2907	1			84.7441	1			78.7441	1			88.496	1			87.7441	1			87.2907	1			92.7441	1			90.4135	1			87.496	1			85.188	1			79.6616	1			79.7441
	96.7445	1			91.2909	1			84.7445	1			78.7445	1			88.4963	1			87.7445	1			87.2909	1			92.7445	1			90.4138	1			87.4963	1			85.1882	1			79.662	1			79.7445
	96.7445	0			91.2909	0			84.7445	0			78.7445	0			88.4963	0			87.7445	0			87.2909	0			92.7445	0			90.4138	0			87.4963	0			85.1882	0			79.662	0			79.7445
	96.745	0			91.2911	0			84.745	0			78.745	0			88.4966	0			87.745	0			87.2911	0			92.745	0			90.414	0			87.4966	0			85.1883	0			79.6624	0			79.745
	96.745	1			91.2911	1			84.745	1			78.745	1			88.4966	1			87.745	1			87.2911	1			92.745	1			90.414	1			87.4966	1			85.1883	1			79.6624	1			79.745
	96.7454	1			91.2913	1			84.7454	1			78.7454	1			88.4969	1			87.7454	1			87.2913	1			92.7454	1			90.4143	1			87.4969	1			85.1885	1			79.6628	1			79.7454
	96.7454	0			91.2913	0			84.7454	0			78.7454	0			88.4969	0			87.7454	0			87.2913	0			92.7454	0			90.4143	0			87.4969	0			85.1885	0			79.6628	0			79.7454
	96.7458	0			91.2915	0			84.7458	0			78.7458	0			88.4972	0			87.7458	0			87.2915	0			92.7458	0			90.4145	0			87.4972	0			85.1886	0			79.6632	0			79.7458
	96.7458	1			91.2915	1			84.7458	1			78.7458	1			88.4972	1			87.7458	1			87.2915	1			92.7458	1			90.4145	1			87.4972	1			85.1886	1			79.6632	1			79.7458
	96.7463	1			91.2917	1			84.7463	1			78.7463	1			88.4975	1			87.7463	1			87.2917	1			92.7463	1			90.4147	1			87.4975	1			85.1888	1			79.6636	1			79.7463
	96.7463	0			91.2917	0			84.7463	0			78.7463	0			88.4975	0			87.7463	0			87.2917	0			92.7463	0			90.4147	0			87.4975	0			85.1888	0			79.6636	0			79.7463
	96.7467	0			91.2919	0			84.7467	0			78.7467	0			88.4978	0			87.7467	0			87.2919	0			92.7467	0			90.415	0			87.4978	0			85.1889	0			79.664	0			79.7467
	96.7467	1			91.2919	1			84.7467	1			78.7467	1			88.4978	1			87.7467	1			87.2919	1			92.7467	1			90.415	1			87.4978	1			85.1889	1			79.664	1			79.7467
	96.7472	1			91.2921	1			84.7472	1			78.7472	1			88.4981	1			87.7472	1			87.2921	1			92.7472	1			90.4153	1			87.4981	1			85.1891	1			79.6644	1			79.7472
	96.7472	0			91.2921	0			84.7472	0			78.7472	0			88.4981	0			87.7472	0			87.2921	0			92.7472	0			90.4153	0			87.4981	0			85.1891	0			79.6644	0			79.7472
	96.7476	0			91.2923	0			84.7476	0			78.7476	0			88.4984	0			87.7476	0			87.2923	0			92.7476	0			90.4155	0			87.4984	0			85.1892	0			79.6648	0			79.7476
	96.7476	1			91.2923	1			84.7476	1			78.7476	1			88.4984	1			87.7476	1			87.2923	1			92.7476	1			90.4155	1			87.4984	1			85.1892	1			79.6648	1			79.7476
	96.7481	1			91.2925	1			84.7481	1			78.7481	1			88.4987	1			87.7481	1			87.2925	1			92.7481	1			90.4158	1			87.4987	1			85.1894	1			79.6652	1			79.7481
	96.7481	0			91.2925	0			84.7481	0			78.7481	0			88.4987	0			87.7481	0			87.2925	0			92.7481	0			90.4158	0			87.4987	0			85.1894	0			79.6652	0			79.7481
	96.7485	0			91.2927	0			84.7485	0			78.7485	0			88.499	0			87.7485	0			87.2927	0			92.7485	0			90.416	0			87.499	0			85.1895	0			79.6656	0			79.7485
	96.7485	1			91.2927	1			84.7485	1			78.7485	1			88.499	1			87.7485	1			87.2927	1			92.7485	1			90.416	1			87.499	1			85.1895	1			79.6656	1			79.7485
	96.749	1			91.2929	1			84.749	1			78.749	1			88.4993	1			87.749	1			87.2929	1			92.749	1			90.4163	1			87.4993	1			85.1897	1			79.666	1			79.749
	96.749	0			91.2929	0			84.749	0			78.749	0			88.4993	0			87.749	0			87.2929	0			92.749	0			90.4163	0			87.4993	0			85.1897	0			79.666	0			79.749
	96.7494	0			91.2931	0			84.7494	0			78.7494	0			88.4996	0			87.7494	0			87.2931	0			92.7494	0			90.4165	0			87.4996	0			85.1898	0			79.6664	0			79.7494
	96.7494	1			91.2931	1			84.7494	1			78.7494	1			88.4996	1			87.7494	1			87.2931	1			92.7494	1			90.4165	1			87.4996	1			85.1898	1			79.6664	1			79.7494
	96.7499	1			91.2933	1			84.7499	1			78.7499	1			88.4999	1			87.7499	1			87.2933	1			92.7499	1			90.4168	1			87.4999	1			85.19	1			79.6668	1			79.7499
	96.7499	0			91.2933	0			84.7499	0			78.7499	0			88.4999	0			87.7499	0			87.2933	0			92.7499	0			90.4168	0			87.4999	0			85.19	0			79.6668	0			79.7499
	96.7503	0			91.2935	0			84.7503	0			78.7503	0			88.5002	0			87.7503	0			87.2935	0			92.7503	0			90.417	0			87.5002	0			85.1901	0			79.6672	0			79.7503
	96.7503	1			91.2935	1			84.7503	1			78.7503	1			88.5002	1			87.7503	1			87.2935	1			92.7503	1			90.417	1			87.5002	1			85.1901	1			79.6672	1			79.7503
	96.7507	1			91.2937	1			84.7507	1			78.7507	1			88.5005	1			87.7507	1			87.2937	1			92.7507	1			90.4173	1			87.5005	1			85.1902	1			79.6676	1			79.7507
	96.7507	0			91.2937	0			84.7507	0			78.7507	0			88.5005	0			87.7507	0			87.2937	0			92.7507	0			90.4173	0			87.5005	0			85.1902	0			79.6676	0			79.7507
	96.7512	0			91.2939	0			84.7512	0			78.7512	0			88.5008	0			87.7512	0			87.2939	0			92.7512	0			90.4175	0			87.5008	0			85.1904	0			79.668	0			79.7512
	96.7512	1			91.2939	1			84.7512	1			78.7512	1			88.5008	1			87.7512	1			87.2939	1			92.7512	1			90.4175	1			87.5008	1			85.1904	1			79.668	1			79.7512
	96.7516	1			91.2941	1			84.7516	1			78.7516	1			88.5011	1			87.7516	1			87.2941	1			92.7516	1			90.4177	1			87.5011	1			85.1905	1			79.6684	1			79.7516
	96.7516	0			91.2941	0			84.7516	0			78.7516	0			88.5011	0			87.7516	0			87.2941	0			92.7516	0			90.4177	0			87.5011	0			85.1905	0			79.6684	0			79.7516
	96.7521	0			91.2943	0			84.7521	0			78.7521	0			88.5014	0			87.7521	0			87.2943	0			92.7521	0			90.418	0			87.5014	0			85.1907	0			79.6688	0			79.7521
	96.7521	1			91.2943	1			84.7521	1			78.7521	1			88.5014	1			87.7521	1			87.2943	1			92.7521	1			90.418	1			87.5014	1			85.1907	1			79.6688	1			79.7521
	96.7525	1			91.2945	1			84.7525	1			78.7525	1			88.5017	1			87.7525	1			87.2945	1			92.7525	1			90.4183	1			87.5017	1			85.1908	1			79.6692	1			79.7525
	96.7525	0			91.2945	0			84.7525	0			78.7525	0			88.5017	0			87.7525	0			87.2945	0			92.7525	0			90.4183	0			87.5017	0			85.1908	0			79.6692	0			79.7525
	96.753	0			91.2947	0			84.753	0			78.753	0			88.502	0			87.753	0			87.2947	0			92.753	0			90.4185	0			87.502	0			85.191	0			79.6696	0			79.753
	96.753	1			91.2947	1			84.753	1			78.753	1			88.502	1			87.753	1			87.2947	1			92.753	1			90.4185	1			87.502	1			85.191	1			79.6696	1			79.753
	96.7534	1			91.2949	1			84.7534	1			78.7534	1			88.5023	1			87.7534	1			87.2949	1			92.7534	1			90.4188	1			87.5023	1			85.1911	1			79.67	1			79.7534
	96.7534	0			91.2949	0			84.7534	0			78.7534	0			88.5023	0			87.7534	0			87.2949	0			92.7534	0			90.4188	0			87.5023	0			85.1911	0			79.67	0			79.7534
	96.7539	0			91.295	0			84.7539	0			78.7539	0			88.5026	0			87.7539	0			87.295	0			92.7539	0			90.419	0			87.5026	0			85.1913	0			79.6704	0			79.7539
	96.7539	1			91.295	1			84.7539	1			78.7539	1			88.5026	1			87.7539	1			87.295	1			92.7539	1			90.419	1			87.5026	1			85.1913	1			79.6704	1			79.7539
	96.7543	1			91.2952	1			84.7543	1			78.7543	1			88.5029	1			87.7543	1			87.2952	1			92.7543	1			90.4193	1			87.5029	1			85.1914	1			79.6708	1			79.7543
	96.7543	0			91.2952	0			84.7543	0			78.7543	0			88.5029	0			87.7543	0			87.2952	0			92.7543	0			90.4193	0			87.5029	0			85.1914	0			79.6708	0			79.7543
	96.7548	0			91.2954	0			84.7548	0			78.7548	0			88.5032	0			87.7548	0			87.2954	0			92.7548	0			90.4195	0			87.5032	0			85.1916	0			79.6712	0			79.7548
	96.7548	1			91.2954	1			84.7548	1			78.7548	1			88.5032	1			87.7548	1			87.2954	1			92.7548	1			90.4195	1			87.5032	1			85.1916	1			79.6712	1			79.7548
	96.7552	1			91.2956	1			84.7552	1			78.7552	1			88.5035	1			87.7552	1			87.2956	1			92.7552	1			90.4198	1			87.5035	1			85.1917	1			79.6716	1			79.7552
	96.7552	0			91.2956	0			84.7552	0			78.7552	0			88.5035	0			87.7552	0			87.2956	0			92.7552	0			90.4198	0			87.5035	0			85.1917	0			79.6716	0			79.7552
	96.7556	0			91.2958	0			84.7556	0			78.7556	0			88.5038	0			87.7556	0			87.2958	0			92.7556	0			90.42	0			87.5038	0			85.1919	0			79.672	0			79.7556
	96.7556	1			91.2958	1			84.7556	1			78.7556	1			88.5038	1			87.7556	1			87.2958	1			92.7556	1			90.42	1			87.5038	1			85.1919	1			79.672	1			79.7556
	96.7561	1			91.296	1			84.7561	1			78.7561	1			88.5041	1			87.7561	1			87.296	1			92.7561	1			90.4203	1			87.5041	1			85.192	1			79.6724	1			79.7561
	96.7561	0			91.296	0			84.7561	0			78.7561	0			88.5041	0			87.7561	0			87.296	0			92.7561	0			90.4203	0			87.5041	0			85.192	0			79.6724	0			79.7561
	96.7565	0			91.2962	0			84.7565	0			78.7565	0			88.5044	0			87.7565	0			87.2962	0			92.7565	0			90.4205	0			87.5044	0			85.1922	0			79.6728	0			79.7565
	96.7565	1			91.2962	1			84.7565	1			78.7565	1			88.5044	1			87.7565	1			87.2962	1			92.7565	1			90.4205	1			87.5044	1			85.1922	1			79.6728	1			79.7565
	96.757	1			91.2964	1			84.757	1			78.757	1			88.5047	1			87.757	1			87.2964	1			92.757	1			90.4207	1			87.5047	1			85.1923	1			79.6732	1			79.757
	96.757	0			91.2964	0			84.757	0			78.757	0			88.5047	0			87.757	0			87.2964	0			92.757	0			90.4207	0			87.5047	0			85.1923	0			79.6732	0			79.757
	96.7574	0			91.2966	0			84.7574	0			78.7574	0			88.505	0			87.7574	0			87.2966	0			92.7574	0			90.421	0			87.505	0			85.1925	0			79.6736	0			79.7574
	96.7574	1			91.2966	1			84.7574	1			78.7574	1			88.505	1			87.7574	1			87.2966	1			92.7574	1			90.421	1			87.505	1			85.1925	1			79.6736	1			79.7574
	96.7579	1			91.2968	1			84.7579	1			78.7579	1			88.5052	1			87.7579	1			87.2968	1			92.7579	1			90.4213	1			87.5052	1			85.1926	1			79.674	1			79.7579
	96.7579	0			91.2968	0			84.7579	0			78.7579	0			88.5052	0			87.7579	0			87.2968	0			92.7579	0			90.4213	0			87.5052	0			85.1926	0			79.674	0			79.7579
	96.7583	0			91.297	0			84.7583	0			78.7583	0			88.5055	0			87.7583	0			87.297	0			92.7583	0			90.4215	0			87.5055	0			85.1928	0			79.6744	0			79.7583
	96.7583	1			91.297	1			84.7583	1			78.7583	1			88.5055	1			87.7583	1			87.297	1			92.7583	1			90.4215	1			87.5055	1			85.1928	1			79.6744	1			79.7583
	96.7588	1			91.2972	1			84.7588	1			78.7588	1			88.5058	1			87.7588	1			87.2972	1			92.7588	1			90.4218	1			87.5058	1			85.1929	1			79.6748	1			79.7588
	96.7588	0			91.2972	0			84.7588	0			78.7588	0			88.5058	0			87.7588	0			87.2972	0			92.7588	0			90.4218	0			87.5058	0			85.1929	0			79.6748	0			79.7588
	96.7592	0			91.2974	0			84.7592	0			78.7592	0			88.5061	0			87.7592	0			87.2974	0			92.7592	0			90.422	0			87.5061	0			85.1931	0			79.6752	0			79.7592
	96.7592	1			91.2974	1			84.7592	1			78.7592	1			88.5061	1			87.7592	1			87.2974	1			92.7592	1			90.422	1			87.5061	1			85.1931	1			79.6752	1			79.7592
	96.7597	1			91.2976	1			84.7597	1			78.7597	1			88.5064	1			87.7597	1			87.2976	1			92.7597	1			90.4223	1			87.5064	1			85.1932	1			79.6756	1			79.7597
	96.7597	0			91.2976	0			84.7597	0			78.7597	0			88.5064	0			87.7597	0			87.2976	0			92.7597	0			90.4223	0			87.5064	0			85.1932	0			79.6756	0			79.7597
	96.7601	0			91.2978	0			84.7601	0			78.7601	0			88.5067	0			87.7601	0			87.2978	0			92.7601	0			90.4225	0			87.5067	0			85.1934	0			79.676	0			79.7601
	96.7601	1			91.2978	1			84.7601	1			78.7601	1			88.5067	1			87.7601	1			87.2978	1			92.7601	1			90.4225	1			87.5067	1			85.1934	1			79.676	1			79.7601
	96.7605	1			91.298	1			84.7605	1			78.7605	1			88.507	1			87.7605	1			87.298	1			92.7605	1			90.4228	1			87.507	1			85.1935	1			79.6764	1			79.7605
	96.7605	0			91.298	0			84.7605	0			78.7605	0			88.507	0			87.7605	0			87.298	0			92.7605	0			90.4228	0			87.507	0			85.1935	0			79.6764	0			79.7605
	96.761	0			91.2982	0			84.761	0			78.761	0			88.5073	0			87.761	0			87.2982	0			92.761	0			90.423	0			87.5073	0			85.1937	0			79.6768	0			79.761
	96.761	1			91.2982	1			84.761	1			78.761	1			88.5073	1			87.761	1			87.2982	1			92.761	1			90.423	1			87.5073	1			85.1937	1			79.6768	1			79.761
	96.7614	1			91.2984	1			84.7614	1			78.7614	1			88.5076	1			87.7614	1			87.2984	1			92.7614	1			90.4233	1			87.5076	1			85.1938	1			79.6772	1			79.7614
	96.7614	0			91.2984	0			84.7614	0			78.7614	0			88.5076	0			87.7614	0			87.2984	0			92.7614	0			90.4233	0			87.5076	0			85.1938	0			79.6772	0			79.7614
	96.7619	0			91.2986	0			84.7619	0			78.7619	0			88.5079	0			87.7619	0			87.2986	0			92.7619	0			90.4235	0			87.5079	0			85.194	0			79.6776	0			79.7619
	96.7619	1			91.2986	1			84.7619	1			78.7619	1			88.5079	1			87.7619	1			87.2986	1			92.7619	1			90.4235	1			87.5079	1			85.194	1			79.6776	1			79.7619
	96.7623	1			91.2988	1			84.7623	1			78.7623	1			88.5082	1			87.7623	1			87.2988	1			92.7623	1			90.4237	1			87.5082	1			85.1941	1			79.678	1			79.7623
	96.7623	0			91.2988	0			84.7623	0			78.7623	0			88.5082	0			87.7623	0			87.2988	0			92.7623	0			90.4237	0			87.5082	0			85.1941	0			79.678	0			79.7623
	96.7628	0			91.299	0			84.7628	0			78.7628	0			88.5085	0			87.7628	0			87.299	0			92.7628	0			90.424	0			87.5085	0			85.1943	0			79.6784	0			79.7628
	96.7628	1			91.299	1			84.7628	1			78.7628	1			88.5085	1			87.7628	1			87.299	1			92.7628	1			90.424	1			87.5085	1			85.1943	1			79.6784	1			79.7628
	96.7632	1			91.2992	1			84.7632	1			78.7632	1			88.5088	1			87.7632	1			87.2992	1			92.7632	1			90.4243	1			87.5088	1			85.1944	1			79.6788	1			79.7632
	96.7632	0			91.2992	0			84.7632	0			78.7632	0			88.5088	0			87.7632	0			87.2992	0			92.7632	0			90.4243	0			87.5088	0			85.1944	0			79.6788	0			79.7632
	96.7637	0			91.2994	0			84.7637	0			78.7637	0			88.5091	0			87.7637	0			87.2994	0			92.7637	0			90.4245	0			87.5091	0			85.1946	0			79.6792	0			79.7637
	96.7637	1			91.2994	1			84.7637	1			78.7637	1			88.5091	1			87.7637	1			87.2994	1			92.7637	1			90.4245	1			87.5091	1			85.1946	1			79.6792	1			79.7637
	96.7641	1			91.2996	1			84.7641	1			78.7641	1			88.5094	1			87.7641	1			87.2996	1			92.7641	1			90.4248	1			87.5094	1			85.1947	1			79.6796	1			79.7641
	96.7641	0			91.2996	0			84.7641	0			78.7641	0			88.5094	0			87.7641	0			87.2996	0			92.7641	0			90.4248	0			87.5094	0			85.1947	0			79.6796	0			79.7641
	96.7646	0			91.2998	0			84.7646	0			78.7646	0			88.5097	0			87.7646	0			87.2998	0			92.7646	0			90.425	0			87.5097	0			85.1949	0			79.68	0			79.7646
	96.7646	1			91.2998	1			84.7646	1			78.7646	1			88.5097	1			87.7646	1			87.2998	1			92.7646	1			90.425	1			87.5097	1			85.1949	1			79.68	1			79.7646
	96.765	1			91.3	1			84.765	1			78.765	1			88.51	1			87.765	1			87.3	1			92.765	1			90.4253	1			87.51	1			85.195	1			79.6804	1			79.765
	96.765	0			91.3	0			84.765	0			78.765	0			88.51	0			87.765	0			87.3	0			92.765	0			90.4253	0			87.51	0			85.195	0			79.6804	0			79.765
	96.7654	0			91.3002	0			84.7654	0			78.7654	0			88.5103	0			87.7654	0			87.3002	0			92.7654	0			90.4255	0			87.5103	0			85.1951	0			79.6808	0			79.7654
	96.7654	1			91.3002	1			84.7654	1			78.7654	1			88.5103	1			87.7654	1			87.3002	1			92.7654	1			90.4255	1			87.5103	1			85.1951	1			79.6808	1			79.7654
	96.7659	1			91.3004	1			84.7659	1			78.7659	1			88.5106	1			87.7659	1			87.3004	1			92.7659	1			90.4258	1			87.5106	1			85.1953	1			79.6812	1			79.7659
	96.7659	0			91.3004	0			84.7659	0			78.7659	0			88.5106	0			87.7659	0			87.3004	0			92.7659	0			90.4258	0			87.5106	0			85.1953	0			79.6812	0			79.7659
	96.7663	0			91.3006	0			84.7663	0			78.7663	0			88.5109	0			87.7663	0			87.3006	0			92.7663	0			90.426	0			87.5109	0			85.1954	0			79.6816	0			79.7663
	96.7663	1			91.3006	1			84.7663	1			78.7663	1			88.5109	1			87.7663	1			87.3006	1			92.7663	1			90.426	1			87.5109	1			85.1954	1			79.6816	1			79.7663
	96.7668	1			91.3008	1			84.7668	1			78.7668	1			88.5112	1			87.7668	1			87.3008	1			92.7668	1			90.4263	1			87.5112	1			85.1956	1			79.682	1			79.7668
	96.7668	0			91.3008	0			84.7668	0			78.7668	0			88.5112	0			87.7668	0			87.3008	0			92.7668	0			90.4263	0			87.5112	0			85.1956	0			79.682	0			79.7668
	96.7672	0			91.301	0			84.7672	0			78.7672	0			88.5115	0			87.7672	0			87.301	0			92.7672	0			90.4265	0			87.5115	0			85.1957	0			79.6824	0			79.7672
	96.7672	1			91.301	1			84.7672	1			78.7672	1			88.5115	1			87.7672	1			87.301	1			92.7672	1			90.4265	1			87.5115	1			85.1957	1			79.6824	1			79.7672
	96.7677	1			91.3012	1			84.7677	1			78.7677	1			88.5118	1			87.7677	1			87.3012	1			92.7677	1			90.4267	1			87.5118	1			85.1959	1			79.6828	1			79.7677
	96.7677	0			91.3012	0			84.7677	0			78.7677	0			88.5118	0			87.7677	0			87.3012	0			92.7677	0			90.4267	0			87.5118	0			85.1959	0			79.6828	0			79.7677
	96.7681	0			91.3014	0			84.7681	0			78.7681	0			88.5121	0			87.7681	0			87.3014	0			92.7681	0			90.427	0			87.5121	0			85.196	0			79.6832	0			79.7681
	96.7681	1			91.3014	1			84.7681	1			78.7681	1			88.5121	1			87.7681	1			87.3014	1			92.7681	1			90.427	1			87.5121	1			85.196	1			79.6832	1			79.7681
	96.7686	1			91.3016	1			84.7686	1			78.7686	1			88.5124	1			87.7686	1			87.3016	1			92.7686	1			90.4273	1			87.5124	1			85.1962	1			79.6836	1			79.7686
	96.7686	0			91.3016	0			84.7686	0			78.7686	0			88.5124	0			87.7686	0			87.3016	0			92.7686	0			90.4273	0			87.5124	0			85.1962	0			79.6836	0			79.7686
	96.769	0			91.3018	0			84.769	0			78.769	0			88.5127	0			87.769	0			87.3018	0			92.769	0			90.4275	0			87.5127	0			85.1963	0			79.684	0			79.769
	96.769	1			91.3018	1			84.769	1			78.769	1			88.5127	1			87.769	1			87.3018	1			92.769	1			90.4275	1			87.5127	1			85.1963	1			79.684	1			79.769
	96.7695	1			91.302	1			84.7695	1			78.7695	1			88.513	1			87.7695	1			87.302	1			92.7695	1			90.4278	1			87.513	1			85.1965	1			79.6844	1			79.7695
	96.7695	0			91.302	0			84.7695	0			78.7695	0			88.513	0			87.7695	0			87.302	0			92.7695	0			90.4278	0			87.513	0			85.1965	0			79.6844	0			79.7695
	96.7699	0			91.3022	0			84.7699	0			78.7699	0			88.5133	0			87.7699	0			87.3022	0			92.7699	0			90.428	0			87.5133	0			85.1966	0			79.6848	0			79.7699
	96.7699	1			91.3022	1			84.7699	1			78.7699	1			88.5133	1			87.7699	1			87.3022	1			92.7699	1			90.428	1			87.5133	1			85.1966	1			79.6848	1			79.7699
	96.7703	1			91.3024	1			84.7703	1			78.7703	1			88.5136	1			87.7703	1			87.3024	1			92.7703	1			90.4283	1			87.5136	1			85.1968	1			79.6852	1			79.7703
	96.7703	0			91.3024	0			84.7703	0			78.7703	0			88.5136	0			87.7703	0			87.3024	0			92.7703	0			90.4283	0			87.5136	0			85.1968	0			79.6852	0			79.7703
	96.7708	0			91.3026	0			84.7708	0			78.7708	0			88.5139	0			87.7708	0			87.3026	0			92.7708	0			90.4285	0			87.5139	0			85.1969	0			79.6856	0			79.7708
	96.7708	1			91.3026	1			84.7708	1			78.7708	1			88.5139	1			87.7708	1			87.3026	1			92.7708	1			90.4285	1			87.5139	1			85.1969	1			79.6856	1			79.7708
	96.7712	1			91.3028	1			84.7712	1			78.7712	1			88.5142	1			87.7712	1			87.3028	1			92.7712	1			90.4288	1			87.5142	1			85.1971	1			79.686	1			79.7712
	96.7712	0			91.3028	0			84.7712	0			78.7712	0			88.5142	0			87.7712	0			87.3028	0			92.7712	0			90.4288	0			87.5142	0			85.1971	0			79.686	0			79.7712
	96.7717	0			91.303	0			84.7717	0			78.7717	0			88.5145	0			87.7717	0			87.303	0			92.7717	0			90.429	0			87.5145	0			85.1972	0			79.6864	0			79.7717
	96.7717	1			91.303	1			84.7717	1			78.7717	1			88.5145	1			87.7717	1			87.303	1			92.7717	1			90.429	1			87.5145	1			85.1972	1			79.6864	1			79.7717
	96.7721	1			91.3032	1			84.7721	1			78.7721	1			88.5148	1			87.7721	1			87.3032	1			92.7721	1			90.4293	1			87.5148	1			85.1974	1			79.6868	1			79.7721
	96.7721	0			91.3032	0			84.7721	0			78.7721	0			88.5148	0			87.7721	0			87.3032	0			92.7721	0			90.4293	0			87.5148	0			85.1974	0			79.6868	0			79.7721
	96.7726	0			91.3034	0			84.7726	0			78.7726	0			88.515	0			87.7726	0			87.3034	0			92.7726	0			90.4295	0			87.515	0			85.1975	0			79.6872	0			79.7726
	96.7726	1			91.3034	1			84.7726	1			78.7726	1			88.515	1			87.7726	1			87.3034	1			92.7726	1			90.4295	1			87.515	1			85.1975	1			79.6872	1			79.7726
	96.773	1			91.3036	1			84.773	1			78.773	1			88.5153	1			87.773	1			87.3036	1			92.773	1			90.4297	1			87.5153	1			85.1977	1			79.6876	1			79.773
	96.773	0			91.3036	0			84.773	0			78.773	0			88.5153	0			87.773	0			87.3036	0			92.773	0			90.4297	0			87.5153	0			85.1977	0			79.6876	0			79.773
	96.7735	0			91.3038	0			84.7735	0			78.7735	0			88.5156	0			87.7735	0			87.3038	0			92.7735	0			90.43	0			87.5156	0			85.1978	0			79.688	0			79.7735
	96.7735	1			91.3038	1			84.7735	1			78.7735	1			88.5156	1			87.7735	1			87.3038	1			92.7735	1			90.43	1			87.5156	1			85.1978	1			79.688	1			79.7735
	96.7739	1			91.304	1			84.7739	1			78.7739	1			88.5159	1			87.7739	1			87.304	1			92.7739	1			90.4303	1			87.5159	1			85.198	1			79.6884	1			79.7739
	96.7739	0			91.304	0			84.7739	0			78.7739	0			88.5159	0			87.7739	0			87.304	0			92.7739	0			90.4303	0			87.5159	0			85.198	0			79.6884	0			79.7739
	96.7744	0			91.3042	0			84.7744	0			78.7744	0			88.5162	0			87.7744	0			87.3042	0			92.7744	0			90.4305	0			87.5162	0			85.1981	0			79.6888	0			79.7744
	96.7744	1			91.3042	1			84.7744	1			78.7744	1			88.5162	1			87.7744	1			87.3042	1			92.7744	1			90.4305	1			87.5162	1			85.1981	1			79.6888	1			79.7744
	96.7748	1			91.3044	1			84.7748	1			78.7748	1			88.5165	1			87.7748	1			87.3044	1			92.7748	1			90.4308	1			87.5165	1			85.1983	1			79.6892	1			79.7748
	96.7748	0			91.3044	0			84.7748	0			78.7748	0			88.5165	0			87.7748	0			87.3044	0			92.7748	0			90.4308	0			87.5165	0			85.1983	0			79.6892	0			79.7748
	96.7752	0			91.3046	0			84.7752	0			78.7752	0			88.5168	0			87.7752	0			87.3046	0			92.7752	0			90.431	0			87.5168	0			85.1984	0			79.6896	0			79.7752
	96.7752	1			91.3046	1			84.7752	1			78.7752	1			88.5168	1			87.7752	1			87.3046	1			92.7752	1			90.431	1			87.5168	1			85.1984	1			79.6896	1			79.7752
	96.7757	1			91.3048	1			84.7757	1			78.7757	1			88.5171	1			87.7757	1			87.3048	1			92.7757	1			90.4313	1			87.5171	1			85.1986	1			79.69	1			79.7757
	96.7757	0			91.3048	0			84.7757	0			78.7757	0			88.5171	0			87.7757	0			87.3048	0			92.7757	0			90.4313	0			87.5171	0			85.1986	0			79.69	0			79.7757
	96.7761	0			91.305	0			84.7761	0			78.7761	0			88.5174	0			87.7761	0			87.305	0			92.7761	0			90.4315	0			87.5174	0			85.1987	0			79.6904	0			79.7761
	96.7761	1			91.305	1			84.7761	1			78.7761	1			88.5174	1			87.7761	1			87.305	1			92.7761	1			90.4315	1			87.5174	1			85.1987	1			79.6904	1			79.7761
	96.7766	1			91.3051	1			84.7766	1			78.7766	1			88.5177	1			87.7766	1			87.3051	1			92.7766	1			90.4318	1			87.5177	1			85.1989	1			79.6908	1			79.7766
	96.7766	0			91.3051	0			84.7766	0			78.7766	0			88.5177	0			87.7766	0			87.3051	0			92.7766	0			90.4318	0			87.5177	0			85.1989	0			79.6908	0			79.7766
	96.777	0			91.3053	0			84.777	0			78.777	0			88.518	0			87.777	0			87.3053	0			92.777	0			90.432	0			87.518	0			85.199	0			79.6912	0			79.777
	96.777	1			91.3053	1			84.777	1			78.777	1			88.518	1			87.777	1			87.3053	1			92.777	1			90.432	1			87.518	1			85.199	1			79.6912	1			79.777
	96.7775	1			91.3055	1			84.7775	1			78.7775	1			88.5183	1			87.7775	1			87.3055	1			92.7775	1			90.4323	1			87.5183	1			85.1992	1			79.6916	1			79.7775
	96.7775	0			91.3055	0			84.7775	0			78.7775	0			88.5183	0			87.7775	0			87.3055	0			92.7775	0			90.4323	0			87.5183	0			85.1992	0			79.6916	0			79.7775
	96.7779	0			91.3057	0			84.7779	0			78.7779	0			88.5186	0			87.7779	0			87.3057	0			92.7779	0			90.4325	0			87.5186	0			85.1993	0			79.692	0			79.7779
	96.7779	1			91.3057	1			84.7779	1			78.7779	1			88.5186	1			87.7779	1			87.3057	1			92.7779	1			90.4325	1			87.5186	1			85.1993	1			79.692	1			79.7779
	96.7784	1			91.3059	1			84.7784	1			78.7784	1			88.5189	1			87.7784	1			87.3059	1			92.7784	1			90.4327	1			87.5189	1			85.1995	1			79.6924	1			79.7784
	96.7784	0			91.3059	0			84.7784	0			78.7784	0			88.5189	0			87.7784	0			87.3059	0			92.7784	0			90.4327	0			87.5189	0			85.1995	0			79.6924	0			79.7784
	96.7788	0			91.3061	0			84.7788	0			78.7788	0			88.5192	0			87.7788	0			87.3061	0			92.7788	0			90.433	0			87.5192	0			85.1996	0			79.6928	0			79.7788
	96.7788	1			91.3061	1			84.7788	1			78.7788	1			88.5192	1			87.7788	1			87.3061	1			92.7788	1			90.433	1			87.5192	1			85.1996	1			79.6928	1			79.7788
	96.7793	1			91.3063	1			84.7793	1			78.7793	1			88.5195	1			87.7793	1			87.3063	1			92.7793	1			90.4333	1			87.5195	1			85.1998	1			79.6932	1			79.7793
	96.7793	0			91.3063	0			84.7793	0			78.7793	0			88.5195	0			87.7793	0			87.3063	0			92.7793	0			90.4333	0			87.5195	0			85.1998	0			79.6932	0			79.7793
	96.7797	0			91.3065	0			84.7797	0			78.7797	0			88.5198	0			87.7797	0			87.3065	0			92.7797	0			90.4335	0			87.5198	0			85.1999	0			79.6936	0			79.7797
	96.7797	1			91.3065	1			84.7797	1			78.7797	1			88.5198	1			87.7797	1			87.3065	1			92.7797	1			90.4335	1			87.5198	1			85.1999	1			79.6936	1			79.7797
	96.7801	1			91.3067	1			84.7801	1			78.7801	1			88.5201	1			87.7801	1			87.3067	1			92.7801	1			90.4338	1			87.5201	1			85.2	1			79.694	1			79.7801
	96.7801	0			91.3067	0			84.7801	0			78.7801	0			88.5201	0			87.7801	0			87.3067	0			92.7801	0			90.4338	0			87.5201	0			85.2	0			79.694	0			79.7801
	96.7806	0			91.3069	0			84.7806	0			78.7806	0			88.5204	0			87.7806	0			87.3069	0			92.7806	0			90.434	0			87.5204	0			85.2002	0			79.6944	0			79.7806
	96.7806	1			91.3069	1			84.7806	1			78.7806	1			88.5204	1			87.7806	1			87.3069	1			92.7806	1			90.434	1			87.5204	1			85.2002	1			79.6944	1			79.7806
	96.781	1			91.3071	1			84.781	1			78.781	1			88.5207	1			87.781	1			87.3071	1			92.781	1			90.4343	1			87.5207	1			85.2003	1			79.6948	1			79.781
	96.781	0			91.3071	0			84.781	0			78.781	0			88.5207	0			87.781	0			87.3071	0			92.781	0			90.4343	0			87.5207	0			85.2003	0			79.6948	0			79.781
	96.7815	0			91.3073	0			84.7815	0			78.7815	0			88.521	0			87.7815	0			87.3073	0			92.7815	0			90.4345	0			87.521	0			85.2005	0			79.6952	0			79.7815
	96.7815	1			91.3073	1			84.7815	1			78.7815	1			88.521	1			87.7815	1			87.3073	1			92.7815	1			90.4345	1			87.521	1			85.2005	1			79.6952	1			79.7815
	96.7819	1			91.3075	1			84.7819	1			78.7819	1			88.5213	1			87.7819	1			87.3075	1			92.7819	1			90.4348	1			87.5213	1			85.2006	1			79.6956	1			79.7819
	96.7819	0			91.3075	0			84.7819	0			78.7819	0			88.5213	0			87.7819	0			87.3075	0			92.7819	0			90.4348	0			87.5213	0			85.2006	0			79.6956	0			79.7819
	96.7824	0			91.3077	0			84.7824	0			78.7824	0			88.5216	0			87.7824	0			87.3077	0			92.7824	0			90.435	0			87.5216	0			85.2008	0			79.696	0			79.7824
	96.7824	1			91.3077	1			84.7824	1			78.7824	1			88.5216	1			87.7824	1			87.3077	1			92.7824	1			90.435	1			87.5216	1			85.2008	1			79.696	1			79.7824
	96.7828	1			91.3079	1			84.7828	1			78.7828	1			88.5219	1			87.7828	1			87.3079	1			92.7828	1			90.4353	1			87.5219	1			85.2009	1			79.6964	1			79.7828
	96.7828	0			91.3079	0			84.7828	0			78.7828	0			88.5219	0			87.7828	0			87.3079	0			92.7828	0			90.4353	0			87.5219	0			85.2009	0			79.6964	0			79.7828
	96.7833	0			91.3081	0			84.7833	0			78.7833	0			88.5222	0			87.7833	0			87.3081	0			92.7833	0			90.4355	0			87.5222	0			85.2011	0			79.6968	0			79.7833
	96.7833	1			91.3081	1			84.7833	1			78.7833	1			88.5222	1			87.7833	1			87.3081	1			92.7833	1			90.4355	1			87.5222	1			85.2011	1			79.6968	1			79.7833
	96.7837	1			91.3083	1			84.7837	1			78.7837	1			88.5225	1			87.7837	1			87.3083	1			92.7837	1			90.4357	1			87.5225	1			85.2012	1			79.6972	1			79.7837
	96.7837	0			91.3083	0			84.7837	0			78.7837	0			88.5225	0			87.7837	0			87.3083	0			92.7837	0			90.4357	0			87.5225	0			85.2012	0			79.6972	0			79.7837
	96.7842	0			91.3085	0			84.7842	0			78.7842	0			88.5228	0			87.7842	0			87.3085	0			92.7842	0			90.436	0			87.5228	0			85.2014	0			79.6976	0			79.7842
	96.7842	1			91.3085	1			84.7842	1			78.7842	1			88.5228	1			87.7842	1			87.3085	1			92.7842	1			90.436	1			87.5228	1			85.2014	1			79.6976	1			79.7842
	96.7846	1			91.3087	1			84.7846	1			78.7846	1			88.5231	1			87.7846	1			87.3087	1			92.7846	1			90.4363	1			87.5231	1			85.2015	1			79.698	1			79.7846
	96.7846	0			91.3087	0			84.7846	0			78.7846	0			88.5231	0			87.7846	0			87.3087	0			92.7846	0			90.4363	0			87.5231	0			85.2015	0			79.698	0			79.7846
	96.785	0			91.3089	0			84.785	0			78.785	0			88.5234	0			87.785	0			87.3089	0			92.785	0			90.4365	0			87.5234	0			85.2017	0			79.6984	0			79.785
	96.785	1			91.3089	1			84.785	1			78.785	1			88.5234	1			87.785	1			87.3089	1			92.785	1			90.4365	1			87.5234	1			85.2017	1			79.6984	1			79.785
	96.7855	1			91.3091	1			84.7855	1			78.7855	1			88.5237	1			87.7855	1			87.3091	1			92.7855	1			90.4368	1			87.5237	1			85.2018	1			79.6988	1			79.7855
	96.7855	0			91.3091	0			84.7855	0			78.7855	0			88.5237	0			87.7855	0			87.3091	0			92.7855	0			90.4368	0			87.5237	0			85.2018	0			79.6988	0			79.7855
	96.7859	0			91.3093	0			84.7859	0			78.7859	0			88.524	0			87.7859	0			87.3093	0			92.7859	0			90.437	0			87.524	0			85.202	0			79.6992	0			79.7859
	96.7859	1			91.3093	1			84.7859	1			78.7859	1			88.524	1			87.7859	1			87.3093	1			92.7859	1			90.437	1			87.524	1			85.202	1			79.6992	1			79.7859
	96.7864	1			91.3095	1			84.7864	1			78.7864	1			88.5243	1			87.7864	1			87.3095	1			92.7864	1			90.4373	1			87.5243	1			85.2021	1			79.6996	1			79.7864
	96.7864	0			91.3095	0			84.7864	0			78.7864	0			88.5243	0			87.7864	0			87.3095	0			92.7864	0			90.4373	0			87.5243	0			85.2021	0			79.6996	0			79.7864
	96.7868	0			91.3097	0			84.7868	0			78.7868	0			88.5246	0			87.7868	0			87.3097	0			92.7868	0			90.4375	0			87.5246	0			85.2023	0			79.7	0			79.7868
	96.7868	1			91.3097	1			84.7868	1			78.7868	1			88.5246	1			87.7868	1			87.3097	1			92.7868	1			90.4375	1			87.5246	1			85.2023	1			79.7	1			79.7868
	96.7873	1			91.3099	1			84.7873	1			78.7873	1			88.5249	1			87.7873	1			87.3099	1			92.7873	1			90.4378	1			87.5249	1			85.2024	1			79.7004	1			79.7873
	96.7873	0			91.3099	0			84.7873	0			78.7873	0			88.5249	0			87.7873	0			87.3099	0			92.7873	0			90.4378	0			87.5249	0			85.2024	0			79.7004	0			79.7873
	96.7877	0			91.3101	0			84.7877	0			78.7877	0			88.5251	0			87.7877	0			87.3101	0			92.7877	0			90.438	0			87.5251	0			85.2026	0			79.7008	0			79.7877
	96.7877	1			91.3101	1			84.7877	1			78.7877	1			88.5251	1			87.7877	1			87.3101	1			92.7877	1			90.438	1			87.5251	1			85.2026	1			79.7008	1			79.7877
	96.7882	1			91.3103	1			84.7882	1			78.7882	1			88.5254	1			87.7882	1			87.3103	1			92.7882	1			90.4382	1			87.5254	1			85.2027	1			79.7012	1			79.7882
	96.7882	0			91.3103	0			84.7882	0			78.7882	0			88.5254	0			87.7882	0			87.3103	0			92.7882	0			90.4382	0			87.5254	0			85.2027	0			79.7012	0			79.7882
	96.7886	0			91.3105	0			84.7886	0			78.7886	0			88.5257	0			87.7886	0			87.3105	0			92.7886	0			90.4385	0			87.5257	0			85.2029	0			79.7016	0			79.7886
	96.7886	1			91.3105	1			84.7886	1			78.7886	1			88.5257	1			87.7886	1			87.3105	1			92.7886	1			90.4385	1			87.5257	1			85.2029	1			79.7016	1			79.7886
	96.7891	1			91.3107	1			84.7891	1			78.7891	1			88.526	1			87.7891	1			87.3107	1			92.7891	1			90.4387	1			87.526	1			85.203	1			79.702	1			79.7891
	96.7891	0			91.3107	0			84.7891	0			78.7891	0			88.526	0			87.7891	0			87.3107	0			92.7891	0			90.4387	0			87.526	0			85.203	0			79.702	0			79.7891
	96.7895	0			91.3109	0			84.7895	0			78.7895	0			88.5263	0			87.7895	0			87.3109	0			92.7895	0			90.439	0			87.5263	0			85.2032	0			79.7024	0			79.7895
	96.7895	1			91.3109	1			84.7895	1			78.7895	1			88.5263	1			87.7895	1			87.3109	1			92.7895	1			90.439	1			87.5263	1			85.2032	1			79.7024	1			79.7895
	96.79	1			91.3111	1			84.79	1			78.79	1			88.5266	1			87.79	1			87.3111	1			92.79	1			90.4393	1			87.5266	1			85.2033	1			79.7028	1			79.79
	96.79	0			91.3111	0			84.79	0			78.79	0			88.5266	0			87.79	0			87.3111	0			92.79	0			90.4393	0			87.5266	0			85.2033	0			79.7028	0			79.79
	96.7904	0			91.3113	0			84.7904	0			78.7904	0			88.5269	0			87.7904	0			87.3113	0			92.7904	0			90.4395	0			87.5269	0			85.2035	0			79.7032	0			79.7904
	96.7904	1			91.3113	1			84.7904	1			78.7904	1			88.5269	1			87.7904	1			87.3113	1			92.7904	1			90.4395	1			87.5269	1			85.2035	1			79.7032	1			79.7904
	96.7908	1			91.3115	1			84.7908	1			78.7908	1			88.5272	1			87.7908	1			87.3115	1			92.7908	1			90.4398	1			87.5272	1			85.2036	1			79.7036	1			79.7908
	96.7908	0			91.3115	0			84.7908	0			78.7908	0			88.5272	0			87.7908	0			87.3115	0			92.7908	0			90.4398	0			87.5272	0			85.2036	0			79.7036	0			79.7908
	96.7913	0			91.3117	0			84.7913	0			78.7913	0			88.5275	0			87.7913	0			87.3117	0			92.7913	0			90.44	0			87.5275	0			85.2038	0			79.704	0			79.7913
	96.7913	1			91.3117	1			84.7913	1			78.7913	1			88.5275	1			87.7913	1			87.3117	1			92.7913	1			90.44	1			87.5275	1			85.2038	1			79.704	1			79.7913
	96.7917	1			91.3119	1			84.7917	1			78.7917	1			88.5278	1			87.7917	1			87.3119	1			92.7917	1			90.4403	1			87.5278	1			85.2039	1			79.7044	1			79.7917
	96.7917	0			91.3119	0			84.7917	0			78.7917	0			88.5278	0			87.7917	0			87.3119	0			92.7917	0			90.4403	0			87.5278	0			85.2039	0			79.7044	0			79.7917
	96.7922	0			91.3121	0			84.7922	0			78.7922	0			88.5281	0			87.7922	0			87.3121	0			92.7922	0			90.4405	0			87.5281	0			85.2041	0			79.7048	0			79.7922
	96.7922	1			91.3121	1			84.7922	1			78.7922	1			88.5281	1			87.7922	1			87.3121	1			92.7922	1			90.4405	1			87.5281	1			85.2041	1			79.7048	1			79.7922
	96.7926	1			91.3123	1			84.7926	1			78.7926	1			88.5284	1			87.7926	1			87.3123	1			92.7926	1			90.4408	1			87.5284	1			85.2042	1			79.7052	1			79.7926
	96.7926	0			91.3123	0			84.7926	0			78.7926	0			88.5284	0			87.7926	0			87.3123	0			92.7926	0			90.4408	0			87.5284	0			85.2042	0			79.7052	0			79.7926
	96.7931	0			91.3125	0			84.7931	0			78.7931	0			88.5287	0			87.7931	0			87.3125	0			92.7931	0			90.441	0			87.5287	0			85.2044	0			79.7056	0			79.7931
	96.7931	1			91.3125	1			84.7931	1			78.7931	1			88.5287	1			87.7931	1			87.3125	1			92.7931	1			90.441	1			87.5287	1			85.2044	1			79.7056	1			79.7931
	96.7935	1			91.3127	1			84.7935	1			78.7935	1			88.529	1			87.7935	1			87.3127	1			92.7935	1			90.4412	1			87.529	1			85.2045	1			79.706	1			79.7935
	96.7935	0			91.3127	0			84.7935	0			78.7935	0			88.529	0			87.7935	0			87.3127	0			92.7935	0			90.4412	0			87.529	0			85.2045	0			79.706	0			79.7935
	96.794	0			91.3129	0			84.794	0			78.794	0			88.5293	0			87.794	0			87.3129	0			92.794	0			90.4415	0			87.5293	0			85.2047	0			79.7064	0			79.794
	96.794	1			91.3129	1			84.794	1			78.794	1			88.5293	1			87.794	1			87.3129	1			92.794	1			90.4415	1			87.5293	1			85.2047	1			79.7064	1			79.794
	96.7944	1			91.3131	1			84.7944	1			78.7944	1			88.5296	1			87.7944	1			87.3131	1			92.7944	1			90.4417	1			87.5296	1			85.2048	1			79.7068	1			79.7944
	96.7944	0			91.3131	0			84.7944	0			78.7944	0			88.5296	0			87.7944	0			87.3131	0			92.7944	0			90.4417	0			87.5296	0			85.2048	0			79.7068	0			79.7944
	96.7949	0			91.3133	0			84.7949	0			78.7949	0			88.5299	0			87.7949	0			87.3133	0			92.7949	0			90.442	0			87.5299	0			85.205	0			79.7072	0			79.7949
	96.7949	1			91.3133	1			84.7949	1			78.7949	1			88.5299	1			87.7949	1			87.3133	1			92.7949	1			90.442	1			87.5299	1			85.205	1			79.7072	1			79.7949
	96.7953	1			91.3135	1			84.7953	1			78.7953	1			88.5302	1			87.7953	1			87.3135	1			92.7953	1			90.4423	1			87.5302	1			85.2051	1			79.7076	1			79.7953
	96.7953	0			91.3135	0			84.7953	0			78.7953	0			88.5302	0			87.7953	0			87.3135	0			92.7953	0			90.4423	0			87.5302	0			85.2051	0			79.7076	0			79.7953
	96.7957	0			91.3137	0			84.7957	0			78.7957	0			88.5305	0			87.7957	0			87.3137	0			92.7957	0			90.4425	0			87.5305	0			85.2052	0			79.708	0			79.7957
	96.7957	1			91.3137	1			84.7957	1			78.7957	1			88.5305	1			87.7957	1			87.3137	1			92.7957	1			90.4425	1			87.5305	1			85.2052	1			79.708	1			79.7957
	96.7962	1			91.3139	1			84.7962	1			78.7962	1			88.5308	1			87.7962	1			87.3139	1			92.7962	1			90.4428	1			87.5308	1			85.2054	1			79.7084	1			79.7962
	96.7962	0			91.3139	0			84.7962	0			78.7962	0			88.5308	0			87.7962	0			87.3139	0			92.7962	0			90.4428	0			87.5308	0			85.2054	0			79.7084	0			79.7962
	96.7966	0			91.3141	0			84.7966	0			78.7966	0			88.5311	0			87.7966	0			87.3141	0			92.7966	0			90.443	0			87.5311	0			85.2055	0			79.7088	0			79.7966
	96.7966	1			91.3141	1			84.7966	1			78.7966	1			88.5311	1			87.7966	1			87.3141	1			92.7966	1			90.443	1			87.5311	1			85.2055	1			79.7088	1			79.7966
	96.7971	1			91.3143	1			84.7971	1			78.7971	1			88.5314	1			87.7971	1			87.3143	1			92.7971	1			90.4433	1			87.5314	1			85.2057	1			79.7092	1			79.7971
	96.7971	0			91.3143	0			84.7971	0			78.7971	0			88.5314	0			87.7971	0			87.3143	0			92.7971	0			90.4433	0			87.5314	0			85.2057	0			79.7092	0			79.7971
	96.7975	0			91.3145	0			84.7975	0			78.7975	0			88.5317	0			87.7975	0			87.3145	0			92.7975	0			90.4435	0			87.5317	0			85.2058	0			79.7096	0			79.7975
	96.7975	1			91.3145	1			84.7975	1			78.7975	1			88.5317	1			87.7975	1			87.3145	1			92.7975	1			90.4435	1			87.5317	1			85.2058	1			79.7096	1			79.7975
	96.798	1			91.3147	1			84.798	1			78.798	1			88.532	1			87.798	1			87.3147	1			92.798	1			90.4438	1			87.532	1			85.206	1			79.71	1			79.798
	96.798	0			91.3147	0			84.798	0			78.798	0			88.532	0			87.798	0			87.3147	0			92.798	0			90.4438	0			87.532	0			85.206	0			79.71	0			79.798
	96.7984	0			91.3149	0			84.7984	0			78.7984	0			88.5323	0			87.7984	0			87.3149	0			92.7984	0			90.444	0			87.5323	0			85.2061	0			79.7104	0			79.7984
	96.7984	1			91.3149	1			84.7984	1			78.7984	1			88.5323	1			87.7984	1			87.3149	1			92.7984	1			90.444	1			87.5323	1			85.2061	1			79.7104	1			79.7984
	96.7989	1			91.315	1			84.7989	1			78.7989	1			88.5326	1			87.7989	1			87.315	1			92.7989	1			90.4442	1			87.5326	1			85.2063	1			79.7108	1			79.7989
	96.7989	0			91.315	0			84.7989	0			78.7989	0			88.5326	0			87.7989	0			87.315	0			92.7989	0			90.4442	0			87.5326	0			85.2063	0			79.7108	0			79.7989
	96.7993	0			91.3152	0			84.7993	0			78.7993	0			88.5329	0			87.7993	0			87.3152	0			92.7993	0			90.4445	0			87.5329	0			85.2064	0			79.7112	0			79.7993
	96.7993	1			91.3152	1			84.7993	1			78.7993	1			88.5329	1			87.7993	1			87.3152	1			92.7993	1			90.4445	1			87.5329	1			85.2064	1			79.7112	1			79.7993
	96.7998	1			91.3154	1			84.7998	1			78.7998	1			88.5332	1			87.7998	1			87.3154	1			92.7998	1			90.4447	1			87.5332	1			85.2066	1			79.7116	1			79.7998
	96.7998	0			91.3154	0			84.7998	0			78.7998	0			88.5332	0			87.7998	0			87.3154	0			92.7998	0			90.4447	0			87.5332	0			85.2066	0			79.7116	0			79.7998
	96.8002	0			91.3156	0			84.8002	0			78.8002	0			88.5335	0			87.8002	0			87.3156	0			92.8002	0			90.445	0			87.5335	0			85.2067	0			79.712	0			79.8002
	96.8002	1			91.3156	1			84.8002	1			78.8002	1			88.5335	1			87.8002	1			87.3156	1			92.8002	1			90.445	1			87.5335	1			85.2067	1			79.712	1			79.8002
	96.8006	1			91.3158	1			84.8006	1			78.8006	1			88.5338	1			87.8006	1			87.3158	1			92.8006	1			90.4453	1			87.5338	1			85.2069	1			79.7124	1			79.8006
	96.8006	0			91.3158	0			84.8006	0			78.8006	0			88.5338	0			87.8006	0			87.3158	0			92.8006	0			90.4453	0			87.5338	0			85.2069	0			79.7124	0			79.8006
	96.8011	0			91.316	0			84.8011	0			78.8011	0			88.5341	0			87.8011	0			87.316	0			92.8011	0			90.4455	0			87.5341	0			85.207	0			79.7128	0			79.8011
	96.8011	1			91.316	1			84.8011	1			78.8011	1			88.5341	1			87.8011	1			87.316	1			92.8011	1			90.4455	1			87.5341	1			85.207	1			79.7128	1			79.8011
	96.8015	1			91.3162	1			84.8015	1			78.8015	1			88.5344	1			87.8015	1			87.3162	1			92.8015	1			90.4458	1			87.5344	1			85.2072	1			79.7132	1			79.8015
	96.8015	0			91.3162	0			84.8015	0			78.8015	0			88.5344	0			87.8015	0			87.3162	0			92.8015	0			90.4458	0			87.5344	0			85.2072	0			79.7132	0			79.8015
	96.802	0			91.3164	0			84.802	0			78.802	0			88.5347	0			87.802	0			87.3164	0			92.802	0			90.446	0			87.5347	0			85.2073	0			79.7136	0			79.802
	96.802	1			91.3164	1			84.802	1			78.802	1			88.5347	1			87.802	1			87.3164	1			92.802	1			90.446	1			87.5347	1			85.2073	1			79.7136	1			79.802
	96.8024	1			91.3166	1			84.8024	1			78.8024	1			88.535	1			87.8024	1			87.3166	1			92.8024	1			90.4463	1			87.535	1			85.2075	1			79.714	1			79.8024
	96.8024	0			91.3166	0			84.8024	0			78.8024	0			88.535	0			87.8024	0			87.3166	0			92.8024	0			90.4463	0			87.535	0			85.2075	0			79.714	0			79.8024
	96.8029	0			91.3168	0			84.8029	0			78.8029	0			88.5352	0			87.8029	0			87.3168	0			92.8029	0			90.4465	0			87.5352	0			85.2076	0			79.7144	0			79.8029
	96.8029	1			91.3168	1			84.8029	1			78.8029	1			88.5352	1			87.8029	1			87.3168	1			92.8029	1			90.4465	1			87.5352	1			85.2076	1			79.7144	1			79.8029
	96.8033	1			91.317	1			84.8033	1			78.8033	1			88.5355	1			87.8033	1			87.317	1			92.8033	1			90.4468	1			87.5355	1			85.2078	1			79.7148	1			79.8033
	96.8033	0			91.317	0			84.8033	0			78.8033	0			88.5355	0			87.8033	0			87.317	0			92.8033	0			90.4468	0			87.5355	0			85.2078	0			79.7148	0			79.8033
	96.8038	0			91.3172	0			84.8038	0			78.8038	0			88.5358	0			87.8038	0			87.3172	0			92.8038	0			90.447	0			87.5358	0			85.2079	0			79.7152	0			79.8038
	96.8038	1			91.3172	1			84.8038	1			78.8038	1			88.5358	1			87.8038	1			87.3172	1			92.8038	1			90.447	1			87.5358	1			85.2079	1			79.7152	1			79.8038
	96.8042	1			91.3174	1			84.8042	1			78.8042	1			88.5361	1			87.8042	1			87.3174	1			92.8042	1			90.4472	1			87.5361	1			85.2081	1			79.7156	1			79.8042
	96.8042	0			91.3174	0			84.8042	0			78.8042	0			88.5361	0			87.8042	0			87.3174	0			92.8042	0			90.4472	0			87.5361	0			85.2081	0			79.7156	0			79.8042
	96.8047	0			91.3176	0			84.8047	0			78.8047	0			88.5364	0			87.8047	0			87.3176	0			92.8047	0			90.4475	0			87.5364	0			85.2082	0			79.716	0			79.8047
	96.8047	1			91.3176	1			84.8047	1			78.8047	1			88.5364	1			87.8047	1			87.3176	1			92.8047	1			90.4475	1			87.5364	1			85.2082	1			79.716	1			79.8047
	96.8051	1			91.3178	1			84.8051	1			78.8051	1			88.5367	1			87.8051	1			87.3178	1			92.8051	1			90.4477	1			87.5367	1			85.2084	1			79.7164	1			79.8051
	96.8051	0			91.3178	0			84.8051	0			78.8051	0			88.5367	0			87.8051	0			87.3178	0			92.8051	0			90.4477	0			87.5367	0			85.2084	0			79.7164	0			79.8051
	96.8055	0			91.318	0			84.8055	0			78.8055	0			88.537	0			87.8055	0			87.318	0			92.8055	0			90.448	0			87.537	0			85.2085	0			79.7168	0			79.8055
	96.8055	1			91.318	1			84.8055	1			78.8055	1			88.537	1			87.8055	1			87.318	1			92.8055	1			90.448	1			87.537	1			85.2085	1			79.7168	1			79.8055
	96.806	1			91.3182	1			84.806	1			78.806	1			88.5373	1			87.806	1			87.3182	1			92.806	1			90.4483	1			87.5373	1			85.2087	1			79.7172	1			79.806
	96.806	0			91.3182	0			84.806	0			78.806	0			88.5373	0			87.806	0			87.3182	0			92.806	0			90.4483	0			87.5373	0			85.2087	0			79.7172	0			79.806
	96.8064	0			91.3184	0			84.8064	0			78.8064	0			88.5376	0			87.8064	0			87.3184	0			92.8064	0			90.4485	0			87.5376	0			85.2088	0			79.7176	0			79.8064
	96.8064	1			91.3184	1			84.8064	1			78.8064	1			88.5376	1			87.8064	1			87.3184	1			92.8064	1			90.4485	1			87.5376	1			85.2088	1			79.7176	1			79.8064
	96.8069	1			91.3186	1			84.8069	1			78.8069	1			88.5379	1			87.8069	1			87.3186	1			92.8069	1			90.4488	1			87.5379	1			85.209	1			79.718	1			79.8069
	96.8069	0			91.3186	0			84.8069	0			78.8069	0			88.5379	0			87.8069	0			87.3186	0			92.8069	0			90.4488	0			87.5379	0			85.209	0			79.718	0			79.8069
	96.8073	0			91.3188	0			84.8073	0			78.8073	0			88.5382	0			87.8073	0			87.3188	0			92.8073	0			90.449	0			87.5382	0			85.2091	0			79.7184	0			79.8073
	96.8073	1			91.3188	1			84.8073	1			78.8073	1			88.5382	1			87.8073	1			87.3188	1			92.8073	1			90.449	1			87.5382	1			85.2091	1			79.7184	1			79.8073
	96.8078	1			91.319	1			84.8078	1			78.8078	1			88.5385	1			87.8078	1			87.319	1			92.8078	1			90.4493	1			87.5385	1			85.2093	1			79.7188	1			79.8078
	96.8078	0			91.319	0			84.8078	0			78.8078	0			88.5385	0			87.8078	0			87.319	0			92.8078	0			90.4493	0			87.5385	0			85.2093	0			79.7188	0			79.8078
	96.8082	0			91.3192	0			84.8082	0			78.8082	0			88.5388	0			87.8082	0			87.3192	0			92.8082	0			90.4495	0			87.5388	0			85.2094	0			79.7192	0			79.8082
	96.8082	1			91.3192	1			84.8082	1			78.8082	1			88.5388	1			87.8082	1			87.3192	1			92.8082	1			90.4495	1			87.5388	1			85.2094	1			79.7192	1			79.8082
	96.8087	1			91.3194	1			84.8087	1			78.8087	1			88.5391	1			87.8087	1			87.3194	1			92.8087	1			90.4498	1			87.5391	1			85.2096	1			79.7196	1			79.8087
	96.8087	0			91.3194	0			84.8087	0			78.8087	0			88.5391	0			87.8087	0			87.3194	0			92.8087	0			90.4498	0			87.5391	0			85.2096	0			79.7196	0			79.8087
	96.8091	0			91.3196	0			84.8091	0			78.8091	0			88.5394	0			87.8091	0			87.3196	0			92.8091	0							87.5394	0			85.2097	0							79.8091
	96.8091	1			91.3196	1			84.8091	1			78.8091	1			88.5394	1			87.8091	1			87.3196	1			92.8091	1							87.5394	1			85.2097	1							79.8091
	96.8096	1			91.3198	1			84.8096	1			78.8096	1			88.5397	1			87.8096	1			87.3198	1			92.8096	1							87.5397	1			85.2099	1							79.8096
	96.8096	0			91.3198	0			84.8096	0			78.8096	0			88.5397	0			87.8096	0			87.3198	0			92.8096	0							87.5397	0			85.2099	0							79.8096
[truncated: 203 more columns]

## Sheet: Sheet3_HID3
0.821092	-0.401693
0.774031	-0.422449
2.60454	0.528726
2.47339	0.941414
1.88634	0.802335
0.675785	-0.619435
0.41657	-0.994411
0.276162	-1.11181
0.141713	-1.2646
2.23844	0.823692
-2.07718	2.58267
-3.22424	2.83722
-0.551897	0.3758
-1.64365	-0.232507
-2.43759	-1.94843
-2.3735	-1.89653

## Sheet: Sheet3_HID2
0.821092	-0.401693
0.774031	-0.422449
2.60454	0.528726
2.47339	0.941414
1.88634	0.802335
0.675785	-0.619435
0.41657	-0.994411
0.276162	-1.11181
0.141713	-1.2646
2.23844	0.823692
-2.07718	2.58267
-3.22424	2.83722
-0.551897	0.3758
-1.64365	-0.232507
-2.43759	-1.94843
-2.3735	-1.89653

## Sheet: Sheet3_HID1
1	-3.14159	-1	1.02068e-11	1	-3.14159	0.0786278	-0.513259	1	-3.14159	-0.169293	-0.796562	1	-3.14159	1.45485	0.127048	1	-3.14159	1.57119	0.538649	1	-3.14159	0.985853	0.420407	1	-3.14159	-0.443341	-0.746904	1	-3.14159	-0.714675	-1.23267	1	-3.14159	-0.897695	-1.14138	1	-3.14159	-0.933126	-1.46499	1	-3.14159	1.28703	0.539927	1	-3.14159	-3.77879	3.51597	1	-3.14159
2	-3.129	-0.999921	-0.0125912	2	-3.12058	0.0788065	-0.521448	2	-3.12058	-0.169081	-0.806984	2	-3.12058	1.45508	0.115499	2	-3.12058	1.57139	0.529257	2	-3.12058	0.986075	0.410212	2	-3.12058	-0.4431	-0.758653	2	-3.12058	-0.714426	-1.24276	2	-3.12058	-0.897449	-1.15398	2	-3.12058	-0.932877	-1.4749	2	-3.12058	1.28726	0.52801	2	-3.12058	-3.77844	3.4928	2	-3.12058
3	-3.11641	-0.999683	-0.0251804	3	-3.09956	0.0793427	-0.529567	3	-3.09956	-0.168446	-0.817243	3	-3.09956	1.45579	0.10414	3	-3.09956	1.57201	0.52002	3	-3.09956	0.986741	0.400193	3	-3.09956	-0.442379	-0.770326	3	-3.09956	-0.71368	-1.25275	3	-3.09956	-0.896711	-1.16655	3	-3.09956	-0.932131	-1.4847	3	-3.09956	1.28794	0.516213	3	-3.09956	-3.7774	3.4693	3	-3.09956
4	-3.10382	-0.999287	-0.0377657	4	-3.07855	0.0802359	-0.537613	4	-3.07855	-0.167388	-0.827337	4	-3.07855	1.45696	0.0929783	4	-3.07855	1.57305	0.510942	4	-3.07855	0.98785	0.390352	4	-3.07855	-0.441176	-0.781916	4	-3.07855	-0.712437	-1.26263	4	-3.07855	-0.895481	-1.1791	4	-3.07855	-0.930889	-1.4944	4	-3.07855	1.28909	0.504541	4	-3.07855	-3.77567	3.4455	4	-3.07855
5	-3.09123	-0.998732	-0.0503449	5	-3.05754	0.081486	-0.545581	5	-3.05754	-0.165907	-0.83726	5	-3.05754	1.45861	0.0820171	5	-3.05754	1.57449	0.502028	5	-3.05754	0.989402	0.380696	5	-3.05754	-0.439494	-0.79342	5	-3.05754	-0.710698	-1.2724	5	-3.05754	-0.89376	-1.1916	5	-3.05754	-0.92915	-1.50399	5	-3.05754	1.29069	0.492998	5	-3.05754	-3.77325	3.4214	5	-3.05754
6	-3.07863	-0.998019	-0.0629162	6	-3.03652	0.0830922	-0.553468	6	-3.03652	-0.164005	-0.847007	6	-3.03652	1.46072	0.0712617	6	-3.03652	1.57635	0.49328	6	-3.03652	0.991397	0.371228	6	-3.03652	-0.437332	-0.804832	6	-3.03652	-0.708462	-1.28206	6	-3.03652	-0.891548	-1.20406	6	-3.03652	-0.926916	-1.51346	6	-3.03652	1.29274	0.48159	6	-3.03652	-3.77013	3.397	6	-3.03652
7	-3.06604	-0.997148	-0.0754775	7	-3.01551	0.0850539	-0.561272	7	-3.01551	-0.161681	-0.856576	7	-3.01551	1.4633	0.0607168	7	-3.01551	1.57861	0.484703	7	-3.01551	0.993833	0.361952	7	-3.01551	-0.434692	-0.816146	7	-3.01551	-0.705733	-1.29159	7	-3.01551	-0.888846	-1.21647	7	-3.01551	-0.924188	-1.52281	7	-3.01551	1.29525	0.470322	7	-3.01551	-3.76632	3.37233	7	-3.01551
8	-3.05345	-0.996118	-0.0880268	8	-2.99449	0.0873703	-0.568987	8	-2.99449	-0.158938	-0.865961	8	-2.99449	1.46635	0.0503871	8	-2.99449	1.58129	0.476301	8	-2.99449	0.996709	0.352872	8	-2.99449	-0.431575	-0.827359	8	-2.99449	-0.702509	-1.301	8	-2.99449	-0.885656	-1.22882	8	-2.99449	-0.920966	-1.53204	8	-2.99449	1.29822	0.459199	8	-2.99449	-3.76183	3.34739	8	-2.99449
9	-3.04086	-0.994931	-0.100562	9	-2.97348	0.0900403	-0.576611	9	-2.97348	-0.155775	-0.875158	9	-2.97348	1.46987	0.0402772	9	-2.97348	1.58437	0.468078	9	-2.97348	1.00002	0.343993	9	-2.97348	-0.427981	-0.838465	9	-2.97348	-0.698794	-1.31029	9	-2.97348	-0.88198	-1.24112	9	-2.97348	-0.917253	-1.54114	9	-2.97348	1.30163	0.448226	9	-2.97348	-3.75665	3.32219	9	-2.97348
10	-3.02827	-0.993586	-0.113082	10	-2.95247	0.0930626	-0.584141	10	-2.95247	-0.152195	-0.884163	10	-2.95247	1.47384	0.0303915	10	-2.95247	1.58787	0.460036	10	-2.95247	1.00378	0.335319	10	-2.95247	-0.423913	-0.849458	10	-2.95247	-0.694588	-1.31944	10	-2.95247	-0.877818	-1.25335	10	-2.95247	-0.913049	-1.55011	10	-2.95247	1.3055	0.437407	10	-2.95247	-3.75079	3.29675	10	-2.95247
11	-3.01568	-0.992083	-0.125583	11	-2.93145	0.0964361	-0.591573	11	-2.93145	-0.148199	-0.892972	11	-2.93145	1.47828	0.0207344	11	-2.93145	1.59176	0.45218	11	-2.93145	1.00797	0.326852	11	-2.93145	-0.419373	-0.860335	11	-2.93145	-0.689894	-1.32845	11	-2.93145	-0.873172	-1.26551	11	-2.93145	-0.908357	-1.55894	11	-2.93145	1.30982	0.426748	11	-2.93145	-3.74424	3.27107	11	-2.93145
12	-3.00309	-0.990423	-0.138065	12	-2.91044	0.100159	-0.598904	12	-2.91044	-0.14379	-0.901582	12	-2.91044	1.48318	0.0113101	12	-2.91044	1.59606	0.444513	12	-2.91044	1.01259	0.318598	12	-2.91044	-0.414362	-0.871091	12	-2.91044	-0.684713	-1.33733	12	-2.91044	-0.868045	-1.2776	12	-2.91044	-0.903179	-1.56763	12	-2.91044	1.31458	0.416253	12	-2.91044	-3.73702	3.24517	12	-2.91044
13	-2.99049	-0.988606	-0.150524	13	-2.88942	0.10423	-0.606131	13	-2.88942	-0.138968	-0.909989	13	-2.88942	1.48854	0.00212287	13	-2.88942	1.60077	0.437038	13	-2.88942	1.01764	0.310559	13	-2.88942	-0.408883	-0.88172	13	-2.88942	-0.679048	-1.34606	13	-2.88942	-0.862439	-1.2896	13	-2.88942	-0.897517	-1.57618	13	-2.88942	1.31979	0.405927	13	-2.88942	-3.72912	3.21905	13	-2.88942
14	-2.9779	-0.986633	-0.16296	14	-2.86841	0.108647	-0.61325	14	-2.86841	-0.133735	-0.918188	14	-2.86841	1.49435	-0.00682332	14	-2.86841	1.60587	0.429759	14	-2.86841	1.02313	0.30274	14	-2.86841	-0.402938	-0.892219	14	-2.86841	-0.672901	-1.35465	14	-2.86841	-0.856356	-1.30152	14	-2.86841	-0.891374	-1.58458	14	-2.86841	1.32545	0.395773	14	-2.86841	-3.72055	3.19274	14	-2.86841
15	-2.96531	-0.984503	-0.17537	15	-2.8474	0.113409	-0.620259	15	-2.8474	-0.128096	-0.926176	15	-2.8474	1.50061	-0.0155245	15	-2.8474	1.61137	0.422679	15	-2.8474	1.02904	0.295142	15	-2.8474	-0.39653	-0.902581	15	-2.8474	-0.666276	-1.36308	15	-2.8474	-0.8498	-1.31334	15	-2.8474	-0.884751	-1.59284	15	-2.8474	1.33154	0.385798	15	-2.8474	-3.71132	3.16623	15	-2.8474
16	-2.95272	-0.982216	-0.187752	16	-2.82638	0.118512	-0.627153	16	-2.82638	-0.122051	-0.93395	16	-2.82638	1.50733	-0.0239768	16	-2.82638	1.61727	0.415801	16	-2.82638	1.03538	0.287771	16	-2.82638	-0.389662	-0.912804	16	-2.82638	-0.659174	-1.37136	16	-2.82638	-0.842772	-1.32507	16	-2.82638	-0.877653	-1.60093	16	-2.82638	1.33807	0.376005	16	-2.82638	-3.70142	3.13955	16	-2.82638
17	-2.94013	-0.979775	-0.200105	17	-2.80537	0.123956	-0.633931	17	-2.80537	-0.115603	-0.941507	17	-2.80537	1.51449	-0.0321765	17	-2.80537	1.62356	0.409129	17	-2.80537	1.04214	0.280629	17	-2.80537	-0.382336	-0.922882	17	-2.80537	-0.651599	-1.37948	17	-2.80537	-0.835276	-1.33669	17	-2.80537	-0.870083	-1.60887	17	-2.80537	1.34504	0.366399	17	-2.80537	-3.69086	3.1127	17	-2.80537
18	-2.92754	-0.977177	-0.212425	18	-2.78435	0.129737	-0.64059	18	-2.78435	-0.108756	-0.948842	18	-2.78435	1.5221	-0.04012	18	-2.78435	1.63024	0.402664	18	-2.78435	1.04932	0.27372	18	-2.78435	-0.374555	-0.93281	18	-2.78435	-0.643555	-1.38743	18	-2.78435	-0.827315	-1.34821	18	-2.78435	-0.862042	-1.61664	18	-2.78435	1.35244	0.356983	18	-2.78435	-3.67964	3.0857	18	-2.78435
19	-2.91494	-0.974425	-0.224712	19	-2.76334	0.135852	-0.647125	19	-2.76334	-0.101512	-0.955953	19	-2.76334	1.53015	-0.0478038	19	-2.76334	1.6373	0.39641	19	-2.76334	1.05691	0.267046	19	-2.76334	-0.366325	-0.942585	19	-2.76334	-0.635045	-1.39522	19	-2.76334	-0.818894	-1.35962	19	-2.76334	-0.853537	-1.62426	19	-2.76334	1.36026	0.347762	19	-2.76334	-3.66778	3.05856	19	-2.76334
20	-2.90235	-0.971518	-0.236964	20	-2.74233	0.1423	-0.653535	20	-2.74233	-0.093875	-0.962836	20	-2.74233	1.53863	-0.0552245	20	-2.74233	1.64475	0.39037	20	-2.74233	1.06492	0.26061	20	-2.74233	-0.357647	-0.952203	20	-2.74233	-0.626072	-1.40285	20	-2.74233	-0.810014	-1.3709	20	-2.74233	-0.844569	-1.6317	20	-2.74233	1.36851	0.33874	20	-2.74233	-3.65527	3.03129	20	-2.74233
21	-2.88976	-0.968458	-0.249178	21	-2.72131	0.149078	-0.659816	21	-2.72131	-0.0858476	-0.969489	21	-2.72131	1.54755	-0.0623788	21	-2.72131	1.65258	0.384546	21	-2.72131	1.07333	0.254415	21	-2.72131	-0.348525	-0.961658	21	-2.72131	-0.616642	-1.41029	21	-2.72131	-0.800682	-1.38207	21	-2.72131	-0.835143	-1.63897	21	-2.72131	1.37719	0.329921	21	-2.72131	-3.64212	3.0039	21	-2.72131
22	-2.87717	-0.965244	-0.261352	22	-2.7003	0.156181	-0.665966	22	-2.7003	-0.0774336	-0.975909	22	-2.7003	1.55689	-0.0692635	22	-2.7003	1.66079	0.378941	22	-2.7003	1.08215	0.248465	22	-2.7003	-0.338965	-0.970947	22	-2.7003	-0.606757	-1.41757	22	-2.7003	-0.7909	-1.39311	22	-2.7003	-0.825263	-1.64606	22	-2.7003	1.38628	0.321309	22	-2.7003	-3.62834	2.97641	22	-2.7003
23	-2.86458	-0.961876	-0.273485	23	-2.67928	0.163608	-0.671982	23	-2.67928	-0.0686368	-0.982092	23	-2.67928	1.56667	-0.0758757	23	-2.67928	1.66937	0.373557	23	-2.67928	1.09137	0.24276	23	-2.67928	-0.328969	-0.980065	23	-2.67928	-0.596422	-1.42466	23	-2.67928	-0.780672	-1.40401	23	-2.67928	-0.814933	-1.65298	23	-2.67928	1.39578	0.312908	23	-2.67928	-3.61393	2.94882	23	-2.67928
24	-2.85199	-0.958357	-0.285574	24	-2.65827	0.171355	-0.677862	24	-2.65827	-0.059461	-0.988036	24	-2.65827	1.57686	-0.0822123	24	-2.65827	1.67832	0.368397	24	-2.65827	1.10099	0.237305	24	-2.65827	-0.318543	-0.989009	24	-2.65827	-0.585642	-1.43157	24	-2.65827	-0.770005	-1.41478	24	-2.65827	-0.804159	-1.65972	24	-2.65827	1.4057	0.304721	24	-2.65827	-3.59891	2.92115	24	-2.65827
25	-2.8394	-0.954685	-0.297619	25	-2.63726	0.179418	-0.683602	25	-2.63726	-0.0499103	-0.993738	25	-2.63726	1.58747	-0.0882707	25	-2.63726	1.68763	0.363463	25	-2.63726	1.111	0.232102	25	-2.63726	-0.307691	-0.997775	25	-2.63726	-0.574422	-1.4383	25	-2.63726	-0.758901	-1.42541	25	-2.63726	-0.792944	-1.66627	25	-2.63726	1.41602	0.296752	25	-2.63726	-3.58326	2.89341	25	-2.63726
26	-2.8268	-0.950862	-0.309616	26	-2.61624	0.187794	-0.689201	26	-2.61624	-0.0399889	-0.999197	26	-2.61624	1.59849	-0.094048	26	-2.61624	1.69731	0.358757	26	-2.61624	1.12141	0.227152	26	-2.61624	-0.296418	-1.00636	26	-2.61624	-0.562766	-1.44483	26	-2.61624	-0.747366	-1.43589	26	-2.61624	-0.781294	-1.67263	26	-2.61624	1.42673	0.289005	26	-2.61624	-3.56701	2.86561	26	-2.61624
27	-2.81421	-0.946888	-0.321564	27	-2.59523	0.19648	-0.694656	27	-2.59523	-0.0297012	-1.00441	27	-2.59523	1.60992	-0.0995418	27	-2.59523	1.70735	0.354282	27	-2.59523	1.13219	0.222458	27	-2.59523	-0.284728	-1.01476	27	-2.59523	-0.55068	-1.45118	27	-2.59523	-0.735406	-1.44621	27	-2.59523	-0.769214	-1.67881	27	-2.59523	1.43785	0.281482	27	-2.59523	-3.55017	2.83778	27	-2.59523
28	-2.80162	-0.942764	-0.333461	28	-2.57421	0.205471	-0.699963	28	-2.57421	-0.0190518	-1.00937	28	-2.57421	1.62175	-0.10475	28	-2.57421	1.71773	0.350039	28	-2.57421	1.14335	0.218023	28	-2.57421	-0.272628	-1.02296	28	-2.57421	-0.538168	-1.45733	28	-2.57421	-0.723025	-1.45639	28	-2.57421	-0.756709	-1.68479	28	-2.57421	1.44936	0.274188	28	-2.57421	-3.53272	2.8099	28	-2.57421
29	-2.78903	-0.938491	-0.345305	29	-2.5532	0.214763	-0.705122	29	-2.5532	-0.00804524	-1.01408	29	-2.5532	1.63398	-0.109669	29	-2.5532	1.72847	0.34603	29	-2.5532	1.15489	0.213847	29	-2.5532	-0.260121	-1.03098	29	-2.5532	-0.525238	-1.46329	29	-2.5532	-0.710228	-1.4664	29	-2.5532	-0.743785	-1.69057	29	-2.5532	1.46125	0.267125	29	-2.5532	-3.5147	2.78201	29	-2.5532
30	-2.77644	-0.934068	-0.357094	30	-2.53219	0.224353	-0.71013	30	-2.53219	0.00331349	-1.01854	30	-2.53219	1.6466	-0.114298	30	-2.53219	1.73955	0.342257	30	-2.53219	1.1668	0.209933	30	-2.53219	-0.247215	-1.0388	30	-2.53219	-0.511893	-1.46904	30	-2.53219	-0.697023	-1.47625	30	-2.53219	-0.730448	-1.69616	30	-2.53219	1.47352	0.260297	30	-2.53219	-3.49609	2.75411	30	-2.53219
31	-2.76385	-0.929498	-0.368827	31	-2.51117	0.234236	-0.714984	31	-2.51117	0.0150194	-1.02275	31	-2.51117	1.6596	-0.118635	31	-2.51117	1.75097	0.338721	31	-2.51117	1.17907	0.206283	31	-2.51117	-0.233914	-1.04641	31	-2.51117	-0.498141	-1.47459	31	-2.51117	-0.683413	-1.48592	31	-2.51117	-0.716702	-1.70155	31	-2.51117	1.48617	0.253707	31	-2.51117	-3.47692	2.72622	31	-2.51117
32	-2.75125	-0.92478	-0.380501	32	-2.49016	0.244408	-0.719683	32	-2.49016	0.0270673	-1.02669	32	-2.49016	1.67298	-0.122677	32	-2.49016	1.76272	0.335425	32	-2.49016	1.1917	0.202898	32	-2.49016	-0.220224	-1.05383	32	-2.49016	-0.483986	-1.47994	32	-2.49016	-0.669406	-1.49543	32	-2.49016	-0.702555	-1.70674	32	-2.49016	1.49919	0.247357	32	-2.49016	-3.45719	2.69834	32	-2.49016
33	-2.73866	-0.919916	-0.392115	33	-2.46914	0.254864	-0.724224	33	-2.46914	0.039452	-1.03038	33	-2.46914	1.68674	-0.126424	33	-2.46914	1.7748	0.332369	33	-2.46914	1.20469	0.199779	33	-2.46914	-0.206152	-1.06103	33	-2.46914	-0.469437	-1.48508	33	-2.46914	-0.655008	-1.50476	33	-2.46914	-0.688013	-1.71172	33	-2.46914	1.51257	0.24125	33	-2.46914	-3.43691	2.67049	33	-2.46914
34	-2.72607	-0.914906	-0.403667	34	-2.44813	0.265599	-0.728605	34	-2.44813	0.0521678	-1.03381	34	-2.44813	1.70087	-0.129872	34	-2.44813	1.7872	0.329555	34	-2.44813	1.21802	0.196929	34	-2.44813	-0.191704	-1.06803	34	-2.44813	-0.454498	-1.49002	34	-2.44813	-0.640224	-1.5139	34	-2.44813	-0.673082	-1.71649	34	-2.44813	1.52631	0.23539	34	-2.44813	-3.41608	2.64269	34	-2.44813
35	-2.71348	-0.909751	-0.415155	35	-2.42712	0.27661	-0.732825	35	-2.42712	0.0652093	-1.03697	35	-2.42712	1.71535	-0.133021	35	-2.42712	1.79992	0.326984	35	-2.42712	1.23169	0.194348	35	-2.42712	-0.176885	-1.07481	35	-2.42712	-0.439176	-1.49474	35	-2.42712	-0.625062	-1.52286	35	-2.42712	-0.657768	-1.72105	35	-2.42712	1.5404	0.229778	35	-2.42712	-3.39472	2.61493	35	-2.42712
36	-2.70089	-0.904451	-0.426577	36	-2.4061	0.28789	-0.736881	36	-2.4061	0.0785706	-1.03988	36	-2.4061	1.7302	-0.135869	36	-2.4061	1.81295	0.324658	36	-2.4061	1.24569	0.192037	36	-2.4061	-0.161703	-1.08138	36	-2.4061	-0.423479	-1.49925	36	-2.4061	-0.609528	-1.53163	36	-2.4061	-0.642079	-1.72541	36	-2.4061	1.55483	0.224417	36	-2.4061	-3.37284	2.58725	36	-2.4061
37	-2.6883	-0.899009	-0.437931	37	-2.38509	0.299436	-0.740772	37	-2.38509	0.0922459	-1.04251	37	-2.38509	1.74539	-0.138415	37	-2.38509	1.82629	0.322577	37	-2.38509	1.26003	0.189998	37	-2.38509	-0.146164	-1.08773	37	-2.38509	-0.407413	-1.50354	37	-2.38509	-0.593629	-1.54021	37	-2.38509	-0.626021	-1.72955	37	-2.38509	1.56961	0.219309	37	-2.38509	-3.35044	2.55964	37	-2.38509
38	-2.67571	-0.893423	-0.449216	38	-2.36407	0.311241	-0.744496	38	-2.36407	0.106229	-1.04489	38	-2.36407	1.76092	-0.140658	38	-2.36407	1.83993	0.320742	38	-2.36407	1.27469	0.188231	38	-2.36407	-0.130276	-1.09385	38	-2.36407	-0.390985	-1.50762	38	-2.36407	-0.577372	-1.54859	38	-2.36407	-0.609602	-1.73347	38	-2.36407	1.58472	0.214457	38	-2.36407	-3.32754	2.53212	38	-2.36407
39	-2.66311	-0.887696	-0.46043	39	-2.34306	0.323302	-0.748052	39	-2.34306	0.120514	-1.04699	39	-2.34306	1.77679	-0.142597	39	-2.34306	1.85387	0.319154	39	-2.34306	1.28967	0.186738	39	-2.34306	-0.114044	-1.09976	39	-2.34306	-0.374203	-1.51147	39	-2.34306	-0.560764	-1.55677	39	-2.34306	-0.592828	-1.73718	39	-2.34306	1.60015	0.209864	39	-2.34306	-3.30414	2.50471	39	-2.34306
40	-2.65052	-0.881829	-0.47157	40	-2.32205	0.335611	-0.751437	40	-2.32205	0.135094	-1.04883	40	-2.32205	1.79299	-0.144231	40	-2.32205	1.86809	0.317814	40	-2.32205	1.30495	0.185518	40	-2.32205	-0.0974772	-1.10543	40	-2.32205	-0.357074	-1.51511	40	-2.32205	-0.543813	-1.56474	40	-2.32205	-0.575708	-1.74067	40	-2.32205	1.6159	0.20553	40	-2.32205	-3.28026	2.47741	40	-2.32205
41	-2.63793	-0.875821	-0.482636	41	-2.30103	0.348165	-0.754651	41	-2.30103	0.149964	-1.0504	41	-2.30103	1.80951	-0.14556	41	-2.30103	1.88259	0.316723	41	-2.30103	1.32054	0.184573	41	-2.30103	-0.0805817	-1.11087	41	-2.30103	-0.339605	-1.51852	41	-2.30103	-0.526526	-1.57251	41	-2.30103	-0.558248	-1.74394	41	-2.30103	1.63197	0.201457	41	-2.30103	-3.25591	2.45024	41	-2.30103
42	-2.62534	-0.869675	-0.493626	42	-2.28002	0.360957	-0.757691	42	-2.28002	0.165116	-1.0517	42	-2.28002	1.82634	-0.146582	42	-2.28002	1.89737	0.31588	42	-2.28002	1.33642	0.183902	42	-2.28002	-0.0633653	-1.11609	42	-2.28002	-0.321804	-1.52171	42	-2.28002	-0.50891	-1.58006	42	-2.28002	-0.540456	-1.74698	42	-2.28002	1.64834	0.197649	42	-2.28002	-3.23109	2.4232	42	-2.28002
43	-2.61275	-0.86339	-0.504537	43	-2.259	0.373982	-0.760557	43	-2.259	0.180543	-1.05273	43	-2.259	1.84348	-0.147297	43	-2.259	1.91242	0.315286	43	-2.259	1.3526	0.183507	43	-2.259	-0.0458356	-1.12106	43	-2.259	-0.303679	-1.52468	43	-2.259	-0.490974	-1.5874	43	-2.259	-0.522341	-1.74981	43	-2.259	1.66501	0.194106	43	-2.259	-3.20582	2.39632	43	-2.259
44	-2.60016	-0.856969	-0.515368	44	-2.23799	0.387234	-0.763247	44	-2.23799	0.19624	-1.05349	44	-2.23799	1.86091	-0.147705	44	-2.23799	1.92773	0.314942	44	-2.23799	1.36905	0.183386	44	-2.23799	-0.0280003	-1.1258	44	-2.23799	-0.285239	-1.52742	44	-2.23799	-0.472725	-1.59453	44	-2.23799	-0.50391	-1.75241	44	-2.23799	1.68197	0.190829	44	-2.23799	-3.18012	2.3696	44	-2.23799
45	-2.58756	-0.850412	-0.526117	45	-2.21698	0.400707	-0.765761	45	-2.21698	0.212198	-1.05398	45	-2.21698	1.87864	-0.147806	45	-2.21698	1.94329	0.314848	45	-2.21698	1.38578	0.183541	45	-2.21698	-0.00986725	-1.13031	45	-2.21698	-0.26649	-1.52993	45	-2.21698	-0.454172	-1.60143	45	-2.21698	-0.485171	-1.75478	45	-2.21698	1.69921	0.187821	45	-2.21698	-3.15398	2.34305	45	-2.21698
46	-2.57497	-0.84372	-0.536783	46	-2.19596	0.414396	-0.768096	46	-2.19596	0.228412	-1.0542	46	-2.19596	1.89665	-0.1476	46	-2.19596	1.95911	0.315003	46	-2.19596	1.40278	0.183971	46	-2.19596	0.00855545	-1.13457	46	-2.19596	-0.247443	-1.53221	46	-2.19596	-0.435322	-1.6081	46	-2.19596	-0.466133	-1.75693	46	-2.19596	1.71673	0.185082	46	-2.19596	-3.12742	2.31669	46	-2.19596
47	-2.56238	-0.836895	-0.547364	47	-2.17495	0.428293	-0.770253	47	-2.17495	0.244873	-1.05415	47	-2.17495	1.91494	-0.147086	47	-2.17495	1.97517	0.315408	47	-2.17495	1.42003	0.184677	47	-2.17495	0.0272597	-1.13859	47	-2.17495	-0.228103	-1.53426	47	-2.17495	-0.416184	-1.61455	47	-2.17495	-0.446803	-1.75886	47	-2.17495	1.73452	0.182615	47	-2.17495	-3.10046	2.29053	47	-2.17495
48	-2.54979	-0.829936	-0.557858	48	-2.15393	0.442394	-0.772229	48	-2.15393	0.261575	-1.05382	48	-2.15393	1.93349	-0.146266	48	-2.15393	1.99146	0.316062	48	-2.15393	1.43754	0.185657	48	-2.15393	0.0462373	-1.14236	48	-2.15393	-0.208482	-1.53608	48	-2.15393	-0.396767	-1.62077	48	-2.15393	-0.427192	-1.76055	48	-2.15393	1.75256	0.180419	48	-2.15393	-3.07311	2.26458	48	-2.15393
49	-2.5372	-0.822846	-0.568264	49	-2.13292	0.456692	-0.774025	49	-2.13292	0.278509	-1.05323	49	-2.13292	1.95231	-0.145139	49	-2.13292	2.00797	0.316966	49	-2.13292	1.4553	0.186911	49	-2.13292	0.0654797	-1.14589	49	-2.13292	-0.188586	-1.53767	49	-2.13292	-0.377078	-1.62675	49	-2.13292	-0.407307	-1.76202	49	-2.13292	1.77086	0.178496	49	-2.13292	-3.04537	2.23885	49	-2.13292
50	-2.52461	-0.815626	-0.57858	50	-2.11191	0.47118	-0.775638	50	-2.11191	0.29567	-1.05237	50	-2.11191	1.97137	-0.143706	50	-2.11191	2.02471	0.318118	50	-2.11191	1.47329	0.188439	50	-2.11191	0.0849786	-1.14917	50	-2.11191	-0.168426	-1.53903	50	-2.11191	-0.357127	-1.6325	50	-2.11191	-0.387156	-1.76325	50	-2.11191	1.7894	0.176847	50	-2.11191	-3.01727	2.21335	50	-2.11191
51	-2.51201	-0.808276	-0.588803	51	-2.09089	0.485852	-0.77707	51	-2.09089	0.313049	-1.05123	51	-2.09089	1.99068	-0.141968	51	-2.09089	2.04166	0.319518	51	-2.09089	1.4915	0.19024	51	-2.09089	0.104725	-1.1522	51	-2.09089	-0.148009	-1.54015	51	-2.09089	-0.336923	-1.63802	51	-2.09089	-0.36675	-1.76426	51	-2.09089	1.80818	0.175472	51	-2.09089	-2.9888	2.1881	51	-2.09089
52	-2.49942	-0.800798	-0.598934	52	-2.06988	0.500702	-0.778318	52	-2.06988	0.330638	-1.04983	52	-2.06988	2.01022	-0.139924	52	-2.06988	2.05882	0.321166	52	-2.06988	1.50994	0.192314	52	-2.06988	0.124711	-1.15498	52	-2.06988	-0.127345	-1.54104	52	-2.06988	-0.316474	-1.64329	52	-2.06988	-0.346096	-1.76503	52	-2.06988	1.82718	0.174372	52	-2.06988	-2.96	2.1631	52	-2.06988
53	-2.48683	-0.793194	-0.60897	53	-2.04886	0.515723	-0.779383	53	-2.04886	0.348429	-1.04816	53	-2.04886	2.02998	-0.137577	53	-2.04886	2.07617	0.323061	53	-2.04886	1.52859	0.194658	53	-2.04886	0.144927	-1.15751	53	-2.04886	-0.106443	-1.5417	53	-2.04886	-0.295789	-1.64832	53	-2.04886	-0.325205	-1.76558	53	-2.04886	1.8464	0.173548	53	-2.04886	-2.93086	2.13836	53	-2.04886
54	-2.47424	-0.785463	-0.618909	54	-2.02785	0.530908	-0.780264	54	-2.02785	0.366416	-1.04622	54	-2.02785	2.04996	-0.134927	54	-2.02785	2.09372	0.325202	54	-2.02785	1.54745	0.197273	54	-2.02785	0.165365	-1.15979	54	-2.02785	-0.0853118	-1.54212	54	-2.02785	-0.274878	-1.6531	54	-2.02785	-0.304085	-1.76589	54	-2.02785	1.86584	0.173	54	-2.02785	-2.9014	2.1139	54	-2.02785
55	-2.46165	-0.777608	-0.628749	55	-2.00684	0.546251	-0.780961	55	-2.00684	0.384589	-1.04401	55	-2.00684	2.07015	-0.131976	55	-2.00684	2.11144	0.327588	55	-2.00684	1.5665	0.200158	55	-2.00684	0.186014	-1.16181	55	-2.00684	-0.0639613	-1.54231	55	-2.00684	-0.253749	-1.65764	55	-2.00684	-0.282745	-1.76598	55	-2.00684	1.88547	0.172728	55	-2.00684	-2.87163	2.08973	55	-2.00684
56	-2.44906	-0.76963	-0.638491	56	-1.98582	0.561745	-0.781473	56	-1.98582	0.402941	-1.04153	56	-1.98582	2.09054	-0.128725	56	-1.98582	2.12935	0.330218	56	-1.98582	1.58574	0.20331	56	-1.98582	0.206867	-1.16358	56	-1.98582	-0.0424007	-1.54226	56	-1.98582	-0.232413	-1.66192	56	-1.98582	-0.261196	-1.76583	56	-1.98582	1.9053	0.172733	56	-1.98582	-2.84158	2.06586	56	-1.98582
57	-2.43647	-0.761529	-0.648131	57	-1.96481	0.577383	-0.7818	57	-1.96481	0.421464	-1.0388	57	-1.96481	2.11111	-0.125174	57	-1.96481	2.14741	0.333091	57	-1.96481	1.60516	0.206728	57	-1.96481	0.227914	-1.16509	57	-1.96481	-0.0206396	-1.54198	57	-1.96481	-0.210878	-1.66596	57	-1.96481	-0.239446	-1.76545	57	-1.96481	1.92531	0.173013	57	-1.96481	-2.81124	2.0423	57	-1.96481
58	-2.42387	-0.753308	-0.657668	58	-1.94379	0.593159	-0.781941	58	-1.94379	0.44015	-1.03579	58	-1.94379	2.13187	-0.121326	58	-1.94379	2.16564	0.336206	58	-1.94379	1.62475	0.210412	58	-1.94379	0.249146	-1.16635	58	-1.94379	0.00131256	-1.54147	58	-1.94379	-0.189154	-1.66974	58	-1.94379	-0.217505	-1.76484	58	-1.94379	1.9455	0.17357	58	-1.94379	-2.78064	2.01905	58	-1.94379
59	-2.41128	-0.744968	-0.667101	59	-1.92278	0.609065	-0.781898	59	-1.92278	0.45899	-1.03253	59	-1.92278	2.1528	-0.117183	59	-1.92278	2.18401	0.33956	59	-1.92278	1.6445	0.214359	59	-1.92278	0.270552	-1.16735	59	-1.92278	0.0234459	-1.54072	59	-1.92278	-0.167251	-1.67327	59	-1.92278	-0.195383	-1.764	59	-1.92278	1.96586	0.174403	59	-1.92278	-2.74978	1.99614	59	-1.92278
60	-2.39869	-0.736509	-0.676428	60	-1.90177	0.625094	-0.781669	60	-1.90177	0.477975	-1.029	60	-1.90177	2.17389	-0.112746	60	-1.90177	2.20253	0.343154	60	-1.90177	1.6644	0.218568	60	-1.90177	0.292125	-1.16809	60	-1.90177	0.0457508	-1.53974	60	-1.90177	-0.145178	-1.67654	60	-1.90177	-0.173089	-1.76293	60	-1.90177	1.98637	0.175511	60	-1.90177	-2.71868	1.97356	60	-1.90177
61	-2.3861	-0.727933	-0.685648	61	-1.88075	0.641239	-0.781256	61	-1.88075	0.497099	-1.02521	61	-1.88075	2.19514	-0.108017	61	-1.88075	2.22119	0.346985	61	-1.88075	1.68445	0.223036	61	-1.88075	0.313854	-1.16858	61	-1.88075	0.0682173	-1.53852	61	-1.88075	-0.122945	-1.67956	61	-1.88075	-0.150634	-1.76162	61	-1.88075	2.00703	0.176894	61	-1.88075	-2.68736	1.95133	61	-1.88075
62	-2.37351	-0.719243	-0.694759	62	-1.85974	0.657493	-0.780658	62	-1.85974	0.516351	-1.02117	62	-1.85974	2.21652	-0.102998	62	-1.85974	2.23996	0.351051	62	-1.85974	1.70463	0.227762	62	-1.85974	0.33573	-1.16881	62	-1.85974	0.0908356	-1.53707	62	-1.85974	-0.100562	-1.68232	62	-1.85974	-0.128028	-1.76009	62	-1.85974	2.02784	0.178552	62	-1.85974	-2.65583	1.92947	62	-1.85974
63	-2.36092	-0.710438	-0.70376	63	-1.83872	0.673849	-0.779875	63	-1.83872	0.535724	-1.01686	63	-1.83872	2.23804	-0.0976923	63	-1.83872	2.25886	0.355351	63	-1.83872	1.72494	0.232744	63	-1.83872	0.357743	-1.16878	63	-1.83872	0.113596	-1.53539	63	-1.83872	-0.0780389	-1.68481	63	-1.83872	-0.105279	-1.75833	63	-1.83872	2.04877	0.180483	63	-1.83872	-2.6241	1.90797	63	-1.83872
64	-2.34832	-0.70152	-0.71265	64	-1.81771	0.6903	-0.778907	64	-1.81771	0.555209	-1.01231	64	-1.81771	2.25969	-0.0921011	64	-1.81771	2.27787	0.359883	64	-1.81771	1.74537	0.237979	64	-1.81771	0.379883	-1.16849	64	-1.81771	0.136487	-1.53348	64	-1.81771	-0.0553853	-1.68705	64	-1.81771	-0.0823995	-1.75635	64	-1.81771	2.06982	0.182687	64	-1.81771	-2.59219	1.88685	64	-1.81771
65	-2.33573	-0.692491	-0.721426	65	-1.7967	0.706838	-0.777756	65	-1.7967	0.574798	-1.0075	65	-1.7967	2.28145	-0.0862272	65	-1.7967	2.29697	0.364644	65	-1.7967	1.7659	0.243466	65	-1.7967	0.402141	-1.16795	65	-1.7967	0.1595	-1.53134	65	-1.7967	-0.0326114	-1.68902	65	-1.7967	-0.059398	-1.75413	65	-1.7967	2.09098	0.185164	65	-1.7967	-2.56011	1.86612	65	-1.7967
66	-2.32314	-0.683353	-0.730088	66	-1.77568	0.723456	-0.776422	66	-1.77568	0.594482	-1.00244	66	-1.77568	2.30332	-0.0800733	66	-1.77568	2.31617	0.369633	66	-1.77568	1.78654	0.249201	66	-1.77568	0.424507	-1.16714	66	-1.77568	0.182625	-1.52897	66	-1.77568	-0.00972726	-1.69073	66	-1.77568	-0.0362852	-1.7517	66	-1.77568	2.11225	0.187911	66	-1.77568	-2.52787	1.84578	66	-1.77568
67	-2.31055	-0.674106	-0.738635	67	-1.75467	0.740147	-0.774905	67	-1.75467	0.614251	-0.997134	67	-1.75467	2.32528	-0.073642	67	-1.75467	2.33546	0.374848	67	-1.75467	1.80726	0.255183	67	-1.75467	0.44697	-1.16608	67	-1.75467	0.205851	-1.52637	67	-1.75467	0.0132571	-1.69218	67	-1.75467	-0.0130713	-1.74903	67	-1.75467	2.13361	0.190927	67	-1.75467	-2.49549	1.82585	67	-1.75467
68	-2.29796	-0.664752	-0.747064	68	-1.73365	0.756903	-0.773206	68	-1.73365	0.634098	-0.991582	68	-1.73365	2.34733	-0.0669361	68	-1.73365	2.35482	0.380286	68	-1.73365	1.82807	0.261408	68	-1.73365	0.469522	-1.16477	68	-1.73365	0.229168	-1.52354	68	-1.73365	0.0363314	-1.69336	68	-1.73365	0.0102336	-1.74614	68	-1.73365	2.15506	0.194212	68	-1.73365	-2.46298	1.80634	68	-1.73365
69	-2.28537	-0.655293	-0.755375	69	-1.71264	0.773717	-0.771326	69	-1.71264	0.654014	-0.985787	69	-1.71264	2.36945	-0.0599587	69	-1.71264	2.37424	0.385944	69	-1.71264	1.84895	0.267874	69	-1.71264	0.492151	-1.1632	69	-1.71264	0.252565	-1.52049	69	-1.71264	0.0594855	-1.69428	69	-1.71264	0.0336191	-1.74303	69	-1.71264	2.17657	0.197764	69	-1.71264	-2.43036	1.78725	69	-1.71264
70	-2.27278	-0.64573	-0.763566	70	-1.69163	0.790582	-0.769265	70	-1.69163	0.67399	-0.979751	70	-1.69163	2.39164	-0.0527128	70	-1.69163	2.39373	0.391821	70	-1.69163	1.86989	0.274578	70	-1.69163	0.514849	-1.16137	70	-1.69163	0.276033	-1.51721	70	-1.69163	0.0827092	-1.69493	70	-1.69163	0.0570749	-1.7397	70	-1.69163	2.19816	0.20158	70	-1.69163	-2.39765	1.76859	70	-1.69163
71	-2.26018	-0.636065	-0.771636	71	-1.67061	0.80749	-0.767024	71	-1.67061	0.694016	-0.973477	71	-1.67061	2.41389	-0.0452017	71	-1.67061	2.41326	0.397914	71	-1.67061	1.89088	0.281517	71	-1.67061	0.537604	-1.15929	71	-1.67061	0.299561	-1.51371	71	-1.67061	0.105992	-1.69531	71	-1.67061	0.0805905	-1.73615	71	-1.67061	2.21979	0.205661	71	-1.67061	-2.36485	1.75037	71	-1.67061
72	-2.24759	-0.626298	-0.779583	72	-1.6496	0.824433	-0.764605	72	-1.6496	0.714085	-0.966968	72	-1.6496	2.43618	-0.0374285	72	-1.6496	2.43283	0.404219	72	-1.6496	1.91192	0.288688	72	-1.6496	0.560408	-1.15695	72	-1.6496	0.323138	-1.50999	72	-1.6496	0.129324	-1.69543	72	-1.6496	0.104156	-1.73238	72	-1.6496	2.24148	0.210003	72	-1.6496	-2.33198	1.73259	72	-1.6496
73	-2.235	-0.616433	-0.787407	73	-1.62858	0.841404	-0.762009	73	-1.62858	0.734187	-0.960226	73	-1.62858	2.45851	-0.0293969	73	-1.62858	2.45244	0.410735	73	-1.62858	1.93299	0.296088	73	-1.62858	0.583249	-1.15437	73	-1.62858	0.346755	-1.50605	73	-1.62858	0.152695	-1.69529	73	-1.62858	0.12776	-1.72839	73	-1.62858	2.2632	0.214605	73	-1.62858	-2.29906	1.71528	73	-1.62858
74	-2.22241	-0.60647	-0.795107	74	-1.60757	0.858397	-0.759236	74	-1.60757	0.754314	-0.953255	74	-1.60757	2.48087	-0.0211102	74	-1.60757	2.47207	0.417458	74	-1.60757	1.95409	0.303713	74	-1.60757	0.606118	-1.15153	74	-1.60757	0.3704	-1.50189	74	-1.60757	0.176095	-1.69488	74	-1.60757	0.151393	-1.72419	74	-1.60757	2.28494	0.219464	74	-1.60757	-2.26609	1.69842	74	-1.60757
75	-2.20982	-0.59641	-0.80268	75	-1.58656	0.875402	-0.756288	75	-1.58656	0.774456	-0.946058	75	-1.58656	2.50325	-0.0125723	75	-1.58656	2.49172	0.424386	75	-1.58656	1.97521	0.311561	75	-1.58656	0.629005	-1.14844	75	-1.58656	0.394063	-1.49751	75	-1.58656	0.199512	-1.6942	75	-1.58656	0.175045	-1.71978	75	-1.58656	2.30671	0.22458	75	-1.58656	-2.2331	1.68204	75	-1.58656
76	-2.19723	-0.586256	-0.810126	76	-1.56554	0.892413	-0.753167	76	-1.56554	0.794605	-0.938637	76	-1.56554	2.52563	-0.00378674	76	-1.56554	2.51137	0.431514	76	-1.56554	1.99633	0.319627	76	-1.56554	0.651899	-1.1451	76	-1.56554	0.417735	-1.49292	76	-1.56554	0.222937	-1.69326	76	-1.56554	0.198704	-1.71516	76	-1.56554	2.32848	0.229949	76	-1.56554	-2.2001	1.66614	76	-1.56554
77	-2.18463	-0.576009	-0.817443	77	-1.54453	0.909422	-0.749872	77	-1.54453	0.814751	-0.930997	77	-1.54453	2.54801	0.00524246	77	-1.54453	2.53102	0.438841	77	-1.54453	2.01745	0.327908	77	-1.54453	0.674791	-1.14151	77	-1.54453	0.441403	-1.48811	77	-1.54453	0.24636	-1.69205	77	-1.54453	0.22236	-1.71033	77	-1.54453	2.35024	0.235568	77	-1.54453	-2.16711	1.65072	77	-1.54453
78	-2.17204	-0.565671	-0.824631	78	-1.52351	0.926422	-0.746407	78	-1.52351	0.834887	-0.923141	78	-1.52351	2.57038	0.0145114	78	-1.52351	2.55066	0.446363	78	-1.52351	2.03856	0.336401	78	-1.52351	0.69767	-1.13768	78	-1.52351	0.465059	-1.4831	78	-1.52351	0.269769	-1.69058	78	-1.52351	0.246004	-1.70529	78	-1.52351	2.372	0.241437	78	-1.52351	-2.13413	1.63579	78	-1.52351
79	-2.15945	-0.555243	-0.831688	79	-1.5025	0.943405	-0.742773	79	-1.5025	0.855002	-0.915071	79	-1.5025	2.59273	0.0240158	79	-1.5025	2.57029	0.454076	79	-1.5025	2.05965	0.345102	79	-1.5025	0.720527	-1.13361	79	-1.5025	0.488691	-1.47787	79	-1.5025	0.293156	-1.68884	79	-1.5025	0.269624	-1.70004	79	-1.5025	2.39373	0.247551	79	-1.5025	-2.10118	1.62137	79	-1.5025
80	-2.14686	-0.544727	-0.838613	80	-1.48149	0.960363	-0.73897	80	-1.48149	0.875089	-0.906792	80	-1.48149	2.61504	0.0337517	80	-1.48149	2.58988	0.461978	80	-1.48149	2.08071	0.354006	80	-1.48149	0.74335	-1.12929	80	-1.48149	0.512289	-1.47244	80	-1.48149	0.316508	-1.68684	80	-1.48149	0.29321	-1.6946	80	-1.48149	2.41544	0.253908	80	-1.48149	-2.06828	1.60744	80	-1.48149
81	-2.13427	-0.534125	-0.845406	81	-1.46047	0.977289	-0.735002	81	-1.46047	0.895138	-0.898307	81	-1.46047	2.63731	0.0437147	81	-1.46047	2.60943	0.470064	81	-1.46047	2.10172	0.36311	81	-1.46047	0.766131	-1.12473	81	-1.46047	0.535843	-1.46681	81	-1.46047	0.339817	-1.68458	81	-1.46047	0.316752	-1.68895	81	-1.46047	2.4371	0.260506	81	-1.46047	-2.03545	1.59403	81	-1.46047
82	-2.12168	-0.523438	-0.852064	82	-1.43946	0.994177	-0.730868	82	-1.43946	0.91514	-0.889621	82	-1.43946	2.65953	0.0539004	82	-1.43946	2.62894	0.478332	82	-1.43946	2.12269	0.372411	82	-1.43946	0.788859	-1.11994	82	-1.43946	0.559342	-1.46098	82	-1.43946	0.363072	-1.68206	82	-1.43946	0.340239	-1.68311	82	-1.43946	2.45871	0.267342	82	-1.43946	-2.00269	1.58114	82	-1.43946
83	-2.10909	-0.512668	-0.858587	83	-1.41844	1.01102	-0.726573	83	-1.41844	0.935087	-0.880736	83	-1.41844	2.68169	0.0643043	83	-1.41844	2.6484	0.486777	83	-1.41844	2.1436	0.381903	83	-1.41844	0.811523	-1.11491	83	-1.41844	0.582776	-1.45494	83	-1.41844	0.386262	-1.67928	83	-1.41844	0.363661	-1.67708	83	-1.41844	2.48026	0.274412	83	-1.41844	-1.97002	1.56877	83	-1.41844
84	-2.09649	-0.501816	-0.864974	84	-1.39743	1.0278	-0.722116	84	-1.39743	0.954969	-0.871656	84	-1.39743	2.70378	0.0749218	84	-1.39743	2.66779	0.495395	84	-1.39743	2.16445	0.391583	84	-1.39743	0.834115	-1.10964	84	-1.39743	0.606134	-1.44872	84	-1.39743	0.409378	-1.67624	84	-1.39743	0.387007	-1.67085	84	-1.39743	2.50174	0.281713	84	-1.39743	-1.93745	1.55692	84	-1.39743
85	-2.0839	-0.490885	-0.871224	85	-1.37642	1.04453	-0.717501	85	-1.37642	0.974779	-0.862387	85	-1.37642	2.72578	0.0857482	85	-1.37642	2.68711	0.504184	85	-1.37642	2.18521	0.401446	85	-1.37642	0.856624	-1.10414	85	-1.37642	0.629407	-1.4423	85	-1.37642	0.432408	-1.67294	85	-1.37642	0.410268	-1.66443	85	-1.37642	2.52315	0.289243	85	-1.37642	-1.90501	1.54561	85	-1.37642
86	-2.07131	-0.479877	-0.877336	86	-1.3554	1.06118	-0.71273	86	-1.3554	0.994506	-0.852931	86	-1.3554	2.7477	0.0967788	86	-1.3554	2.70636	0.513139	86	-1.3554	2.20589	0.411488	86	-1.3554	0.87904	-1.09842	86	-1.3554	0.652584	-1.43568	86	-1.3554	0.455344	-1.66939	86	-1.3554	0.433433	-1.65783	86	-1.3554	2.54446	0.296997	86	-1.3554	-1.8727	1.53484	86	-1.3554
87	-2.05872	-0.468792	-0.883309	87	-1.33439	1.07776	-0.707803	87	-1.33439	1.01414	-0.843294	87	-1.33439	2.76951	0.108009	87	-1.33439	2.72551	0.522256	87	-1.33439	2.22648	0.421705	87	-1.33439	0.901353	-1.09246	87	-1.33439	0.675654	-1.42889	87	-1.33439	0.478174	-1.66558	87	-1.33439	0.456491	-1.65104	87	-1.33439	2.56568	0.304973	87	-1.33439	-1.84054	1.52461	87	-1.33439
88	-2.04613	-0.457633	-0.889141	88	-1.31337	1.09426	-0.702724	88	-1.31337	1.03368	-0.833478	88	-1.31337	2.79122	0.119433	88	-1.31337	2.74457	0.531531	88	-1.31337	2.24696	0.432092	88	-1.31337	0.923553	-1.08629	88	-1.31337	0.698608	-1.4219	88	-1.31337	0.500889	-1.66152	88	-1.31337	0.479433	-1.64407	88	-1.31337	2.58679	0.313167	88	-1.31337	-1.80854	1.51493	88	-1.31337
89	-2.03354	-0.446401	-0.894833	89	-1.29236	1.11066	-0.697495	89	-1.29236	1.05311	-0.82349	89	-1.29236	2.8128	0.131046	89	-1.29236	2.76352	0.540959	89	-1.29236	2.26733	0.442644	89	-1.29236	0.945631	-1.07989	89	-1.29236	0.721435	-1.41474	89	-1.29236	0.523479	-1.65721	89	-1.29236	0.502248	-1.63693	89	-1.29236	2.60778	0.321574	89	-1.29236	-1.77672	1.5058	89	-1.29236
90	-2.02094	-0.435099	-0.900383	90	-1.27135	1.12697	-0.692119	90	-1.27135	1.07243	-0.813332	90	-1.27135	2.83426	0.142844	90	-1.27135	2.78236	0.550538	90	-1.27135	2.28758	0.453357	90	-1.27135	0.967576	-1.07327	90	-1.27135	0.744125	-1.4074	90	-1.27135	0.545933	-1.65265	90	-1.27135	0.524927	-1.62961	90	-1.27135	2.62865	0.330193	90	-1.27135	-1.74508	1.49723	90	-1.27135
91	-2.00835	-0.423727	-0.90579	91	-1.25033	1.14317	-0.686596	91	-1.25033	1.09161	-0.80301	91	-1.25033	2.85558	0.15482	91	-1.25033	2.80108	0.560263	91	-1.25033	2.3077	0.464226	91	-1.25033	0.98938	-1.06644	91	-1.25033	0.766669	-1.39988	91	-1.25033	0.568242	-1.64784	91	-1.25033	0.547459	-1.62212	91	-1.25033	2.64938	0.339018	91	-1.25033	-1.71365	1.48921	91	-1.25033
92	-1.99576	-0.412289	-0.911053	92	-1.22932	1.15926	-0.680931	92	-1.22932	1.11067	-0.792527	92	-1.22932	2.87674	0.16697	92	-1.22932	2.81966	0.570128	92	-1.22932	2.32767	0.475247	92	-1.22932	1.01103	-1.05939	92	-1.22932	0.789056	-1.39219	92	-1.22932	0.590396	-1.64279	92	-1.22932	0.569835	-1.61446	92	-1.22932	2.66997	0.348046	92	-1.22932	-1.68245	1.48176	92	-1.22932
93	-1.98317	-0.400785	-0.916172	93	-1.2083	1.17522	-0.675125	93	-1.2083	1.12958	-0.78189	93	-1.2083	2.89776	0.179289	93	-1.2083	2.83811	0.580131	93	-1.2083	2.3475	0.486414	93	-1.2083	1.03252	-1.05214	93	-1.2083	0.811276	-1.38434	93	-1.2083	0.612386	-1.6375	93	-1.2083	0.592044	-1.60664	93	-1.2083	2.69041	0.357273	93	-1.2083	-1.65147	1.47488	93	-1.2083
94	-1.97058	-0.389217	-0.921146	94	-1.18729	1.19107	-0.669181	94	-1.18729	1.14835	-0.771102	94	-1.18729	2.9186	0.19177	94	-1.18729	2.85641	0.590266	94	-1.18729	2.36717	0.497722	94	-1.18729	1.05384	-1.04468	94	-1.18729	0.83332	-1.37632	94	-1.18729	0.6342	-1.63196	94	-1.18729	0.614076	-1.59865	94	-1.18729	2.71068	0.366695	94	-1.18729	-1.62074	1.46856	94	-1.18729
95	-1.95799	-0.377588	-0.925974	95	-1.16628	1.20677	-0.663102	95	-1.16628	1.16695	-0.760168	95	-1.16628	2.93927	0.204408	95	-1.16628	2.87456	0.600529	95	-1.16628	2.38667	0.509167	95	-1.16628	1.07498	-1.03702	95	-1.16628	0.855178	-1.36814	95	-1.16628	0.655831	-1.62619	95	-1.16628	0.635923	-1.59051	95	-1.16628	2.73078	0.376307	95	-1.16628	-1.59026	1.46282	95	-1.16628
96	-1.9454	-0.365899	-0.930655	96	-1.14526	1.22234	-0.65689	96	-1.14526	1.18539	-0.749093	96	-1.14526	2.95975	0.217199	96	-1.14526	2.89255	0.610916	96	-1.14526	2.406	0.520743	96	-1.14526	1.09593	-1.02915	96	-1.14526	0.87684	-1.3598	96	-1.14526	0.677268	-1.62018	96	-1.14526	0.657574	-1.58222	96	-1.14526	2.7507	0.386106	96	-1.14526	-1.56007	1.45766	96	-1.14526
97	-1.9328	-0.354152	-0.935188	97	-1.12425	1.23776	-0.650548	97	-1.12425	1.20365	-0.737882	97	-1.12425	2.98004	0.230135	97	-1.12425	2.91036	0.621421	97	-1.12425	2.42515	0.532446	97	-1.12425	1.11669	-1.02109	97	-1.12425	0.898296	-1.3513	97	-1.12425	0.698501	-1.61394	97	-1.12425	0.67902	-1.57377	97	-1.12425	2.77044	0.396087	97	-1.12425	-1.53015	1.45307	97	-1.12425
98	-1.92021	-0.342349	-0.939573	98	-1.10323	1.25303	-0.644079	98	-1.10323	1.22174	-0.72654	98	-1.10323	3.00013	0.243212	98	-1.10323	2.928	0.632041	98	-1.10323	2.4441	0.54427	98	-1.10323	1.13723	-1.01284	98	-1.10323	0.919538	-1.34266	98	-1.10323	0.719522	-1.60747	98	-1.10323	0.700251	-1.56518	98	-1.10323	2.78997	0.406246	98	-1.10323	-1.50054	1.44906	98	-1.10323
99	-1.90762	-0.330491	-0.943809	99	-1.08222	1.26813	-0.637486	99	-1.08222	1.23963	-0.715071	99	-1.08222	3.02	0.256423	99	-1.08222	2.94545	0.642771	99	-1.08222	2.46286	0.55621	99	-1.08222	1.15756	-1.0044	99	-1.08222	0.940556	-1.33387	99	-1.08222	0.740321	-1.60077	99	-1.08222	0.721258	-1.55645	99	-1.08222	2.8093	0.416577	99	-1.08222	-1.47124	1.44563	99	-1.08222
100	-1.89503	-0.318581	-0.947896	100	-1.06121	1.28307	-0.630771	100	-1.06121	1.25732	-0.703482	100	-1.06121	3.03965	0.269763	100	-1.06121	2.9627	0.653605	100	-1.06121	2.48141	0.56826	100	-1.06121	1.17766	-0.995775	100	-1.06121	0.96134	-1.32494	100	-1.06121	0.760889	-1.59385	100	-1.06121	0.742031	-1.54758	100	-1.06121	2.82842	0.427078	100	-1.06121	-1.44226	1.44278	100	-1.06121
101	-1.88244	-0.306621	-0.951832	101	-1.04019	1.29783	-0.623938	101	-1.04019	1.2748	-0.691776	101	-1.04019	3.05908	0.283227	101	-1.04019	2.97976	0.66454	101	-1.04019	2.49974	0.580416	101	-1.04019	1.19753	-0.986968	101	-1.04019	0.981882	-1.31587	101	-1.04019	0.781217	-1.58671	101	-1.04019	0.762562	-1.53857	101	-1.04019	2.84731	0.437742	101	-1.04019	-1.41363	1.44052	101	-1.04019
102	-1.86985	-0.294612	-0.955617	102	-1.01918	1.31241	-0.61699	102	-1.01918	1.29207	-0.67996	102	-1.01918	3.07826	0.296806	102	-1.01918	2.9966	0.675569	102	-1.01918	2.51784	0.592672	102	-1.01918	1.21715	-0.977983	102	-1.01918	1.00217	-1.30667	102	-1.01918	0.801296	-1.57935	102	-1.01918	0.782842	-1.52944	102	-1.01918	2.86597	0.448565	102	-1.01918	-1.38534	1.43884	102	-1.01918
103	-1.85725	-0.282556	-0.959251	103	-0.998165	1.3268	-0.609929	103	-0.998165	1.30912	-0.668038	103	-0.998165	3.0972	0.310497	103	-0.998165	3.01323	0.68669	103	-0.998165	2.53571	0.605022	103	-0.998165	1.23652	-0.968825	103	-0.998165	1.0222	-1.29733	103	-0.998165	0.821117	-1.57178	103	-0.998165	0.802861	-1.52017	103	-0.998165	2.88439	0.459543	103	-0.998165	-1.35742	1.43775	103	-0.998165
104	-1.84466	-0.270456	-0.962732	104	-0.977151	1.341	-0.602759	104	-0.977151	1.32594	-0.656016	104	-0.977151	3.11589	0.324293	104	-0.977151	3.02964	0.697895	104	-0.977151	2.55335	0.617462	104	-0.977151	1.25564	-0.959498	104	-0.977151	1.04196	-1.28787	104	-0.977151	0.840671	-1.56399	104	-0.977151	0.82261	-1.51079	104	-0.977151	2.90256	0.470671	104	-0.977151	-1.32987	1.43724	104	-0.977151
105	-1.83207	-0.258312	-0.966061	105	-0.956137	1.355	-0.595483	105	-0.956137	1.34252	-0.643899	105	-0.956137	3.13431	0.338188	105	-0.956137	3.04581	0.709181	105	-0.956137	2.57073	0.629985	105	-0.956137	1.27448	-0.950005	105	-0.956137	1.06144	-1.27829	105	-0.956137	0.85995	-1.556	105	-0.956137	0.842082	-1.50128	105	-0.956137	2.92048	0.481943	105	-0.956137	-1.30271	1.43732	105	-0.956137
106	-1.81948	-0.246128	-0.969237	106	-0.935123	1.3688	-0.588104	106	-0.935123	1.35886	-0.631692	106	-0.935123	3.15246	0.352175	106	-0.935123	3.06175	0.720543	106	-0.935123	2.58786	0.642586	106	-0.935123	1.29304	-0.940351	106	-0.935123	1.08064	-1.26859	106	-0.935123	0.878945	-1.5478	106	-0.935123	0.861266	-1.49166	106	-0.935123	2.93813	0.493355	106	-0.935123	-1.27595	1.43799	106	-0.935123
107	-1.80689	-0.233904	-0.97226	107	-0.914109	1.38238	-0.580626	107	-0.914109	1.37495	-0.619401	107	-0.914109	3.17033	0.366249	107	-0.914109	3.07744	0.731975	107	-0.914109	2.60472	0.65526	107	-0.914109	1.31132	-0.93054	107	-0.914109	1.09954	-1.25877	107	-0.914109	0.897648	-1.5394	107	-0.914109	0.880156	-1.48194	107	-0.914109	2.95551	0.504902	107	-0.914109	-1.24961	1.43924	107	-0.914109
108	-1.7943	-0.221644	-0.975128	108	-0.893095	1.39574	-0.573051	108	-0.893095	1.39078	-0.60703	108	-0.893095	3.18791	0.380403	108	-0.893095	3.09288	0.743473	108	-0.893095	2.62131	0.668	108	-0.893095	1.32931	-0.920577	108	-0.893095	1.11813	-1.24885	108	-0.893095	0.91605	-1.5308	108	-0.893095	0.898742	-1.4721	108	-0.893095	2.97261	0.516579	108	-0.893095	-1.22368	1.44108	108	-0.893095
109	-1.7817	-0.209348	-0.977841	109	-0.872081	1.40888	-0.565384	109	-0.872081	1.40634	-0.594587	109	-0.872081	3.2052	0.394631	109	-0.872081	3.10806	0.755031	109	-0.872081	2.63763	0.680802	109	-0.872081	1.34699	-0.910465	109	-0.872081	1.13641	-1.23882	109	-0.872081	0.934143	-1.52201	109	-0.872081	0.917016	-1.46216	109	-0.872081	2.98943	0.52838	109	-0.872081	-1.19819	1.4435	109	-0.872081
110	-1.76911	-0.19702	-0.9804	110	-0.851067	1.42179	-0.557627	110	-0.851067	1.42163	-0.582076	110	-0.851067	3.22219	0.408927	110	-0.851067	3.12297	0.766644	110	-0.851067	2.65366	0.69366	110	-0.851067	1.36436	-0.90021	110	-0.851067	1.15438	-1.2287	110	-0.851067	0.95192	-1.51304	110	-0.851067	0.934971	-1.45213	110	-0.851067	3.00595	0.5403	110	-0.851067	-1.17315	1.4465	110	-0.851067
111	-1.75652	-0.18466	-0.982803	111	-0.830053	1.43446	-0.549784	111	-0.830053	1.43664	-0.569502	111	-0.830053	3.23886	0.423284	111	-0.830053	3.13762	0.778308	111	-0.830053	2.6694	0.706568	111	-0.830053	1.38142	-0.889816	111	-0.830053	1.17201	-1.21847	111	-0.830053	0.969372	-1.50387	111	-0.830053	0.952597	-1.44201	111	-0.830053	3.02217	0.552334	111	-0.830053	-1.14856	1.45009	111	-0.830053
112	-1.74393	-0.17227	-0.98505	112	-0.809039	1.44689	-0.541858	112	-0.809039	1.45137	-0.556871	112	-0.809039	3.25522	0.437697	112	-0.809039	3.15198	0.790017	112	-0.809039	2.68483	0.71952	112	-0.809039	1.39815	-0.879287	112	-0.809039	1.18931	-1.20816	112	-0.809039	0.986493	-1.49453	112	-0.809039	0.969889	-1.43179	112	-0.809039	3.03808	0.564476	112	-0.809039	-1.12445	1.45426	112	-0.809039
113	-1.73134	-0.159854	-0.987141	113	-0.788025	1.45908	-0.533853	113	-0.788025	1.4658	-0.544189	113	-0.788025	3.27126	0.452158	113	-0.788025	3.16606	0.801765	113	-0.788025	2.69996	0.73251	113	-0.788025	1.41455	-0.868628	113	-0.788025	1.20627	-1.19775	113	-0.788025	1.00327	-1.48501	113	-0.788025	0.986837	-1.42149	113	-0.788025	3.05367	0.576722	113	-0.788025	-1.10081	1.45901	113	-0.788025
114	-1.71875	-0.147412	-0.989075	114	-0.767011	1.47101	-0.525773	114	-0.767011	1.47994	-0.531462	114	-0.767011	3.28696	0.466661	114	-0.767011	3.17984	0.813548	114	-0.767011	2.71478	0.745533	114	-0.767011	1.43061	-0.857844	114	-0.767011	1.22288	-1.18727	114	-0.767011	1.01971	-1.47531	114	-0.767011	1.00343	-1.41112	114	-0.767011	3.06894	0.589066	114	-0.767011	-1.07766	1.46433	114	-0.767011
115	-1.70616	-0.134946	-0.990853	115	-0.745997	1.48269	-0.51762	115	-0.745997	1.49377	-0.518694	115	-0.745997	3.30232	0.481201	115	-0.745997	3.19333	0.825361	115	-0.745997	2.72928	0.758584	115	-0.745997	1.44633	-0.84694	115	-0.745997	1.23912	-1.17671	115	-0.745997	1.03579	-1.46545	115	-0.745997	1.01967	-1.40067	115	-0.745997	3.08389	0.601503	115	-0.745997	-1.055	1.47023	115	-0.745997
116	-1.69356	-0.122459	-0.992474	116	-0.724983	1.4941	-0.509399	116	-0.724983	1.50728	-0.505892	116	-0.724983	3.31734	0.495769	116	-0.724983	3.20652	0.837198	116	-0.724983	2.74345	0.771655	116	-0.724983	1.46169	-0.83592	116	-0.724983	1.25501	-1.16607	116	-0.724983	1.0515	-1.45542	116	-0.724983	1.03555	-1.39015	116	-0.724983	3.09849	0.614026	116	-0.724983	-1.03286	1.4767	116	-0.724983
117	-1.68097	-0.109953	-0.993937	117	-0.703969	1.50525	-0.501113	117	-0.703969	1.52049	-0.493062	117	-0.703969	3.33201	0.510361	117	-0.703969	3.2194	0.849053	117	-0.703969	2.75729	0.784742	117	-0.703969	1.47669	-0.824789	117	-0.703969	1.27052	-1.15537	117	-0.703969	1.06685	-1.44523	117	-0.703969	1.05105	-1.37956	117	-0.703969	3.11276	0.626631	117	-0.703969	-1.01124	1.48374	117	-0.703969
118	-1.66838	-0.0974297	-0.995242	118	-0.682955	1.51612	-0.492767	118	-0.682955	1.53337	-0.480208	118	-0.682955	3.34631	0.52497	118	-0.682955	3.23196	0.860923	118	-0.682955	2.77079	0.797839	118	-0.682955	1.49133	-0.813553	118	-0.682955	1.28565	-1.1446	118	-0.682955	1.08182	-1.43489	118	-0.682955	1.06617	-1.36891	118	-0.682955	3.12667	0.639311	118	-0.682955	-0.990146	1.49134	118	-0.682955
119	-1.65579	-0.0848907	-0.99639	119	-0.661941	1.52672	-0.484362	119	-0.661941	1.54592	-0.467337	119	-0.661941	3.36026	0.539589	119	-0.661941	3.2442	0.872801	119	-0.661941	2.78395	0.81094	119	-0.661941	1.50559	-0.802215	119	-0.661941	1.30039	-1.13378	119	-0.661941	1.09642	-1.42439	119	-0.661941	1.08091	-1.35821	119	-0.661941	3.14023	0.652062	119	-0.661941	-0.96959	1.49951	119	-0.661941
120	-1.6432	-0.0723382	-0.99738	120	-0.640927	1.53703	-0.475904	120	-0.640927	1.55813	-0.454454	120	-0.640927	3.37383	0.554211	120	-0.640927	3.25612	0.884683	120	-0.640927	2.79676	0.824039	120	-0.640927	1.51947	-0.790782	120	-0.640927	1.31475	-1.1229	120	-0.640927	1.11062	-1.41375	120	-0.640927	1.09526	-1.34746	120	-0.640927	3.15343	0.664878	120	-0.640927	-0.949581	1.50823	120	-0.640927
121	-1.63061	-0.0597742	-0.998212	121	-0.619913	1.54706	-0.467396	121	-0.619913	1.57001	-0.441565	121	-0.619913	3.38702	0.568831	121	-0.619913	3.2677	0.896562	121	-0.619913	2.80921	0.837131	121	-0.619913	1.53296	-0.779258	121	-0.619913	1.3287	-1.11197	121	-0.619913	1.12443	-1.40297	121	-0.619913	1.1092	-1.33666	121	-0.619913	3.16627	0.677752	121	-0.619913	-0.930128	1.51751	121	-0.619913
122	-1.61801	-0.0472008	-0.998885	122	-0.598899	1.5568	-0.458842	122	-0.598899	1.58154	-0.428676	122	-0.598899	3.39983	0.583442	122	-0.598899	3.27895	0.908434	122	-0.598899	2.8213	0.850209	122	-0.598899	1.54607	-0.767648	122	-0.598899	1.34225	-1.101	122	-0.598899	1.13784	-1.39206	122	-0.598899	1.12275	-1.32582	122	-0.598899	3.17873	0.69068	122	-0.598899	-0.911239	1.52734	122	-0.598899
123	-1.60542	-0.0346199	-0.999401	123	-0.577885	1.56624	-0.450245	123	-0.577885	1.59273	-0.415792	123	-0.577885	3.41226	0.598037	123	-0.577885	3.28986	0.920294	123	-0.577885	2.83303	0.863268	123	-0.577885	1.55878	-0.755958	123	-0.577885	1.35539	-1.08999	123	-0.577885	1.15084	-1.38101	123	-0.577885	1.13588	-1.31494	123	-0.577885	3.19081	0.703655	123	-0.577885	-0.892923	1.53772	123	-0.577885
124	-1.59283	-0.0220334	-0.999757	124	-0.556871	1.57538	-0.441609	124	-0.556871	1.60356	-0.402919	124	-0.556871	3.42429	0.61261	124	-0.556871	3.30042	0.932136	124	-0.556871	2.84438	0.876302	124	-0.556871	1.57108	-0.744192	124	-0.556871	1.36811	-1.07894	124	-0.556871	1.16343	-1.36983	124	-0.556871	1.14859	-1.30403	124	-0.556871	3.20251	0.716672	124	-0.556871	-0.875188	1.54864	124	-0.556871
125	-1.58024	-0.00944353	-0.999955	125	-0.535857	1.58422	-0.432939	125	-0.535857	1.61403	-0.390063	125	-0.535857	3.43592	0.627154	125	-0.535857	3.31064	0.943956	125	-0.535857	2.85535	0.889305	125	-0.535857	1.58298	-0.732356	125	-0.535857	1.38041	-1.06786	125	-0.535857	1.1756	-1.35853	125	-0.535857	1.16089	-1.29309	125	-0.535857	3.21382	0.729726	125	-0.535857	-0.858041	1.5601	125	-0.535857
126	-1.56765	0.00314788	-0.999995	126	-0.514843	1.59275	-0.424237	126	-0.514843	1.62413	-0.37723	126	-0.514843	3.44714	0.641664	126	-0.514843	3.32049	0.955747	126	-0.514843	2.86595	0.902272	126	-0.514843	1.59446	-0.720454	126	-0.514843	1.39228	-1.05676	126	-0.514843	1.18735	-1.34711	126	-0.514843	1.17275	-1.28213	126	-0.514843	3.22474	0.742809	126	-0.514843	-0.841491	1.57208	126	-0.514843
127	-1.55506	0.0157388	-0.999876	127	-0.493829	1.60097	-0.415509	127	-0.493829	1.63387	-0.364424	127	-0.493829	3.45796	0.656132	127	-0.493829	3.32999	0.967505	127	-0.493829	2.87615	0.915197	127	-0.493829	1.60552	-0.708494	127	-0.493829	1.40372	-1.04564	127	-0.493829	1.19867	-1.33558	127	-0.493829	1.18418	-1.27115	127	-0.493829	3.23526	0.755917	127	-0.493829	-0.825544	1.5846	127	-0.493829
128	-1.54247	0.0283272	-0.999599	128	-0.472815	1.60888	-0.406757	128	-0.472815	1.64323	-0.351652	128	-0.472815	3.46836	0.670553	128	-0.472815	3.33912	0.979224	128	-0.472815	2.88597	0.928074	128	-0.472815	1.61616	-0.696478	128	-0.472815	1.41472	-1.03451	128	-0.472815	1.20955	-1.32395	128	-0.472815	1.19518	-1.26016	128	-0.472815	3.24538	0.769044	128	-0.472815	-0.810208	1.59763	128	-0.472815
129	-1.52987	0.0409111	-0.999163	129	-0.451801	1.61647	-0.397985	129	-0.451801	1.65222	-0.33892	129	-0.451801	3.47834	0.684919	129	-0.451801	3.34789	0.9909	129	-0.451801	2.89539	0.940898	129	-0.451801	1.62637	-0.684414	129	-0.451801	1.42528	-1.02336	129	-0.451801	1.22	-1.31221	129	-0.451801	1.20573	-1.24917	129	-0.451801	3.25509	0.782184	129	-0.451801	-0.795489	1.61119	129	-0.451801
130	-1.51728	0.0534886	-0.998568	130	-0.430787	1.62373	-0.389198	130	-0.430787	1.66082	-0.326232	130	-0.430787	3.4879	0.699225	130	-0.430787	3.35628	1.00253	130	-0.430787	2.90441	0.953662	130	-0.430787	1.63615	-0.672305	130	-0.430787	1.43539	-1.01221	130	-0.430787	1.23001	-1.30038	130	-0.430787	1.21584	-1.23817	130	-0.430787	3.26439	0.795331	130	-0.430787	-0.781394	1.62525	130	-0.430787
131	-1.50469	0.0660575	-0.997816	131	-0.409773	1.63067	-0.380399	131	-0.409773	1.66904	-0.313595	131	-0.409773	3.49704	0.713464	131	-0.409773	3.3643	1.0141	131	-0.409773	2.91303	0.966361	131	-0.409773	1.64549	-0.660158	131	-0.409773	1.44505	-1.00106	131	-0.409773	1.23957	-1.28845	131	-0.409773	1.22549	-1.22717	131	-0.409773	3.27327	0.80848	131	-0.409773	-0.767929	1.63981	131	-0.409773
132	-1.4921	0.078616	-0.996905	132	-0.388759	1.63729	-0.371593	132	-0.388759	1.67688	-0.301015	132	-0.388759	3.50574	0.72763	132	-0.388759	3.37194	1.02561	132	-0.388759	2.92124	0.97899	132	-0.388759	1.65439	-0.647978	132	-0.388759	1.45425	-0.989909	132	-0.388759	1.24867	-1.27644	132	-0.388759	1.23469	-1.21617	132	-0.388759	3.28173	0.821623	132	-0.388759	-0.755101	1.65487	132	-0.388759
133	-1.47951	0.091162	-0.995836	133	-0.367745	1.64357	-0.362782	133	-0.367745	1.68432	-0.288496	133	-0.367745	3.514	0.741717	133	-0.367745	3.3792	1.03706	133	-0.367745	2.92904	0.991543	133	-0.367745	1.66285	-0.63577	133	-0.367745	1.46299	-0.978772	133	-0.367745	1.25732	-1.26435	133	-0.367745	1.24343	-1.20519	133	-0.367745	3.28977	0.834757	133	-0.367745	-0.742914	1.67042	133	-0.367745
134	-1.46692	0.103694	-0.994609	134	-0.346731	1.64952	-0.353972	134	-0.346731	1.69136	-0.276044	134	-0.346731	3.52183	0.755718	134	-0.346731	3.38607	1.04844	134	-0.346731	2.93643	1.00401	134	-0.346731	1.67085	-0.62354	134	-0.346731	1.47127	-0.967649	134	-0.346731	1.26551	-1.25218	134	-0.346731	1.2517	-1.19423	134	-0.346731	3.29738	0.847875	134	-0.346731	-0.731374	1.68646	134	-0.346731
135	-1.45432	0.116209	-0.993225	135	-0.325717	1.65513	-0.345165	135	-0.325717	1.69801	-0.263665	135	-0.325717	3.52922	0.769628	135	-0.325717	3.39256	1.05975	135	-0.325717	2.9434	1.0164	135	-0.325717	1.67841	-0.611293	135	-0.325717	1.47908	-0.956545	135	-0.325717	1.27324	-1.23995	135	-0.325717	1.2595	-1.18329	135	-0.325717	3.30457	0.860971	135	-0.325717	-0.720486	1.70297	135	-0.325717
136	-1.44173	0.128705	-0.991683	136	-0.304703	1.6604	-0.336366	136	-0.304703	1.70426	-0.251364	136	-0.304703	3.53616	0.78344	136	-0.304703	3.39865	1.07098	136	-0.304703	2.94995	1.02869	136	-0.304703	1.6855	-0.599034	136	-0.304703	1.48642	-0.945466	136	-0.304703	1.28051	-1.22764	136	-0.304703	1.26684	-1.17237	136	-0.304703	3.31132	0.874039	136	-0.304703	-0.710255	1.71995	136	-0.304703
137	-1.42914	0.141182	-0.989984	137	-0.283689	1.66533	-0.327578	137	-0.283689	1.7101	-0.239147	137	-0.283689	3.54265	0.797148	137	-0.283689	3.40435	1.08212	137	-0.283689	2.95607	1.04088	137	-0.283689	1.69214	-0.58677	137	-0.283689	1.49328	-0.934416	137	-0.283689	1.2873	-1.21528	137	-0.283689	1.2737	-1.16149	137	-0.283689	3.31763	0.887074	137	-0.283689	-0.700686	1.73739	137	-0.283689
138	-1.41655	0.153636	-0.988128	138	-0.262675	1.66992	-0.318806	138	-0.262675	1.71554	-0.227019	138	-0.262675	3.54869	0.810746	138	-0.262675	3.40965	1.09317	138	-0.262675	2.96177	1.05298	138	-0.262675	1.69832	-0.574504	138	-0.262675	1.49967	-0.9234	138	-0.262675	1.29362	-1.20287	138	-0.262675	1.28008	-1.15064	138	-0.262675	3.3235	0.900069	138	-0.262675	-0.691783	1.75528	138	-0.262675
139	-1.40396	0.166065	-0.986115	139	-0.241661	1.67417	-0.310054	139	-0.241661	1.72056	-0.214986	139	-0.241661	3.55427	0.824227	139	-0.241661	3.41455	1.10413	139	-0.241661	2.96704	1.06496	139	-0.241661	1.70403	-0.562243	139	-0.241661	1.50557	-0.912422	139	-0.241661	1.29946	-1.1904	139	-0.241661	1.28599	-1.13983	139	-0.241661	3.32893	0.91302	139	-0.241661	-0.683549	1.77363	139	-0.241661
140	-1.39137	0.178468	-0.983946	140	-0.220647	1.67807	-0.301324	140	-0.220647	1.72518	-0.203052	140	-0.220647	3.5594	0.837587	140	-0.220647	3.41906	1.11499	140	-0.220647	2.97188	1.07682	140	-0.220647	1.70928	-0.549992	140	-0.220647	1.511	-0.901489	140	-0.220647	1.30483	-1.1779	140	-0.220647	1.29141	-1.12906	140	-0.220647	3.33392	0.92592	140	-0.220647	-0.675989	1.7924	140	-0.220647
141	-1.37878	0.190843	-0.981621	141	-0.199633	1.68161	-0.292622	141	-0.199633	1.72938	-0.191223	141	-0.199633	3.56407	0.850819	141	-0.199633	3.42316	1.12575	141	-0.199633	2.97629	1.08857	141	-0.199633	1.71405	-0.537757	141	-0.199633	1.51594	-0.890605	141	-0.199633	1.30972	-1.16535	141	-0.199633	1.29634	-1.11835	141	-0.199633	3.33846	0.938764	141	-0.199633	-0.669105	1.81161	141	-0.199633
142	-1.36618	0.203188	-0.97914	142	-0.178619	1.68481	-0.28395	142	-0.178619	1.73317	-0.179504	142	-0.178619	3.56828	0.863918	142	-0.178619	3.42685	1.1364	142	-0.178619	2.98026	1.1002	142	-0.178619	1.71836	-0.525543	142	-0.178619	1.52039	-0.879773	142	-0.178619	1.31412	-1.15278	142	-0.178619	1.30079	-1.10769	142	-0.178619	3.34255	0.951546	142	-0.178619	-0.662901	1.83124	142	-0.178619
143	-1.35359	0.2155	-0.976504	143	-0.157605	1.68766	-0.275314	143	-0.157605	1.73654	-0.167901	143	-0.157605	3.57202	0.876877	143	-0.157605	3.43014	1.14693	143	-0.157605	2.98379	1.11169	143	-0.157605	1.72219	-0.513355	143	-0.157605	1.52435	-0.869	143	-0.157605	1.31804	-1.14017	143	-0.157605	1.30475	-1.09709	143	-0.157605	3.3462	0.96426	143	-0.157605	-0.657379	1.85128	143	-0.157605
144	-1.341	0.227779	-0.973713	144	-0.136591	1.69015	-0.266715	144	-0.136591	1.7395	-0.156418	144	-0.136591	3.5753	0.88969	144	-0.136591	3.43302	1.15735	144	-0.136591	2.98689	1.12305	144	-0.136591	1.72554	-0.501198	144	-0.136591	1.52782	-0.85829	144	-0.136591	1.32147	-1.12755	144	-0.136591	1.30822	-1.08656	144	-0.136591	3.34939	0.976901	144	-0.136591	-0.652542	1.87173	144	-0.136591
145	-1.32841	0.240021	-0.970768	145	-0.115577	1.69229	-0.25816	145	-0.115577	1.74203	-0.145061	145	-0.115577	3.57812	0.902353	145	-0.115577	3.43549	1.16764	145	-0.115577	2.98954	1.13427	145	-0.115577	1.72842	-0.489079	145	-0.115577	1.53079	-0.847648	145	-0.115577	1.32442	-1.11491	145	-0.115577	1.31119	-1.07609	145	-0.115577	3.35213	0.989463	145	-0.115577	-0.648392	1.89256	145	-0.115577
146	-1.31582	0.252225	-0.967669	146	-0.094563	1.69408	-0.24965	146	-0.094563	1.74414	-0.133834	146	-0.094563	3.58046	0.914859	146	-0.094563	3.43755	1.17781	146	-0.094563	2.99176	1.14535	146	-0.094563	1.73082	-0.477002	146	-0.094563	1.53327	-0.837078	146	-0.094563	1.32688	-1.10227	146	-0.094563	1.31367	-1.0657	146	-0.094563	3.35441	1.00194	146	-0.094563	-0.644931	1.91379	146	-0.094563
147	-1.30323	0.264389	-0.964416	147	-0.073549	1.6955	-0.24119	147	-0.073549	1.74584	-0.122743	147	-0.073549	3.58234	0.927204	147	-0.073549	3.4392	1.18785	147	-0.073549	2.99353	1.15627	147	-0.073549	1.73275	-0.464973	147	-0.073549	1.53526	-0.826585	147	-0.073549	1.32884	-1.08962	147	-0.073549	1.31566	-1.05538	147	-0.073549	3.35624	1.01433	147	-0.073549	-0.642161	1.93539	147	-0.073549
148	-1.29063	0.276511	-0.961011	148	-0.052535	1.69658	-0.232784	148	-0.052535	1.7471	-0.111792	148	-0.052535	3.58375	0.939381	148	-0.052535	3.44044	1.19775	148	-0.052535	2.99486	1.16705	148	-0.052535	1.73419	-0.452997	148	-0.052535	1.53675	-0.816174	148	-0.052535	1.33032	-1.07697	148	-0.052535	1.31715	-1.04515	148	-0.052535	3.35761	1.02662	148	-0.052535	-0.640082	1.95735	148	-0.052535
149	-1.27804	0.28859	-0.957453	149	-0.031521	1.69729	-0.224435	149	-0.031521	1.74795	-0.100987	149	-0.031521	3.58469	0.951385	149	-0.031521	3.44127	1.20751	149	-0.031521	2.99575	1.17766	149	-0.031521	1.73515	-0.441079	149	-0.031521	1.53775	-0.805849	149	-0.031521	1.3313	-1.06432	149	-0.031521	1.31814	-1.035	149	-0.031521	3.35852	1.03881	149	-0.031521	-0.638695	1.97968	149	-0.031521
150	-1.26545	0.300622	-0.953743	150	-0.010507	1.69765	-0.216148	150	-0.010507	1.74837	-0.0903317	150	-0.010507	3.58516	0.963211	150	-0.010507	3.44168	1.21713	150	-0.010507	2.99619	1.18811	150	-0.010507	1.73563	-0.429225	150	-0.010507	1.53825	-0.795615	150	-0.010507	1.3318	-1.05169	150	-0.010507	1.31864	-1.02495	150	-0.010507	3.35898	1.0509	150	-0.010507	-0.638002	2.00235	150	-0.010507
151	-1.25286	0.312607	-0.949882	151	0.010507	1.69765	-0.207925	151	0.010507	1.74837	-0.0798311	151	0.010507	3.58516	0.974854	151	0.010507	3.44168	1.2266	151	0.010507	2.99619	1.19839	151	0.010507	1.73563	-0.417439	151	0.010507	1.53825	-0.785476	151	0.010507	1.3318	-1.03908	151	0.010507	1.31864	-1.01499	151	0.010507	3.35898	1.06287	151	0.010507	-0.638002	2.02535	151	0.010507
152	-1.24027	0.324543	-0.945871	152	0.031521	1.69729	-0.19977	152	0.031521	1.74795	-0.06949	152	0.031521	3.58469	0.986308	152	0.031521	3.44127	1.23591	152	0.031521	2.99575	1.2085	152	0.031521	1.73515	-0.405728	152	0.031521	1.53775	-0.775438	152	0.031521	1.3313	-1.0265	152	0.031521	1.31814	-1.00514	152	0.031521	3.35852	1.07473	152	0.031521	-0.638695	2.04868	152	0.031521
153	-1.22768	0.336427	-0.94171	153	0.052535	1.69658	-0.191687	153	0.052535	1.7471	-0.0593129	153	0.052535	3.58375	0.997569	153	0.052535	3.44044	1.24507	153	0.052535	2.99486	1.21843	153	0.052535	1.73419	-0.394096	153	0.052535	1.53675	-0.765503	153	0.052535	1.33032	-1.01394	153	0.052535	1.31715	-0.995383	153	0.052535	3.35761	1.08647	153	0.052535	-0.640082	2.07233	153	0.052535
154	-1.21508	0.348257	-0.937399	154	0.073549	1.6955	-0.18368	154	0.073549	1.74584	-0.0493041	154	0.073549	3.58234	1.00863	154	0.073549	3.4392	1.25407	154	0.073549	2.99353	1.22818	154	0.073549	1.73275	-0.382548	154	0.073549	1.53526	-0.755677	154	0.073549	1.32884	-1.00142	154	0.073549	1.31566	-0.98574	154	0.073549	3.35624	1.09807	154	0.073549	-0.642161	2.09629	154	0.073549
155	-1.20249	0.360033	-0.93294	155	0.094563	1.69408	-0.175752	155	0.094563	1.74414	-0.0394683	155	0.094563	3.58046	1.01949	155	0.094563	3.43755	1.2629	155	0.094563	2.99176	1.23774	155	0.094563	1.73082	-0.37109	155	0.094563	1.53327	-0.745965	155	0.094563	1.32688	-0.988935	155	0.094563	1.31367	-0.97621	155	0.094563	3.35441	1.10955	155	0.094563	-0.644931	2.12054	155	0.094563
156	-1.1899	0.371751	-0.928332	156	0.115577	1.69229	-0.167906	156	0.115577	1.74203	-0.0298097	156	0.115577	3.57812	1.03014	156	0.115577	3.43549	1.27156	156	0.115577	2.98954	1.24711	156	0.115577	1.72842	-0.359726	156	0.115577	1.53079	-0.736369	156	0.115577	1.32442	-0.9765	156	0.115577	1.31119	-0.966798	156	0.115577	3.35213	1.12089	156	0.115577	-0.648392	2.14507	156	0.115577
157	-1.17731	0.38341	-0.923578	157	0.136591	1.69015	-0.160146	157	0.136591	1.7395	-0.0203326	157	0.136591	3.5753	1.04058	157	0.136591	3.43302	1.28005	157	0.136591	2.98689	1.25629	157	0.136591	1.72554	-0.348462	157	0.136591	1.52782	-0.726895	157	0.136591	1.32147	-0.964116	157	0.136591	1.30822	-0.957508	157	0.136591	3.34939	1.13208	157	0.136591	-0.652542	2.16988	157	0.136591
158	-1.16472	0.395009	-0.918677	158	0.157605	1.68766	-0.152476	158	0.157605	1.73654	-0.0110412	158	0.157605	3.57202	1.0508	158	0.157605	3.43014	1.28836	158	0.157605	2.98379	1.26527	158	0.157605	1.72219	-0.337302	158	0.157605	1.52435	-0.717547	158	0.157605	1.31804	-0.951789	158	0.157605	1.30475	-0.948343	158	0.157605	3.3462	1.14313	158	0.157605	-0.657379	2.19495	158	0.157605
159	-1.15213	0.406545	-0.913631	159	0.178619	1.68481	-0.144898	159	0.178619	1.73317	-0.00193949	159	0.178619	3.56828	1.0608	159	0.178619	3.42685	1.2965	159	0.178619	2.98026	1.27405	159	0.178619	1.71836	-0.326252	159	0.178619	1.52039	-0.708328	159	0.178619	1.31412	-0.939524	159	0.178619	1.30079	-0.939308	159	0.178619	3.34255	1.15403	159	0.178619	-0.662901	2.22027	159	0.178619
160	-1.13954	0.418016	-0.908439	160	0.199633	1.68161	-0.137417	160	0.199633	1.72938	0.00696839	160	0.199633	3.56407	1.07057	160	0.199633	3.42316	1.30445	160	0.199633	2.97629	1.28262	160	0.199633	1.71405	-0.315316	160	0.199633	1.51594	-0.699244	160	0.199633	1.30972	-0.927328	160	0.199633	1.29634	-0.930407	160	0.199633	3.33846	1.16477	160	0.199633	-0.669105	2.24584	160	0.199633
161	-1.12694	0.429422	-0.903104	161	0.220647	1.67807	-0.130035	161	0.220647	1.72518	0.0156785	161	0.220647	3.5594	1.08011	161	0.220647	3.41906	1.31221	161	0.220647	2.97188	1.29098	161	0.220647	1.70928	-0.304499	161	0.220647	1.511	-0.690297	161	0.220647	1.30483	-0.915205	161	0.220647	1.29141	-0.921644	161	0.220647	3.33392	1.17535	161	0.220647	-0.675989	2.27163	161	0.220647
162	-1.11435	0.440759	-0.897626	162	0.241661	1.67417	-0.122755	162	0.241661	1.72056	0.0241871	162	0.241661	3.55427	1.08942	162	0.241661	3.41455	1.31978	162	0.241661	2.96704	1.29913	162	0.241661	1.70403	-0.293806	162	0.241661	1.50557	-0.681492	162	0.241661	1.29946	-0.90316	162	0.241661	1.28599	-0.913023	162	0.241661	3.32893	1.18576	162	0.241661	-0.683549	2.29764	162	0.241661
163	-1.10176	0.452026	-0.892005	163	0.262675	1.66992	-0.115582	163	0.262675	1.71554	0.0324904	163	0.262675	3.54869	1.09848	163	0.262675	3.40965	1.32716	163	0.262675	2.96177	1.30706	163	0.262675	1.69832	-0.283241	163	0.262675	1.49967	-0.672834	163	0.262675	1.29362	-0.8912	163	0.262675	1.28008	-0.904547	163	0.262675	3.3235	1.196	163	0.262675	-0.691783	2.32386	163	0.262675
164	-1.08917	0.463222	-0.886242	164	0.283689	1.66533	-0.108518	164	0.283689	1.7101	0.0405846	164	0.283689	3.54265	1.10731	164	0.283689	3.40435	1.33434	164	0.283689	2.95607	1.31477	164	0.283689	1.69214	-0.27281	164	0.283689	1.49328	-0.664324	164	0.283689	1.2873	-0.879329	164	0.283689	1.2737	-0.89622	164	0.283689	3.31763	1.20606	164	0.283689	-0.700686	2.35027	164	0.283689
165	-1.07658	0.474344	-0.88034	165	0.304703	1.6604	-0.101566	165	0.304703	1.70426	0.0484663	165	0.304703	3.53616	1.11589	165	0.304703	3.39865	1.34132	165	0.304703	2.94995	1.32225	165	0.304703	1.6855	-0.262517	165	0.304703	1.48642	-0.655968	165	0.304703	1.28051	-0.867552	165	0.304703	1.26684	-0.888046	165	0.304703	3.31132	1.21595	165	0.304703	-0.710255	2.37686	165	0.304703
166	-1.06399	0.485391	-0.874297	166	0.325717	1.65513	-0.0947292	166	0.325717	1.69801	0.0561319	166	0.325717	3.52922	1.12421	166	0.325717	3.39256	1.34809	166	0.325717	2.9434	1.32951	166	0.325717	1.67841	-0.252366	166	0.325717	1.47908	-0.647769	166	0.325717	1.27324	-0.855875	166	0.325717	1.2595	-0.880029	166	0.325717	3.30457	1.22565	166	0.325717	-0.720486	2.40363	166	0.325717
167	-1.05139	0.496361	-0.868116	167	0.346731	1.64952	-0.0880108	167	0.346731	1.69136	0.0635781	167	0.346731	3.52183	1.13228	167	0.346731	3.38607	1.35466	167	0.346731	2.93643	1.33653	167	0.346731	1.67085	-0.242363	167	0.346731	1.47127	-0.639731	167	0.346731	1.26551	-0.844303	167	0.346731	1.2517	-0.872172	167	0.346731	3.29738	1.23516	167	0.346731	-0.731374	2.43055	167	0.346731
168	-1.0388	0.507252	-0.861798	168	0.367745	1.64357	-0.0814137	168	0.367745	1.68432	0.0708016	168	0.367745	3.514	1.1401	168	0.367745	3.3792	1.36102	168	0.367745	2.92904	1.34333	168	0.367745	1.66285	-0.23251	168	0.367745	1.46299	-0.631857	168	0.367745	1.25732	-0.832841	168	0.367745	1.24343	-0.864478	168	0.367745	3.28977	1.24448	168	0.367745	-0.742914	2.45762	168	0.367745
169	-1.02621	0.518063	-0.855343	169	0.388759	1.63729	-0.0749407	169	0.388759	1.67688	0.0777991	169	0.388759	3.50574	1.14765	169	0.388759	3.37194	1.36717	169	0.388759	2.92124	1.34988	169	0.388759	1.65439	-0.222813	169	0.388759	1.45425	-0.62415	169	0.388759	1.24867	-0.821494	169	0.388759	1.23469	-0.856951	169	0.388759	3.28173	1.2536	169	0.388759	-0.755101	2.48483	169	0.388759
170	-1.01362	0.528792	-0.848752	170	0.409773	1.63067	-0.0685948	170	0.409773	1.66904	0.0845677	170	0.409773	3.49704	1.15494	170	0.409773	3.3643	1.3731	170	0.409773	2.91303	1.3562	170	0.409773	1.64549	-0.213277	170	0.409773	1.44505	-0.616615	170	0.409773	1.23957	-0.810267	170	0.409773	1.22549	-0.849595	170	0.409773	3.27327	1.26252	170	0.409773	-0.767929	2.51216	170	0.409773
171	-1.00103	0.539437	-0.842026	171	0.430787	1.62373	-0.0623787	171	0.430787	1.66082	0.0911042	171	0.430787	3.4879	1.16196	171	0.430787	3.35628	1.37881	171	0.430787	2.90441	1.36227	171	0.430787	1.63615	-0.203904	171	0.430787	1.43539	-0.609254	171	0.430787	1.23001	-0.799165	171	0.430787	1.21584	-0.842411	171	0.430787	3.26439	1.27124	171	0.430787	-0.781394	2.53961	171	0.430787
172	-0.988437	0.549996	-0.835167	172	0.451801	1.61647	-0.0562952	172	0.451801	1.65222	0.0974059	172	0.451801	3.47834	1.16871	172	0.451801	3.34789	1.38431	172	0.451801	2.89539	1.3681	172	0.451801	1.62637	-0.1947	172	0.451801	1.42528	-0.602071	172	0.451801	1.22	-0.788193	172	0.451801	1.20573	-0.835405	172	0.451801	3.25509	1.27974	172	0.451801	-0.795489	2.56715	172	0.451801
173	-0.975845	0.560468	-0.828176	173	0.472815	1.60888	-0.050347	173	0.472815	1.64323	0.10347	173	0.472815	3.46836	1.17518	173	0.472815	3.33912	1.38958	173	0.472815	2.88597	1.37368	173	0.472815	1.61616	-0.185668	173	0.472815	1.41472	-0.595069	173	0.472815	1.20955	-0.777356	173	0.472815	1.19518	-0.828578	173	0.472815	3.24538	1.28804	173	0.472815	-0.810208	2.59478	173	0.472815
174	-0.963254	0.570851	-0.821053	174	0.493829	1.60097	-0.0445367	174	0.493829	1.63387	0.109294	174	0.493829	3.45796	1.18138	174	0.493829	3.32999	1.39463	174	0.493829	2.87615	1.37901	174	0.493829	1.60552	-0.176813	174	0.493829	1.40372	-0.58825	174	0.493829	1.19867	-0.766658	174	0.493829	1.18418	-0.821934	174	0.493829	3.23526	1.29612	174	0.493829	-0.825544	2.62249	174	0.493829
175	-0.950662	0.581144	-0.813801	175	0.514843	1.59275	-0.0388669	175	0.514843	1.62413	0.114874	175	0.514843	3.44714	1.1873	175	0.514843	3.32049	1.39945	175	0.514843	2.86595	1.38408	175	0.514843	1.59446	-0.168138	175	0.514843	1.39228	-0.581619	175	0.514843	1.18735	-0.756105	175	0.514843	1.17275	-0.815476	175	0.514843	3.22474	1.30398	175	0.514843	-0.841491	2.65026	175	0.514843
176	-0.938071	0.591345	-0.806419	176	0.535857	1.58422	-0.03334	176	0.535857	1.61403	0.12021	176	0.535857	3.43592	1.19293	176	0.535857	3.31064	1.40404	176	0.535857	2.85535	1.38891	176	0.535857	1.58298	-0.159646	176	0.535857	1.38041	-0.575177	176	0.535857	1.1756	-0.7457	176	0.535857	1.16089	-0.809206	176	0.535857	3.21382	1.31161	176	0.535857	-0.858041	2.67807	176	0.535857
177	-0.925479	0.601452	-0.798909	177	0.556871	1.57538	-0.0279585	177	0.556871	1.60356	0.125297	177	0.556871	3.42429	1.19829	177	0.556871	3.30042	1.4084	177	0.556871	2.84438	1.39347	177	0.556871	1.57108	-0.151343	177	0.556871	1.36811	-0.568928	177	0.556871	1.16343	-0.735449	177	0.556871	1.14859	-0.803128	177	0.556871	3.20251	1.31902	177	0.556871	-0.875188	2.70593	177	0.556871
178	-0.912888	0.611463	-0.791273	178	0.577885	1.56624	-0.0227249	178	0.577885	1.59273	0.130135	178	0.577885	3.41226	1.20335	178	0.577885	3.28986	1.41253	178	0.577885	2.83303	1.39778	178	0.577885	1.55878	-0.143232	178	0.577885	1.35539	-0.562875	178	0.577885	1.15084	-0.725356	178	0.577885	1.13588	-0.797244	178	0.577885	3.19081	1.3262	178	0.577885	-0.892923	2.73381	178	0.577885
179	-0.900296	0.621378	-0.783511	179	0.598899	1.5568	-0.0176413	179	0.598899	1.58154	0.134721	179	0.598899	3.39983	1.20812	179	0.598899	3.27895	1.41642	179	0.598899	2.8213	1.40182	179	0.598899	1.54607	-0.135315	179	0.598899	1.34225	-0.557019	179	0.598899	1.13784	-0.715426	179	0.598899	1.12275	-0.791556	179	0.598899	3.17873	1.33315	179	0.598899	-0.911239	2.76171	179	0.598899
180	-0.887705	0.631194	-0.775625	180	0.619913	1.54706	-0.0127101	180	0.619913	1.57001	0.139052	180	0.619913	3.38702	1.21261	180	0.619913	3.2677	1.42007	180	0.619913	2.80921	1.4056	180	0.619913	1.53296	-0.127597	180	0.619913	1.3287	-0.551365	180	0.619913	1.12443	-0.705662	180	0.619913	1.1092	-0.786067	180	0.619913	3.16627	1.33985	180	0.619913	-0.930128	2.78961	180	0.619913
181	-0.875113	0.64091	-0.767616	181	0.640927	1.53703	-0.00793335	181	0.640927	1.55813	0.143127	181	0.640927	3.37383	1.2168	181	0.640927	3.25612	1.42349	181	0.640927	2.79676	1.40912	181	0.640927	1.51947	-0.120082	181	0.640927	1.31475	-0.545913	181	0.640927	1.11062	-0.69607	181	0.640927	1.09526	-0.78078	181	0.640927	3.15343	1.34633	181	0.640927	-0.949581	2.8175	181	0.640927
182	-0.862521	0.650525	-0.759485	182	0.661941	1.52672	-0.00331327	182	0.661941	1.54592	0.146945	182	0.661941	3.36026	1.22069	182	0.661941	3.2442	1.42666	182	0.661941	2.78395	1.41237	182	0.661941	1.50559	-0.112771	182	0.661941	1.30039	-0.540668	182	0.661941	1.09642	-0.686653	182	0.661941	1.08091	-0.775697	182	0.661941	3.14023	1.35255	182	0.661941	-0.96959	2.84536	182	0.661941
183	-0.84993	0.660036	-0.751234	183	0.682955	1.51612	0.00114815	183	0.682955	1.53337	0.150503	183	0.682955	3.34631	1.22429	183	0.682955	3.23196	1.4296	183	0.682955	2.77079	1.41536	183	0.682955	1.49133	-0.105669	183	0.682955	1.28565	-0.53563	183	0.682955	1.08182	-0.677416	183	0.682955	1.06617	-0.77082	183	0.682955	3.12667	1.35854	183	0.682955	-0.990146	2.87319	183	0.682955
184	-0.837338	0.669442	-0.742864	184	0.703969	1.50525	0.00544892	184	0.703969	1.52049	0.1538	184	0.703969	3.33201	1.22759	184	0.703969	3.2194	1.43229	184	0.703969	2.75729	1.41807	184	0.703969	1.47669	-0.0987789	184	0.703969	1.27052	-0.530802	184	0.703969	1.06685	-0.668362	184	0.703969	1.05105	-0.766151	184	0.703969	3.11276	1.36427	184	0.703969	-1.01124	2.90097	184	0.703969
185	-0.824747	0.678743	-0.734376	185	0.724983	1.4941	0.00958715	185	0.724983	1.50728	0.156834	185	0.724983	3.31734	1.23059	185	0.724983	3.20652	1.43474	185	0.724983	2.74345	1.42052	185	0.724983	1.46169	-0.0921034	185	0.724983	1.25501	-0.526187	185	0.724983	1.0515	-0.659496	185	0.724983	1.03555	-0.761692	185	0.724983	3.09849	1.36976	185	0.724983	-1.03286	2.92869	185	0.724983
186	-0.812155	0.687936	-0.725772	186	0.745997	1.48269	0.013561	186	0.745997	1.49377	0.159605	186	0.745997	3.30232	1.23328	186	0.745997	3.19333	1.43694	186	0.745997	2.72928	1.42269	186	0.745997	1.44633	-0.0856457	186	0.745997	1.23912	-0.521786	186	0.745997	1.03579	-0.650822	186	0.745997	1.01967	-0.757446	186	0.745997	3.08389	1.375	186	0.745997	-1.055	2.95634	186	0.745997
187	-0.799564	0.69702	-0.717052	187	0.767011	1.47101	0.0173688	187	0.767011	1.47994	0.16211	187	0.767011	3.28696	1.23568	187	0.767011	3.17984	1.4389	187	0.767011	2.71478	1.4246	187	0.767011	1.43061	-0.0794085	187	0.767011	1.22288	-0.517601	187	0.767011	1.01971	-0.642343	187	0.767011	1.00343	-0.753414	187	0.767011	3.06894	1.37998	187	0.767011	-1.07766	2.98391	187	0.767011
188	-0.786972	0.705993	-0.708219	188	0.788025	1.45908	0.0210087	188	0.788025	1.4658	0.164349	188	0.788025	3.27126	1.23777	188	0.788025	3.16606	1.44061	188	0.788025	2.69996	1.42623	188	0.788025	1.41455	-0.0733946	188	0.788025	1.20627	-0.513635	188	0.788025	1.00327	-0.634063	188	0.788025	0.986837	-0.749598	188	0.788025	3.05367	1.3847	188	0.788025	-1.10081	3.01137	188	0.788025
189	-0.774381	0.714854	-0.699273	189	0.809039	1.44689	0.0244792	189	0.809039	1.45137	0.166321	189	0.809039	3.25522	1.23956	189	0.809039	3.15198	1.44208	189	0.809039	2.68483	1.42758	189	0.809039	1.39815	-0.0676066	189	0.809039	1.18931	-0.509888	189	0.809039	0.986493	-0.625986	189	0.809039	0.969888	-0.745999	189	0.809039	3.03808	1.38916	189	0.809039	-1.12445	3.03873	189	0.809039
190	-0.761789	0.723602	-0.690217	190	0.830053	1.43446	0.0277788	190	0.830053	1.43664	0.168024	190	0.830053	3.23886	1.24104	190	0.830053	3.13762	1.44329	190	0.830053	2.6694	1.42867	190	0.830053	1.38142	-0.0620472	190	0.830053	1.17201	-0.506363	190	0.830053	0.969372	-0.618116	190	0.830053	0.952597	-0.74262	190	0.830053	3.02217	1.39337	190	0.830053	-1.14856	3.06597	190	0.830053
191	-0.749197	0.732236	-0.681051	191	0.851067	1.42179	0.030906	191	0.851067	1.42163	0.169459	191	0.851067	3.22219	1.24221	191	0.851067	3.12297	1.44426	191	0.851067	2.65366	1.42948	191	0.851067	1.36436	-0.0567187	191	0.851067	1.15438	-0.503061	191	0.851067	0.95192	-0.610455	191	0.851067	0.934971	-0.739462	191	0.851067	3.00595	1.39731	191	0.851067	-1.17315	3.09307	191	0.851067
192	-0.736606	0.740753	-0.671778	192	0.872081	1.40888	0.0338594	192	0.872081	1.40634	0.170625	192	0.872081	3.2052	1.24308	192	0.872081	3.10806	1.44498	192	0.872081	2.63763	1.43001	192	0.872081	1.34699	-0.0516236	192	0.872081	1.13641	-0.499984	192	0.872081	0.934143	-0.603008	192	0.872081	0.917016	-0.736525	192	0.872081	2.98943	1.40098	192	0.872081	-1.19819	3.12003	192	0.872081
193	-0.724014	0.749153	-0.662397	193	0.893095	1.39574	0.0366378	193	0.893095	1.39078	0.17152	193	0.893095	3.18791	1.24364	193	0.893095	3.09288	1.44545	193	0.893095	2.62131	1.43027	193	0.893095	1.32931	-0.046764	193	0.893095	1.11813	-0.497132	193	0.893095	0.91605	-0.595777	193	0.893095	0.898742	-0.733812	193	0.893095	2.97261	1.40439	193	0.893095	-1.22368	3.14684	193	0.893095
194	-0.711423	0.757434	-0.652912	194	0.914109	1.38238	0.0392398	194	0.914109	1.37495	0.172145	194	0.914109	3.17033	1.2439	194	0.914109	3.07744	1.44567	194	0.914109	2.60472	1.43025	194	0.914109	1.31132	-0.0421422	194	0.914109	1.09954	-0.494508	194	0.914109	0.897648	-0.588766	194	0.914109	0.880156	-0.731324	194	0.914109	2.95551	1.40754	194	0.914109	-1.24961	3.17347	194	0.914109
195	-0.698831	0.765595	-0.643323	195	0.935123	1.3688	0.0416643	195	0.935123	1.35886	0.1725	195	0.935123	3.15246	1.24384	195	0.935123	3.06175	1.44564	195	0.935123	2.58786	1.42996	195	0.935123	1.29304	-0.0377601	195	0.935123	1.08064	-0.492112	195	0.935123	0.878945	-0.581977	195	0.935123	0.861266	-0.729061	195	0.935123	2.93813	1.41041	195	0.935123	-1.27595	3.19992	195	0.935123
196	-0.68624	0.773634	-0.633633	196	0.956137	1.355	0.0439104	196	0.956137	1.34252	0.172583	196	0.956137	3.13431	1.24348	196	0.956137	3.04581	1.44536	196	0.956137	2.57073	1.42939	196	0.956137	1.27448	-0.0336197	196	0.956137	1.06144	-0.489945	196	0.956137	0.85995	-0.575415	196	0.956137	0.842082	-0.727025	196	0.956137	2.92048	1.41301	196	0.956137	-1.30271	3.22619	196	0.956137
197	-0.673648	0.781551	-0.623841	197	0.977151	1.341	0.0459769	197	0.977151	1.32594	0.172396	197	0.977151	3.11589	1.24282	197	0.977151	3.02964	1.44483	197	0.977151	2.55335	1.42855	197	0.977151	1.25564	-0.0297229	197	0.977151	1.04196	-0.488009	197	0.977151	0.840671	-0.569081	197	0.977151	0.82261	-0.725217	197	0.977151	2.90256	1.41534	197	0.977151	-1.32987	3.25224	197	0.977151
198	-0.661057	0.789344	-0.613951	198	0.998165	1.3268	0.0478629	198	0.998165	1.30912	0.171938	198	0.998165	3.0972	1.24184	198	0.998165	3.01323	1.44405	198	0.998165	2.53571	1.42743	198	0.998165	1.23652	-0.0260712	198	0.998165	1.0222	-0.486304	198	0.998165	0.821117	-0.562979	198	0.998165	0.802861	-0.723637	198	0.998165	2.88439	1.4174	198	0.998165	-1.35742	3.27809	198	0.998165
199	-0.648465	0.797012	-0.603964	199	1.01918	1.31241	0.0495677	199	1.01918	1.29207	0.171209	199	1.01918	3.07826	1.24056	199	1.01918	2.9966	1.44302	199	1.01918	2.51784	1.42604	199	1.01918	1.21715	-0.0226665	199	1.01918	1.00217	-0.484831	199	1.01918	0.801296	-0.557111	199	1.01918	0.782842	-0.722286	199	1.01918	2.86597	1.41919	199	1.01918	-1.38534	3.3037	199	1.01918
200	-0.635873	0.804553	-0.59388	200	1.04019	1.29783	0.0510905	200	1.04019	1.2748	0.17021	200	1.04019	3.05908	1.23898	200	1.04019	2.97976	1.44174	200	1.04019	2.49974	1.42437	200	1.04019	1.19753	-0.0195101	200	1.04019	0.981882	-0.48359	200	1.04019	0.781217	-0.551479	200	1.04019	0.762562	-0.721165	200	1.04019	2.84731	1.4207	200	1.04019	-1.41363	3.32908	200	1.04019
201	-0.623282	0.811967	-0.583703	201	1.06121	1.28307	0.0524306	201	1.06121	1.25732	0.168941	201	1.06121	3.03965	1.23709	201	1.06121	2.9627	1.44022	201	1.06121	2.48141	1.42244	201	1.06121	1.17766	-0.0166034	201	1.06121	0.96134	-0.482583	201	1.06121	0.760889	-0.546088	201	1.06121	0.742031	-0.720274	201	1.06121	2.82842	1.42194	201	1.06121	-1.44226	3.35421	201	1.06121
202	-0.61069	0.819252	-0.573433	202	1.08222	1.26813	0.0535874	202	1.08222	1.23963	0.167403	202	1.08222	3.02	1.23489	202	1.08222	2.94545	1.43845	202	1.08222	2.46286	1.42023	202	1.08222	1.15756	-0.0139478	202	1.08222	0.940556	-0.481809	202	1.08222	0.740321	-0.540937	202	1.08222	0.721258	-0.719614	202	1.08222	2.8093	1.4229	202	1.08222	-1.47124	3.37908	202	1.08222
203	-0.598099	0.826408	-0.563072	203	1.10323	1.25303	0.0545604	203	1.10323	1.22174	0.165597	203	1.10323	3.00013	1.23239	203	1.10323	2.928	1.43643	203	1.10323	2.4441	1.41775	203	1.10323	1.13723	-0.0115445	203	1.10323	0.919538	-0.48127	203	1.10323	0.719522	-0.536031	203	1.10323	0.700251	-0.719184	203	1.10323	2.78997	1.42359	203	1.10323	-1.50054	3.40368	203	1.10323
204	-0.585507	0.833432	-0.552622	204	1.12425	1.23776	0.0553492	204	1.12425	1.20365	0.163523	204	1.12425	2.98004	1.22959	204	1.12425	2.91036	1.43417	204	1.12425	2.42515	1.415	204	1.12425	1.11669	-0.00939433	204	1.12425	0.898296	-0.480964	204	1.12425	0.698501	-0.531371	204	1.12425	0.67902	-0.718986	204	1.12425	2.77044	1.424	204	1.12425	-1.53015	3.42799	204	1.12425
205	-0.572916	0.840324	-0.542084	205	1.14526	1.22234	0.0559534	205	1.14526	1.18539	0.161181	205	1.14526	2.95975	1.22649	205	1.14526	2.89255	1.43166	205	1.14526	2.406	1.41198	205	1.14526	1.09593	-0.00749844	205	1.14526	0.87684	-0.480893	205	1.14526	0.677268	-0.526959	205	1.14526	0.657574	-0.719018	205	1.14526	2.7507	1.42413	205	1.14526	-1.56007	3.45202	205	1.14526
206	-0.560324	0.847083	-0.531461	206	1.16628	1.20677	0.0563727	206	1.16628	1.16695	0.158574	206	1.16628	2.93927	1.22309	206	1.16628	2.87456	1.42891	206	1.16628	2.38667	1.40869	206	1.16628	1.07498	-0.00585759	206	1.16628	0.855178	-0.481056	206	1.16628	0.655831	-0.522797	206	1.16628	0.635923	-0.719282	206	1.16628	2.73078	1.42399	206	1.16628	-1.59026	3.47573	206	1.16628
207	-0.547733	0.853707	-0.520753	207	1.18729	1.19107	0.0566071	207	1.18729	1.14835	0.155703	207	1.18729	2.9186	1.21939	207	1.18729	2.85641	1.42591	207	1.18729	2.36717	1.40514	207	1.18729	1.05384	-0.00447254	207	1.18729	0.83332	-0.481453	207	1.18729	0.6342	-0.518887	207	1.18729	0.614076	-0.719777	207	1.18729	2.71068	1.42357	207	1.18729	-1.62074	3.49914	207	1.18729
208	-0.535141	0.860197	-0.509962	208	1.2083	1.17522	0.0566563	208	1.2083	1.12958	0.152568	208	1.2083	2.89776	1.21539	208	1.2083	2.83811	1.42268	208	1.2083	2.3475	1.40133	208	1.2083	1.03252	-0.00334388	208	1.2083	0.811276	-0.482085	208	1.2083	0.612386	-0.51523	208	1.2083	0.592044	-0.720503	208	1.2083	2.69041	1.42288	208	1.2083	-1.65147	3.52222	208	1.2083
209	-0.522549	0.86655	-0.499091	209	1.22932	1.15926	0.0565203	209	1.22932	1.11067	0.14917	209	1.22932	2.87674	1.2111	209	1.22932	2.81966	1.4192	209	1.22932	2.32767	1.39725	209	1.22932	1.01103	-0.00247211	209	1.22932	0.789056	-0.48295	209	1.22932	0.590396	-0.511829	209	1.22932	0.569835	-0.721459	209	1.22932	2.66997	1.4219	209	1.22932	-1.68245	3.54497	209	1.22932
210	-0.509958	0.872765	-0.488141	210	1.25033	1.14317	0.0561993	210	1.25033	1.09161	0.145513	210	1.25033	2.85558	1.20652	210	1.25033	2.80108	1.41549	210	1.25033	2.3077	1.39291	210	1.25033	0.98938	-0.00185762	210	1.25033	0.766669	-0.484049	210	1.25033	0.568242	-0.508685	210	1.25033	0.547459	-0.722645	210	1.25033	2.64938	1.42066	210	1.25033	-1.71365	3.56737	210	1.25033
211	-0.497366	0.878842	-0.477113	211	1.27135	1.12697	0.0556933	211	1.27135	1.07243	0.141596	211	1.27135	2.83426	1.20165	211	1.27135	2.78236	1.41154	211	1.27135	2.28758	1.38831	211	1.27135	0.967576	-0.00150067	211	1.27135	0.744125	-0.48538	211	1.27135	0.545933	-0.505799	211	1.27135	0.524927	-0.724061	211	1.27135	2.62865	1.41914	211	1.27135	-1.74508	3.58942	211	1.27135
212	-0.484775	0.88478	-0.466009	212	1.29236	1.11066	0.0550026	212	1.29236	1.05311	0.137423	212	1.29236	2.8128	1.19648	212	1.29236	2.76352	1.40736	212	1.29236	2.26733	1.38346	212	1.29236	0.945631	-0.00140144	212	1.29236	0.721435	-0.486944	212	1.29236	0.523479	-0.503173	212	1.29236	0.502248	-0.725706	212	1.29236	2.60778	1.41734	212	1.29236	-1.77672	3.6111	212	1.29236
213	-0.472183	0.890577	-0.454832	213	1.31337	1.09426	0.0541275	213	1.31337	1.03368	0.132994	213	1.31337	2.79122	1.19104	213	1.31337	2.74457	1.40294	213	1.31337	2.24696	1.37835	213	1.31337	0.923553	-0.00155996	213	1.31337	0.698608	-0.48874	213	1.31337	0.500889	-0.500807	213	1.31337	0.479433	-0.727579	213	1.31337	2.58679	1.41528	213	1.31337	-1.80854	3.63241	213	1.31337
214	-0.459592	0.896234	-0.443582	214	1.33439	1.07776	0.0530683	214	1.33439	1.01414	0.128311	214	1.33439	2.76951	1.1853	214	1.33439	2.72551	1.3983	214	1.33439	2.22648	1.37299	214	1.33439	0.901353	-0.00197615	214	1.33439	0.675654	-0.490766	214	1.33439	0.478174	-0.498702	214	1.33439	0.456491	-0.729679	214	1.33439	2.56568	1.41294	214	1.33439	-1.84054	3.65334	214	1.33439
215	-0.447	0.901748	-0.432262	215	1.3554	1.06118	0.0518256	215	1.3554	0.994506	0.123378	215	1.3554	2.7477	1.17929	215	1.3554	2.70636	1.39342	215	1.3554	2.20589	1.36738	215	1.3554	0.87904	-0.00264985	215	1.3554	0.652584	-0.493023	215	1.3554	0.455344	-0.496861	215	1.3554	0.433433	-0.732006	215	1.3554	2.54446	1.41032	215	1.3554	-1.8727	3.67388	215	1.3554
216	-0.434409	0.907119	-0.420874	216	1.37642	1.04453	0.0503999	216	1.37642	0.974779	0.118195	216	1.37642	2.72578	1.173	216	1.37642	2.68711	1.38832	216	1.37642	2.18521	1.36152	216	1.37642	0.856624	-0.00358074	216	1.37642	0.629407	-0.495509	216	1.37642	0.432408	-0.495282	216	1.37642	0.410268	-0.734558	216	1.37642	2.52315	1.40744	216	1.37642	-1.90501	3.69401	216	1.37642
217	-0.421817	0.912347	-0.409419	217	1.39743	1.0278	0.0487917	217	1.39743	0.954969	0.112765	217	1.39743	2.70378	1.16643	217	1.39743	2.66779	1.38299	217	1.39743	2.16445	1.35541	217	1.39743	0.834115	-0.00476843	217	1.39743	0.606134	-0.498222	217	1.39743	0.409378	-0.493968	217	1.39743	0.387007	-0.737335	217	1.39743	2.50174	1.40429	217	1.39743	-1.93745	3.71373	217	1.39743
218	-0.409226	0.917429	-0.397899	218	1.41844	1.01102	0.0470019	218	1.41844	0.935087	0.107091	218	1.41844	2.68169	1.15958	218	1.41844	2.6484	1.37744	218	1.41844	2.1436	1.34907	218	1.41844	0.811523	-0.00621237	218	1.41844	0.582776	-0.501162	218	1.41844	0.386262	-0.492919	218	1.41844	0.363661	-0.740334	218	1.41844	2.48026	1.40087	218	1.41844	-1.97002	3.73304	218	1.41844
219	-0.396634	0.922367	-0.386316	219	1.43946	0.994177	0.0450312	219	1.43946	0.91514	0.101175	219	1.43946	2.65953	1.15247	219	1.43946	2.62894	1.37167	219	1.43946	2.12269	1.34248	219	1.43946	0.788859	-0.00791195	219	1.43946	0.559342	-0.504328	219	1.43946	0.363072	-0.492135	219	1.43946	0.340239	-0.743555	219	1.43946	2.45871	1.39719	219	1.43946	-2.00269	3.75191	219	1.43946
220	-0.384042	0.927158	-0.374671	220	1.46047	0.977289	0.0428805	220	1.46047	0.895138	0.0950194	220	1.46047	2.63731	1.14509	220	1.46047	2.60943	1.36569	220	1.46047	2.10172	1.33566	220	1.46047	0.766131	-0.0098664	220	1.46047	0.535843	-0.507717	220	1.46047	0.339817	-0.491616	220	1.46047	0.316752	-0.746997	220	1.46047	2.4371	1.39324	220	1.46047	-2.03545	3.77035	220	1.46047
221	-0.371451	0.931802	-0.362968	221	1.48149	0.960363	0.0405507	221	1.48149	0.875089	0.0886274	221	1.48149	2.61504	1.13745	221	1.48149	2.58988	1.35949	221	1.48149	2.08071	1.3286	221	1.48149	0.74335	-0.0120749	221	1.48149	0.512289	-0.511329	221	1.48149	0.316508	-0.491363	221	1.48149	0.29321	-0.750657	221	1.48149	2.41544	1.38903	221	1.48149	-2.06828	3.78835	221	1.48149
222	-0.358859	0.936298	-0.351206	222	1.5025	0.943405	0.0380429	222	1.5025	0.855002	0.0820016	222	1.5025	2.59273	1.12955	222	1.5025	2.57029	1.35308	222	1.5025	2.05965	1.32132	222	1.5025	0.720527	-0.0145364	222	1.5025	0.488691	-0.515162	222	1.5025	0.293156	-0.491375	222	1.5025	0.269624	-0.754535	222	1.5025	2.39373	1.38456	222	1.5025	-2.10118	3.8059	222	1.5025
223	-0.346268	0.940646	-0.339389	223	1.52351	0.926422	0.0353581	223	1.52351	0.834887	0.075145	223	1.52351	2.57038	1.12139	223	1.52351	2.55066	1.34646	223	1.52351	2.03856	1.31381	223	1.52351	0.69767	-0.0172498	223	1.52351	0.465059	-0.519214	223	1.52351	0.269769	-0.491654	223	1.52351	0.246004	-0.758627	223	1.52351	2.372	1.37982	223	1.52351	-2.13413	3.82298	223	1.52351
224	-0.333676	0.944845	-0.327519	224	1.54453	0.909422	0.0324976	224	1.54453	0.814751	0.0680605	224	1.54453	2.54801	1.11298	224	1.54453	2.53102	1.33963	224	1.54453	2.01745	1.30607	224	1.54453	0.674791	-0.020214	224	1.54453	0.441403	-0.523484	224	1.54453	0.24636	-0.492198	224	1.54453	0.22236	-0.762934	224	1.54453	2.35024	1.37484	224	1.54453	-2.16711	3.8396	224	1.54453
225	-0.321085	0.948894	-0.315596	225	1.56554	0.892413	0.0294627	225	1.56554	0.794605	0.0607513	225	1.56554	2.52563	1.10431	225	1.56554	2.51137	1.33261	225	1.56554	1.99633	1.29811	225	1.56554	0.651899	-0.0234277	225	1.56554	0.417735	-0.527969	225	1.56554	0.222937	-0.493008	225	1.56554	0.198704	-0.767452	225	1.56554	2.32848	1.36959	225	1.56554	-2.2001	3.85574	225	1.56554
226	-0.308493	0.952792	-0.303623	226	1.58656	0.875402	0.0262545	226	1.58656	0.774456	0.0532207	226	1.58656	2.50325	1.09541	226	1.58656	2.49172	1.32538	226	1.58656	1.97521	1.28994	226	1.58656	0.629005	-0.0268893	226	1.58656	0.394063	-0.532668	226	1.58656	0.199512	-0.494083	226	1.58656	0.175045	-0.772181	226	1.58656	2.30671	1.3641	226	1.58656	-2.2331	3.8714	226	1.58656
227	-0.295902	0.95654	-0.291602	227	1.60757	0.858397	0.0228747	227	1.60757	0.754314	0.0454719	227	1.60757	2.48087	1.08626	227	1.60757	2.47207	1.31795	227	1.60757	1.95409	1.28155	227	1.60757	0.606118	-0.0305975	227	1.60757	0.3704	-0.537578	227	1.60757	0.176095	-0.495422	227	1.60757	0.151393	-0.777116	227	1.60757	2.28494	1.35836	227	1.60757	-2.26609	3.88658	227	1.60757
228	-0.28331	0.960135	-0.279535	228	1.62858	0.841404	0.0193246	228	1.62858	0.734187	0.0375083	228	1.62858	2.45851	1.07687	228	1.62858	2.45244	1.31033	228	1.62858	1.93299	1.27295	228	1.62858	0.583249	-0.0345505	228	1.62858	0.346755	-0.542697	228	1.62858	0.152695	-0.497026	228	1.62858	0.12776	-0.782258	228	1.62858	2.2632	1.35236	228	1.62858	-2.29906	3.90126	228	1.62858
229	-0.270718	0.963579	-0.267424	229	1.6496	0.824433	0.0156058	229	1.6496	0.714085	0.0293336	229	1.6496	2.43618	1.06725	229	1.6496	2.43283	1.30253	229	1.6496	1.91192	1.26415	229	1.6496	0.560408	-0.0387467	229	1.6496	0.323138	-0.548024	229	1.6496	0.129324	-0.498893	229	1.6496	0.104156	-0.787602	229	1.6496	2.24148	1.34613	229	1.6496	-2.33198	3.91543	229	1.6496
230	-0.258127	0.96687	-0.25527	230	1.67061	0.80749	0.01172	230	1.67061	0.694016	0.0209512	230	1.67061	2.41389	1.0574	230	1.67061	2.41326	1.29453	230	1.67061	1.89088	1.25514	230	1.67061	0.537604	-0.0431841	230	1.67061	0.299561	-0.553555	230	1.67061	0.105992	-0.501022	230	1.67061	0.0805905	-0.793147	230	1.67061	2.21979	1.33965	230	1.67061	-2.36485	3.9291	230	1.67061
231	-0.245535	0.970007	-0.243076	231	1.69163	0.790582	0.00766896	231	1.69163	0.67399	0.012365	231	1.69163	2.39164	1.04732	231	1.69163	2.39373	1.28635	231	1.69163	1.86989	1.24594	231	1.69163	0.514849	-0.0478608	231	1.69163	0.276033	-0.559289	231	1.69163	0.0827092	-0.503413	231	1.69163	0.0570749	-0.798891	231	1.69163	2.19816	1.33293	231	1.69163	-2.39765	3.94225	231	1.69163
232	-0.232944	0.972991	-0.230843	232	1.71264	0.773717	0.00345435	232	1.71264	0.654014	0.0035786	232	1.71264	2.36945	1.03703	232	1.71264	2.37424	1.278	232	1.71264	1.84895	1.23655	232	1.71264	0.492151	-0.0527747	232	1.71264	0.252565	-0.565222	232	1.71264	0.0594855	-0.506064	232	1.71264	0.0336191	-0.804831	232	1.71264	2.17657	1.32598	232	1.71264	-2.43036	3.95489	232	1.71264
233	-0.220352	0.975821	-0.218573	233	1.73365	0.756903	-0.000921913	233	1.73365	0.634098	-0.00540399	233	1.73365	2.34733	1.02652	233	1.73365	2.35482	1.26947	233	1.73365	1.82807	1.22696	233	1.73365	0.469522	-0.0579237	233	1.73365	0.229168	-0.571352	233	1.73365	0.0363314	-0.508975	233	1.73365	0.0102336	-0.810964	233	1.73365	2.15506	1.31879	233	1.73365	-2.46298	3.967	233	1.73365
234	-0.207761	0.978495	-0.206269	234	1.75467	0.740147	-0.0054579	234	1.75467	0.614251	-0.0145789	234	1.75467	2.32528	1.01579	234	1.75467	2.33546	1.26076	234	1.75467	1.80726	1.21719	234	1.75467	0.44697	-0.0633055	234	1.75467	0.205851	-0.577677	234	1.75467	0.0132571	-0.512144	234	1.75467	-0.0130713	-0.817287	234	1.75467	2.13361	1.31138	234	1.75467	-2.49549	3.97857	234	1.75467
235	-0.195169	0.981015	-0.193932	235	1.77568	0.723456	-0.0101516	235	1.77568	0.594482	-0.0239419	235	1.77568	2.30332	1.00487	235	1.77568	2.31617	1.25189	235	1.77568	1.78654	1.20723	235	1.77568	0.424507	-0.0689177	235	1.77568	0.182625	-0.584193	235	1.77568	-0.00972726	-0.515569	235	1.77568	-0.0362852	-0.823798	235	1.77568	2.11225	1.30374	235	1.77568	-2.52787	3.98962	235	1.77568
236	-0.182578	0.983379	-0.181565	236	1.7967	0.706838	-0.015001	236	1.7967	0.574798	-0.0334891	236	1.7967	2.28145	0.993734	236	1.7967	2.29697	1.24285	236	1.7967	1.7659	1.1971	236	1.7967	0.402141	-0.0747579	236	1.7967	0.1595	-0.590898	236	1.7967	-0.0326114	-0.51925	236	1.7967	-0.059398	-0.830494	236	1.7967	2.09098	1.29587	236	1.7967	-2.56011	4.00012	236	1.7967
237	-0.169986	0.985587	-0.169169	237	1.81771	0.6903	-0.0200039	237	1.81771	0.555209	-0.0432161	237	1.81771	2.25969	0.982407	237	1.81771	2.27787	1.23366	237	1.81771	1.74537	1.1868	237	1.81771	0.379883	-0.0808234	237	1.81771	0.136487	-0.597789	237	1.81771	-0.0553853	-0.523184	237	1.81771	-0.0823995	-0.837372	237	1.81771	2.06982	1.28778	237	1.81771	-2.59219	4.01007	237	1.81771
238	-0.157394	0.987639	-0.156745	238	1.83872	0.673849	-0.025158	238	1.83872	0.535724	-0.0531187	238	1.83872	2.23804	0.970887	238	1.83872	2.25886	1.2243	238	1.83872	1.72494	1.17633	238	1.83872	0.357743	-0.0871116	238	1.83872	0.113596	-0.604863	238	1.83872	-0.0780389	-0.52737	238	1.83872	-0.105279	-0.844429	238	1.83872	2.04877	1.27948	238	1.83872	-2.6241	4.01948	238	1.83872
239	-0.144803	0.989534	-0.144297	239	1.85974	0.657493	-0.0304612	239	1.85974	0.516351	-0.0631924	239	1.85974	2.21652	0.959181	239	1.85974	2.23996	1.2148	239	1.85974	1.70463	1.1657	239	1.85974	0.33573	-0.0936197	239	1.85974	0.0908356	-0.612116	239	1.85974	-0.100562	-0.531806	239	1.85974	-0.128028	-0.851662	239	1.85974	2.02784	1.27097	239	1.85974	-2.65583	4.02833	239	1.85974
240	-0.132211	0.991273	-0.131826	240	1.88075	0.641239	-0.0359111	240	1.88075	0.497099	-0.073433	240	1.88075	2.19514	0.947293	240	1.88075	2.22119	1.20515	240	1.88075	1.68445	1.15491	240	1.88075	0.313854	-0.100345	240	1.88075	0.0682173	-0.619546	240	1.88075	-0.122945	-0.53649	240	1.88075	-0.150634	-0.859067	240	1.88075	2.00703	1.26225	240	1.88075	-2.68736	4.03662	240	1.88075
241	-0.11962	0.992854	-0.119335	241	1.90177	0.625094	-0.0415053	241	1.90177	0.477975	-0.0838357	241	1.90177	2.17389	0.93523	241	1.90177	2.20253	1.19535	241	1.90177	1.6644	1.14396	241	1.90177	0.292125	-0.107284	241	1.90177	0.0457508	-0.627148	241	1.90177	-0.145178	-0.54142	241	1.90177	-0.173089	-0.866641	241	1.90177	1.98637	1.25332	241	1.90177	-2.71868	4.04436	241	1.90177
242	-0.107028	0.994278	-0.106824	242	1.92278	0.609065	-0.0472412	242	1.92278	0.45899	-0.0943961	242	1.92278	2.1528	0.922995	242	1.92278	2.18401	1.18542	242	1.92278	1.6445	1.13287	242	1.92278	0.270552	-0.114434	242	1.92278	0.0234459	-0.634921	242	1.92278	-0.167251	-0.546593	242	1.92278	-0.195383	-0.874382	242	1.92278	1.96586	1.24419	242	1.92278	-2.74978	4.05152	242	1.92278
243	-0.0944367	0.995544	-0.0942964	243	1.94379	0.593159	-0.0531165	243	1.94379	0.44015	-0.105109	243	1.94379	2.13187	0.910594	243	1.94379	2.16564	1.17535	243	1.94379	1.62475	1.12163	243	1.94379	0.249146	-0.121792	243	1.94379	0.00131255	-0.64286	243	1.94379	-0.189154	-0.552008	243	1.94379	-0.217505	-0.882285	243	1.94379	1.9455	1.23487	243	1.94379	-2.78064	4.05812	243	1.94379
244	-0.0818451	0.996653	-0.0817538	244	1.96481	0.577383	-0.0591284	244	1.96481	0.421464	-0.115971	244	1.96481	2.11111	0.898034	244	1.96481	2.14741	1.16515	244	1.96481	1.60516	1.11025	244	1.96481	0.227914	-0.129355	244	1.96481	-0.0206396	-0.650961	244	1.96481	-0.210878	-0.557662	244	1.96481	-0.239446	-0.890347	244	1.96481	1.92531	1.22535	244	1.96481	-2.81124	4.06415	244	1.96481
245	-0.0692536	0.997603	-0.0691982	245	1.98582	0.561745	-0.0652743	245	1.98582	0.402941	-0.126976	245	1.98582	2.09054	0.885318	245	1.98582	2.12935	1.15482	245	1.98582	1.58574	1.09874	245	1.98582	0.206867	-0.137119	245	1.98582	-0.0424007	-0.659222	245	1.98582	-0.232413	-0.563553	245	1.98582	-0.261196	-0.898564	245	1.98582	1.9053	1.21564	245	1.98582	-2.84158	4.06961	245	1.98582
246	-0.056662	0.998395	-0.0566317	246	2.00684	0.546251	-0.0715515	246	2.00684	0.384589	-0.13812	246	2.00684	2.07015	0.872454	246	2.00684	2.11144	1.14438	246	2.00684	1.5665	1.0871	246	2.00684	0.186014	-0.14508	246	2.00684	-0.0639613	-0.667639	246	2.00684	-0.253749	-0.569678	246	2.00684	-0.282745	-0.906934	246	2.00684	1.88547	1.20575	246	2.00684	-2.87163	4.07448	246	2.00684
247	-0.0440704	0.999029	-0.0440562	247	2.02785	0.530908	-0.0779573	247	2.02785	0.366416	-0.149397	247	2.02785	2.04996	0.859447	247	2.02785	2.09372	1.13381	247	2.02785	1.54745	1.07533	247	2.02785	0.165365	-0.153236	247	2.02785	-0.0853118	-0.676207	247	2.02785	-0.274878	-0.576033	247	2.02785	-0.304085	-0.915451	247	2.02785	1.86584	1.19568	247	2.02785	-2.9014	4.07878	247	2.02785
248	-0.0314789	0.999505	-0.0314737	248	2.04886	0.515723	-0.0844888	248	2.04886	0.348429	-0.160803	248	2.04886	2.02998	0.846302	248	2.04886	2.07617	1.12314	248	2.04886	1.52859	1.06345	248	2.04886	0.144927	-0.161583	248	2.04886	-0.106443	-0.684924	248	2.04886	-0.295789	-0.582618	248	2.04886	-0.325205	-0.924113	248	2.04886	1.8464	1.18544	248	2.04886	-2.93086	4.0825	248	2.04886
249	-0.0188873	0.999822	-0.0188862	249	2.06988	0.500702	-0.0911431	249	2.06988	0.330638	-0.172332	249	2.06988	2.01022	0.833026	249	2.06988	2.05882	1.11235	249	2.06988	1.50994	1.05146	249	2.06988	0.124711	-0.170117	249	2.06988	-0.127345	-0.693784	249	2.06988	-0.316474	-0.589427	249	2.06988	-0.346096	-0.932916	249	2.06988	1.82718	1.17502	249	2.06988	-2.96	4.08564	249	2.06988
250	-0.00629578	0.99998	-0.00629574	250	2.09089	0.485852	-0.0979173	250	2.09089	0.313049	-0.183981	250	2.09089	1.99068	0.819623	250	2.09089	2.04166	1.10147	250	2.09089	1.4915	1.03935	250	2.09089	0.104725	-0.178834	250	2.09089	-0.148009	-0.702785	250	2.09089	-0.336923	-0.59646	250	2.09089	-0.36675	-0.941855	250	2.09089	1.80818	1.16444	250	2.09089	-2.9888	4.0882	250	2.09089
251	0.00629577	0.99998	0.00629573	251	2.11191	0.47118	-0.104808	251	2.11191	0.29567	-0.195742	251	2.11191	1.97137	0.806101	251	2.11191	2.02471	1.09049	251	2.11191	1.47329	1.02715	251	2.11191	0.0849786	-0.18773	251	2.11191	-0.168426	-0.711923	251	2.11191	-0.357127	-0.603711	251	2.11191	-0.387156	-0.950927	251	2.11191	1.7894	1.15369	251	2.11191	-3.01727	4.09017	251	2.11191
252	0.0188873	0.999822	0.0188862	252	2.13292	0.456692	-0.111813	252	2.13292	0.278509	-0.207612	252	2.13292	1.95231	0.792465	252	2.13292	2.00797	1.07941	252	2.13292	1.4553	1.01484	252	2.13292	0.0654797	-0.196802	252	2.13292	-0.188586	-0.721193	252	2.13292	-0.377078	-0.611179	252	2.13292	-0.407307	-0.960128	252	2.13292	1.77086	1.14279	252	2.13292	-3.04537	4.09155	252	2.13292
253	0.0314789	0.999505	0.0314737	253	2.15393	0.442394	-0.118929	253	2.15393	0.261575	-0.219585	253	2.15393	1.93349	0.778721	253	2.15393	1.99146	1.06825	253	2.15393	1.43754	1.00245	253	2.15393	0.0462373	-0.206045	253	2.15393	-0.208482	-0.730591	253	2.15393	-0.396767	-0.61886	253	2.15393	-0.427192	-0.969453	253	2.15393	1.75256	1.13174	253	2.15393	-3.07311	4.09235	253	2.15393
254	0.0440704	0.999029	0.0440562	254	2.17495	0.428293	-0.126152	254	2.17495	0.244873	-0.231655	254	2.17495	1.91494	0.764875	254	2.17495	1.97517	1.057	254	2.17495	1.42003	0.989965	254	2.17495	0.0272597	-0.215456	254	2.17495	-0.228103	-0.740113	254	2.17495	-0.416184	-0.626751	254	2.17495	-0.446803	-0.978899	254	2.17495	1.73452	1.12054	254	2.17495	-3.10046	4.09257	254	2.17495
255	0.056662	0.998395	0.0566317	255	2.19596	0.414396	-0.13348	255	2.19596	0.228412	-0.243818	255	2.19596	1.89665	0.750933	255	2.19596	1.95911	1.04568	255	2.19596	1.40278	0.977402	255	2.19596	0.00855545	-0.22503	255	2.19596	-0.247443	-0.749755	255	2.19596	-0.435322	-0.634847	255	2.19596	-0.466133	-0.988461	255	2.19596	1.71673	1.10919	255	2.19596	-3.12742	4.09219	255	2.19596
256	0.0692535	0.997603	0.0691982	256	2.21698	0.400707	-0.140909	256	2.21698	0.212198	-0.256068	256	2.21698	1.87864	0.736902	256	2.21698	1.94329	1.03428	256	2.21698	1.38578	0.964764	256	2.21698	-0.00986725	-0.234763	256	2.21698	-0.26649	-0.759512	256	2.21698	-0.454172	-0.643146	256	2.21698	-0.485171	-0.998136	256	2.21698	1.69921	1.09771	256	2.21698	-3.15398	4.09123	256	2.21698
257	0.0818451	0.996653	0.0817537	257	2.23799	0.387234	-0.148436	257	2.23799	0.19624	-0.268399	257	2.23799	1.86091	0.722787	257	2.23799	1.92773	1.02281	257	2.23799	1.36905	0.952056	257	2.23799	-0.0280003	-0.24465	257	2.23799	-0.285239	-0.769381	257	2.23799	-0.472725	-0.651644	257	2.23799	-0.50391	-1.00792	257	2.23799	1.68197	1.0861	257	2.23799	-3.18012	4.08969	257	2.23799
258	0.0944366	0.995544	0.0942963	258	2.259	0.373982	-0.156057	258	2.259	0.180543	-0.280806	258	2.259	1.84348	0.708595	258	2.259	1.91242	1.01129	258	2.259	1.3526	0.939284	258	2.259	-0.0458356	-0.254688	258	2.259	-0.303679	-0.779357	258	2.259	-0.490974	-0.660337	258	2.259	-0.522341	-1.0178	258	2.259	1.66501	1.07436	258	2.259	-3.20582	4.08756	258	2.259
259	0.107028	0.994278	0.106824	259	2.28002	0.360957	-0.16377	259	2.28002	0.165116	-0.293285	259	2.28002	1.82634	0.694332	259	2.28002	1.89737	0.999699	259	2.28002	1.33642	0.926454	259	2.28002	-0.0633653	-0.264872	259	2.28002	-0.321804	-0.789435	259	2.28002	-0.50891	-0.669221	259	2.28002	-0.540456	-1.02779	259	2.28002	1.64834	1.0625	259	2.28002	-3.23109	4.08485	259	2.28002
260	0.11962	0.992854	0.119335	260	2.30103	0.348165	-0.171571	260	2.30103	0.149964	-0.305828	260	2.30103	1.80951	0.680005	260	2.30103	1.88259	0.98806	260	2.30103	1.32054	0.91357	260	2.30103	-0.0805817	-0.275197	260	2.30103	-0.339605	-0.799612	260	2.30103	-0.526526	-0.678292	260	2.30103	-0.558248	-1.03787	260	2.30103	1.63197	1.05052	260	2.30103	-3.25591	4.08155	260	2.30103
261	0.132211	0.991273	0.131826	261	2.32205	0.335611	-0.179455	261	2.32205	0.135094	-0.318431	261	2.32205	1.79299	0.665619	261	2.32205	1.86809	0.976373	261	2.32205	1.30495	0.90064	261	2.32205	-0.0974772	-0.28566	261	2.32205	-0.357074	-0.809882	261	2.32205	-0.543813	-0.687547	261	2.32205	-0.575708	-1.04804	261	2.32205	1.6159	1.03844	261	2.32205	-3.28026	4.07767	261	2.32205
262	0.144803	0.989534	0.144297	262	2.34306	0.323302	-0.187421	262	2.34306	0.120514	-0.331088	262	2.34306	1.77679	0.651182	262	2.34306	1.85387	0.964644	262	2.34306	1.28967	0.887668	262	2.34306	-0.114044	-0.296254	262	2.34306	-0.374203	-0.820241	262	2.34306	-0.560764	-0.696981	262	2.34306	-0.592828	-1.0583	262	2.34306	1.60015	1.02624	262	2.34306	-3.30414	4.07321	262	2.34306
263	0.157394	0.987639	0.156745	263	2.36407	0.311241	-0.195464	263	2.36407	0.106229	-0.343793	263	2.36407	1.76092	0.636699	263	2.36407	1.83993	0.952877	263	2.36407	1.27469	0.87466	263	2.36407	-0.130276	-0.306976	263	2.36407	-0.390985	-0.830685	263	2.36407	-0.577372	-0.70659	263	2.36407	-0.609602	-1.06863	263	2.36407	1.58472	1.01394	263	2.36407	-3.32754	4.06818	263	2.36407
264	0.169986	0.985587	0.169169	264	2.38509	0.299436	-0.203581	264	2.38509	0.0922459	-0.356541	264	2.38509	1.74539	0.622177	264	2.38509	1.82629	0.941079	264	2.38509	1.26003	0.861623	264	2.38509	-0.146164	-0.317821	264	2.38509	-0.407413	-0.841209	264	2.38509	-0.593629	-0.716369	264	2.38509	-0.626021	-1.07905	264	2.38509	1.56961	1.00155	264	2.38509	-3.35044	4.06257	264	2.38509
265	0.182578	0.983379	0.181565	265	2.4061	0.28789	-0.211768	265	2.4061	0.0785706	-0.369327	265	2.4061	1.7302	0.607622	265	2.4061	1.81295	0.929254	265	2.4061	1.24569	0.848561	265	2.4061	-0.161703	-0.328783	265	2.4061	-0.423479	-0.851808	265	2.4061	-0.609528	-0.726316	265	2.4061	-0.642079	-1.08953	265	2.4061	1.55483	0.989073	265	2.4061	-3.37284	4.05638	265	2.4061
266	0.195169	0.981015	0.193932	266	2.42712	0.27661	-0.220022	266	2.42712	0.0652093	-0.382144	266	2.42712	1.71535	0.59304	266	2.42712	1.79992	0.917407	266	2.42712	1.23169	0.835481	266	2.42712	-0.176885	-0.339859	266	2.42712	-0.439176	-0.862477	266	2.42712	-0.625062	-0.736424	266	2.42712	-0.657768	-1.10009	266	2.42712	1.5404	0.976508	266	2.42712	-3.39472	4.04963	266	2.42712
267	0.207761	0.978495	0.206269	267	2.44813	0.265599	-0.228339	267	2.44813	0.0521678	-0.394987	267	2.44813	1.70087	0.578439	267	2.44813	1.7872	0.905543	267	2.44813	1.21802	0.822388	267	2.44813	-0.191704	-0.351044	267	2.44813	-0.454498	-0.873212	267	2.44813	-0.640224	-0.74669	267	2.44813	-0.673082	-1.1107	267	2.44813	1.52631	0.963865	267	2.44813	-3.41608	4.04231	267	2.44813
268	0.220352	0.975821	0.218573	268	2.46914	0.254864	-0.236715	268	2.46914	0.039452	-0.40785	268	2.46914	1.68674	0.563825	268	2.46914	1.7748	0.893669	268	2.46914	1.20469	0.809289	268	2.46914	-0.206152	-0.362331	268	2.46914	-0.469437	-0.884009	268	2.46914	-0.655008	-0.757109	268	2.46914	-0.688013	-1.12138	268	2.46914	1.51257	0.951149	268	2.46914	-3.43691	4.03442	268	2.46914
269	0.232944	0.972991	0.230843	269	2.49016	0.244408	-0.245147	269	2.49016	0.0270673	-0.420727	269	2.49016	1.67298	0.549203	269	2.49016	1.76272	0.881788	269	2.49016	1.1917	0.796188	269	2.49016	-0.220224	-0.373717	269	2.49016	-0.483986	-0.894861	269	2.49016	-0.669406	-0.767676	269	2.49016	-0.702555	-1.13211	269	2.49016	1.49919	0.938365	269	2.49016	-3.45719	4.02597	269	2.49016
270	0.245535	0.970007	0.243076	270	2.51117	0.234236	-0.25363	270	2.51117	0.0150194	-0.433614	270	2.51117	1.6596	0.534581	270	2.51117	1.75097	0.869907	270	2.51117	1.17907	0.783092	270	2.51117	-0.233914	-0.385196	270	2.51117	-0.498141	-0.905766	270	2.51117	-0.683413	-0.778387	270	2.51117	-0.716702	-1.14289	270	2.51117	1.48617	0.925519	270	2.51117	-3.47692	4.01697	270	2.51117
271	0.258127	0.96687	0.25527	271	2.53219	0.224353	-0.262162	271	2.53219	0.00331349	-0.446504	271	2.53219	1.6466	0.519965	271	2.53219	1.73955	0.858031	271	2.53219	1.1668	0.770006	271	2.53219	-0.247215	-0.396764	271	2.53219	-0.511893	-0.916717	271	2.53219	-0.697023	-0.789238	271	2.53219	-0.730448	-1.15371	271	2.53219	1.47352	0.912617	271	2.53219	-3.49609	4.00742	271	2.53219
272	0.270718	0.963579	0.267424	272	2.5532	0.214763	-0.270738	272	2.5532	-0.00804524	-0.459391	272	2.5532	1.63398	0.505362	272	2.5532	1.72847	0.846164	272	2.5532	1.15489	0.756937	272	2.5532	-0.260121	-0.408415	272	2.5532	-0.525238	-0.927709	272	2.5532	-0.710228	-0.800223	272	2.5532	-0.743785	-1.16457	272	2.5532	1.46125	0.899665	272	2.5532	-3.5147	3.99731	272	2.5532
273	0.28331	0.960135	0.279535	273	2.57421	0.205471	-0.279355	273	2.57421	-0.0190518	-0.47227	273	2.57421	1.62175	0.490777	273	2.57421	1.71773	0.834312	273	2.57421	1.14335	0.74389	273	2.57421	-0.272628	-0.420144	273	2.57421	-0.538168	-0.938739	273	2.57421	-0.723025	-0.811337	273	2.57421	-0.756709	-1.17546	273	2.57421	1.44936	0.886668	273	2.57421	-3.53272	3.98666	273	2.57421
274	0.295902	0.95654	0.291602	274	2.59523	0.19648	-0.288008	274	2.59523	-0.0297012	-0.485135	274	2.59523	1.60992	0.476217	274	2.59523	1.70735	0.822481	274	2.59523	1.13219	0.73087	274	2.59523	-0.284728	-0.431945	274	2.59523	-0.55068	-0.949801	274	2.59523	-0.735406	-0.822575	274	2.59523	-0.769214	-1.18639	274	2.59523	1.43785	0.873632	274	2.59523	-3.55017	3.97547	274	2.59523
275	0.308493	0.952792	0.303623	275	2.61624	0.187794	-0.296695	275	2.61624	-0.0399889	-0.497981	275	2.61624	1.59849	0.461689	275	2.61624	1.69731	0.810675	275	2.61624	1.12141	0.717885	275	2.61624	-0.296418	-0.443815	275	2.61624	-0.562766	-0.960891	275	2.61624	-0.747366	-0.833934	275	2.61624	-0.781294	-1.19734	275	2.61624	1.42673	0.860563	275	2.61624	-3.56701	3.96375	275	2.61624
276	0.321085	0.948894	0.315596	276	2.63726	0.179418	-0.30541	276	2.63726	-0.0499103	-0.510801	276	2.63726	1.58747	0.4472	276	2.63726	1.68763	0.7989	276	2.63726	1.111	0.704938	276	2.63726	-0.307691	-0.455746	276	2.63726	-0.574422	-0.972003	276	2.63726	-0.758901	-0.845406	276	2.63726	-0.792944	-1.2083	276	2.63726	1.41602	0.847467	276	2.63726	-3.58326	3.9515	276	2.63726
277	0.333676	0.944845	0.327519	277	2.65827	0.171355	-0.314151	277	2.65827	-0.059461	-0.52359	277	2.65827	1.57686	0.432755	277	2.65827	1.67832	0.78716	277	2.65827	1.10099	0.692036	277	2.65827	-0.318543	-0.467735	277	2.65827	-0.585642	-0.983132	277	2.65827	-0.770005	-0.856989	277	2.65827	-0.804159	-1.21929	277	2.65827	1.4057	0.834348	277	2.65827	-3.59891	3.93872	277	2.65827
278	0.346268	0.940646	0.339389	278	2.67928	0.163608	-0.322913	278	2.67928	-0.0686368	-0.536343	278	2.67928	1.56667	0.41836	278	2.67928	1.66937	0.775462	278	2.67928	1.09137	0.679185	278	2.67928	-0.328969	-0.479776	278	2.67928	-0.596422	-0.994274	278	2.67928	-0.780672	-0.868675	278	2.67928	-0.814933	-1.23028	278	2.67928	1.39578	0.821214	278	2.67928	-3.61393	3.92543	278	2.67928
279	0.358859	0.936298	0.351206	279	2.7003	0.156181	-0.331693	279	2.7003	-0.0774336	-0.549054	279	2.7003	1.55689	0.404024	279	2.7003	1.66079	0.763811	279	2.7003	1.08215	0.666391	279	2.7003	-0.338965	-0.491863	279	2.7003	-0.606757	-1.00542	279	2.7003	-0.7909	-0.880461	279	2.7003	-0.825263	-1.24128	279	2.7003	1.38628	0.80807	279	2.7003	-3.62834	3.91162	279	2.7003
280	0.371451	0.931802	0.362968	280	2.72131	0.149078	-0.340486	280	2.72131	-0.0858476	-0.561717	280	2.72131	1.54755	0.38975	280	2.72131	1.65258	0.75221	280	2.72131	1.07333	0.653658	280	2.72131	-0.348525	-0.503991	280	2.72131	-0.616642	-1.01658	280	2.72131	-0.800682	-0.892341	280	2.72131	-0.835143	-1.25228	280	2.72131	1.37719	0.794922	280	2.72131	-3.64212	3.89731	280	2.72131
281	0.384042	0.927158	0.374671	281	2.74233	0.1423	-0.34929	281	2.74233	-0.093875	-0.574326	281	2.74233	1.53863	0.375547	281	2.74233	1.64475	0.740666	281	2.74233	1.06492	0.640993	281	2.74233	-0.357647	-0.516155	281	2.74233	-0.626072	-1.02773	281	2.74233	-0.810014	-0.90431	281	2.74233	-0.844569	-1.26328	281	2.74233	1.36851	0.781775	281	2.74233	-3.65527	3.88249	281	2.74233
282	0.396634	0.922367	0.386316	282	2.76334	0.135852	-0.358099	282	2.76334	-0.101512	-0.586877	282	2.76334	1.53015	0.361419	282	2.76334	1.6373	0.729184	282	2.76334	1.05691	0.628402	282	2.76334	-0.366325	-0.52835	282	2.76334	-0.635045	-1.03887	282	2.76334	-0.818894	-0.916362	282	2.76334	-0.853537	-1.27427	282	2.76334	1.36026	0.768635	282	2.76334	-3.66778	3.86719	282	2.76334
283	0.409225	0.917429	0.397899	283	2.78435	0.129737	-0.36691	283	2.78435	-0.108756	-0.599363	283	2.78435	1.5221	0.347375	283	2.78435	1.63024	0.717769	283	2.78435	1.04932	0.615889	283	2.78435	-0.374555	-0.54057	283	2.78435	-0.643555	-1.05	283	2.78435	-0.827315	-0.928493	283	2.78435	-0.862042	-1.28524	283	2.78435	1.35244	0.755509	283	2.78435	-3.67964	3.85139	283	2.78435
284	0.421817	0.912347	0.409419	284	2.80537	0.123956	-0.375719	284	2.80537	-0.115603	-0.611779	284	2.80537	1.51449	0.333418	284	2.80537	1.62356	0.706425	284	2.80537	1.04214	0.60346	284	2.80537	-0.382336	-0.552809	284	2.80537	-0.651599	-1.06111	284	2.80537	-0.835276	-0.940696	284	2.80537	-0.870083	-1.29619	284	2.80537	1.34504	0.742401	284	2.80537	-3.69086	3.83512	284	2.80537
285	0.434409	0.907119	0.420874	285	2.82638	0.118512	-0.384522	285	2.82638	-0.122051	-0.624119	285	2.82638	1.50733	0.319557	285	2.82638	1.61727	0.695158	285	2.82638	1.03538	0.591122	285	2.82638	-0.389662	-0.565063	285	2.82638	-0.659174	-1.07221	285	2.82638	-0.842772	-0.952967	285	2.82638	-0.877653	-1.30712	285	2.82638	1.33807	0.729319	285	2.82638	-3.70142	3.81837	285	2.82638
286	0.447	0.901748	0.432262	286	2.8474	0.113409	-0.393316	286	2.8474	-0.128096	-0.636379	286	2.8474	1.50061	0.305796	286	2.8474	1.61137	0.683973	286	2.8474	1.02904	0.578878	286	2.8474	-0.39653	-0.577325	286	2.8474	-0.666276	-1.08327	286	2.8474	-0.8498	-0.965299	286	2.8474	-0.884751	-1.31802	286	2.8474	1.33154	0.716266	286	2.8474	-3.71132	3.80116	286	2.8474
287	0.459592	0.896234	0.443582	287	2.86841	0.108647	-0.402096	287	2.86841	-0.133735	-0.648552	287	2.86841	1.49435	0.292143	287	2.86841	1.60587	0.672874	287	2.86841	1.02313	0.566735	287	2.86841	-0.402938	-0.589591	287	2.86841	-0.672901	-1.0943	287	2.86841	-0.856356	-0.977688	287	2.86841	-0.891374	-1.32889	287	2.86841	1.32545	0.70325	287	2.86841	-3.72055	3.78349	287	2.86841
288	0.472183	0.890577	0.454832	288	2.88942	0.10423	-0.410859	288	2.88942	-0.138968	-0.660634	288	2.88942	1.48854	0.278602	288	2.88942	1.60077	0.661867	288	2.88942	1.01764	0.554698	288	2.88942	-0.408883	-0.601855	288	2.88942	-0.679048	-1.1053	288	2.88942	-0.862439	-0.990129	288	2.88942	-0.897517	-1.33972	288	2.88942	1.31979	0.690277	288	2.88942	-3.72912	3.76537	288	2.88942
289	0.484775	0.88478	0.466009	289	2.91044	0.100159	-0.419601	289	2.91044	-0.14379	-0.672618	289	2.91044	1.48318	0.26518	289	2.91044	1.59606	0.650957	289	2.91044	1.01259	0.542773	289	2.91044	-0.414362	-0.614111	289	2.91044	-0.684713	-1.11626	289	2.91044	-0.868045	-1.00261	289	2.91044	-0.903179	-1.35051	289	2.91044	1.31458	0.67735	289	2.91044	-3.73702	3.74681	289	2.91044
290	0.497366	0.878842	0.477113	290	2.93145	0.0964361	-0.428317	290	2.93145	-0.148199	-0.6845	290	2.93145	1.47828	0.251884	290	2.93145	1.59176	0.640147	290	2.93145	1.00797	0.530964	290	2.93145	-0.419373	-0.626355	290	2.93145	-0.689894	-1.12717	290	2.93145	-0.873172	-1.01514	290	2.93145	-0.908357	-1.36125	290	2.93145	1.30982	0.664478	290	2.93145	-3.74424	3.72782	290	2.93145
291	0.509958	0.872765	0.488141	291	2.95247	0.0930626	-0.437005	291	2.95247	-0.152195	-0.696275	291	2.95247	1.47384	0.238718	291	2.95247	1.58787	0.629444	291	2.95247	1.00378	0.519277	291	2.95247	-0.423913	-0.638581	291	2.95247	-0.694588	-1.13803	291	2.95247	-0.877818	-1.0277	291	2.95247	-0.913049	-1.37194	291	2.95247	1.3055	0.651664	291	2.95247	-3.75079	3.7084	291	2.95247
292	0.522549	0.86655	0.499091	292	2.97348	0.0900403	-0.445659	292	2.97348	-0.155775	-0.707936	292	2.97348	1.46987	0.225688	292	2.97348	1.58437	0.618851	292	2.97348	1.00002	0.507717	292	2.97348	-0.427981	-0.650782	292	2.97348	-0.698794	-1.14883	292	2.97348	-0.88198	-1.04029	292	2.97348	-0.917253	-1.38257	292	2.97348	1.30163	0.638915	292	2.97348	-3.75665	3.68856	292	2.97348
293	0.535141	0.860197	0.509962	293	2.99449	0.0873703	-0.454277	293	2.99449	-0.158938	-0.71948	293	2.99449	1.46635	0.212802	293	2.99449	1.58129	0.608374	293	2.99449	0.996709	0.496289	293	2.99449	-0.431575	-0.662955	293	2.99449	-0.702509	-1.15957	293	2.99449	-0.885656	-1.0529	293	2.99449	-0.920966	-1.39313	293	2.99449	1.29822	0.626237	293	2.99449	-3.76183	3.66832	293	2.99449
294	0.547733	0.853707	0.520753	294	3.01551	0.0850539	-0.462854	294	3.01551	-0.161681	-0.730901	294	3.01551	1.4633	0.200063	294	3.01551	1.57861	0.598017	294	3.01551	0.993833	0.484998	294	3.01551	-0.434692	-0.675094	294	3.01551	-0.705733	-1.17025	294	3.01551	-0.888846	-1.06553	294	3.01551	-0.924188	-1.40364	294	3.01551	1.29525	0.613635	294	3.01551	-3.76632	3.64768	294	3.01551
295	0.560324	0.847083	0.531461	295	3.03652	0.0830922	-0.471388	295	3.03652	-0.164005	-0.742193	295	3.03652	1.46072	0.187477	295	3.03652	1.57635	0.587785	295	3.03652	0.991397	0.473849	295	3.03652	-0.437332	-0.687193	295	3.03652	-0.708462	-1.18085	295	3.03652	-0.891548	-1.07818	295	3.03652	-0.926916	-1.41407	295	3.03652	1.29274	0.601114	295	3.03652	-3.77013	3.62665	295	3.03652
296	0.572916	0.840324	0.542084	296	3.05754	0.081486	-0.479873	296	3.05754	-0.165907	-0.753353	296	3.05754	1.45861	0.175051	296	3.05754	1.57449	0.577682	296	3.05754	0.989402	0.462848	296	3.05754	-0.439494	-0.699246	296	3.05754	-0.710698	-1.19139	296	3.05754	-0.89376	-1.09083	296	3.05754	-0.92915	-1.42442	296	3.05754	1.29069	0.588681	296	3.05754	-3.77325	3.60523	296	3.05754
297	0.585507	0.833432	0.552622	297	3.07855	0.0802359	-0.488306	297	3.07855	-0.167388	-0.764374	297	3.07855	1.45696	0.16279	297	3.07855	1.57305	0.567712	297	3.07855	0.98785	0.451998	297	3.07855	-0.441176	-0.71125	297	3.07855	-0.712437	-1.20184	297	3.07855	-0.895481	-1.10348	297	3.07855	-0.930889	-1.43469	297	3.07855	1.28909	0.57634	297	3.07855	-3.77567	3.58345	297	3.07855
298	0.598099	0.826408	0.563072	298	3.09956	0.0793427	-0.496684	298	3.09956	-0.168446	-0.775253	298	3.09956	1.45579	0.150699	298	3.09956	1.57201	0.55788	298	3.09956	0.986741	0.441305	298	3.09956	-0.442379	-0.723197	298	3.09956	-0.71368	-1.21221	298	3.09956	-0.896711	-1.11612	298	3.09956	-0.932131	-1.44488	298	3.09956	1.28794	0.564097	298	3.09956	-3.7774	3.5613	298	3.09956
299	0.61069	0.819252	0.573433	299	3.12058	0.0788065	-0.505003	299	3.12058	-0.169081	-0.785984	299	3.12058	1.45508	0.138783	299	3.12058	1.57139	0.548191	299	3.12058	0.986075	0.430773	299	3.12058	-0.4431	-0.735084	299	3.12058	-0.714426	-1.22249	299	3.12058	-0.897449	-1.12876	299	3.12058	-0.932877	-1.45498	299	3.12058	1.28726	0.551957	299	3.12058	-3.77844	3.53881	299	3.12058
300	0.623282	0.811967	0.583703	300	3.14159	0.0786278	-0.513259	300	3.14159	-0.169293	-0.796562	300	3.14159	1.45485	0.127048	300	3.14159	1.57119	0.538649	300	3.14159	0.985853	0.420407	300	3.14159	-0.443341	-0.746904	300	3.14159	-0.714675	-1.23267	300	3.14159	-0.897695	-1.14138	300	3.14159	-0.933126	-1.46499	300	3.14159	1.28703	0.539927	300	3.14159	-3.77879	3.51597	300	3.14159
301	0.635873	0.804553	0.59388
302	0.648465	0.797012	0.603964
303	0.661057	0.789344	0.613951
304	0.673648	0.781551	0.623841
305	0.68624	0.773634	0.633633
306	0.698831	0.765595	0.643323
307	0.711423	0.757434	0.652912
308	0.724014	0.749153	0.662397
309	0.736606	0.740753	0.671778
310	0.749197	0.732236	0.681051
311	0.761789	0.723602	0.690217
312	0.774381	0.714854	0.699273
313	0.786972	0.705993	0.708219
314	0.799564	0.69702	0.717052
315	0.812155	0.687936	0.725772
316	0.824747	0.678743	0.734376
317	0.837338	0.669442	0.742864
318	0.84993	0.660036	0.751234
319	0.862521	0.650525	0.759485
320	0.875113	0.64091	0.767616
321	0.887705	0.631194	0.775625
322	0.900296	0.621378	0.783511
323	0.912888	0.611463	0.791273
324	0.925479	0.601452	0.798909
325	0.938071	0.591345	0.806419
326	0.950662	0.581144	0.813801
327	0.963254	0.570851	0.821053
328	0.975845	0.560468	0.828176
329	0.988437	0.549996	0.835167
330	1.00103	0.539437	0.842026
331	1.01362	0.528792	0.848752
332	1.02621	0.518063	0.855343
333	1.0388	0.507252	0.861798
334	1.05139	0.496361	0.868116
335	1.06399	0.485391	0.874297
336	1.07658	0.474344	0.88034
337	1.08917	0.463222	0.886242
338	1.10176	0.452026	0.892005
339	1.11435	0.440759	0.897626
340	1.12694	0.429422	0.903104
341	1.13954	0.418016	0.908439
342	1.15213	0.406545	0.913631
343	1.16472	0.395009	0.918677
344	1.17731	0.38341	0.923578
345	1.1899	0.371751	0.928332
346	1.20249	0.360033	0.93294
347	1.21508	0.348257	0.937399
348	1.22768	0.336427	0.94171
349	1.24027	0.324543	0.945871
350	1.25286	0.312607	0.949882
351	1.26545	0.300622	0.953743
352	1.27804	0.28859	0.957453
353	1.29063	0.276511	0.961011
354	1.30323	0.264389	0.964416
355	1.31582	0.252225	0.967669
356	1.32841	0.240021	0.970768
357	1.341	0.227779	0.973713
358	1.35359	0.2155	0.976504
359	1.36618	0.203188	0.97914
360	1.37878	0.190843	0.981621
361	1.39137	0.178468	0.983946
362	1.40396	0.166065	0.986115
363	1.41655	0.153636	0.988128
364	1.42914	0.141182	0.989984
365	1.44173	0.128705	0.991683
366	1.45432	0.116209	0.993225
367	1.46692	0.103694	0.994609
368	1.47951	0.091162	0.995836
369	1.4921	0.078616	0.996905
370	1.50469	0.0660575	0.997816
371	1.51728	0.0534886	0.998568
372	1.52987	0.0409111	0.999163
373	1.54247	0.0283272	0.999599
374	1.55506	0.0157388	0.999876
375	1.56765	0.00314789	0.999995
376	1.58024	-0.00944352	0.999955
377	1.59283	-0.0220334	0.999757
378	1.60542	-0.0346198	0.999401
379	1.61801	-0.0472008	0.998885
380	1.63061	-0.0597742	0.998212
381	1.6432	-0.0723382	0.99738
382	1.65579	-0.0848907	0.99639
383	1.66838	-0.0974297	0.995242
384	1.68097	-0.109953	0.993937
385	1.69356	-0.122459	0.992474
386	1.70616	-0.134946	0.990853
387	1.71875	-0.147412	0.989075
388	1.73134	-0.159854	0.987141
389	1.74393	-0.17227	0.98505
390	1.75652	-0.18466	0.982803
391	1.76911	-0.19702	0.9804
392	1.7817	-0.209348	0.977841
393	1.7943	-0.221644	0.975128
394	1.80689	-0.233904	0.97226
395	1.81948	-0.246128	0.969237
396	1.83207	-0.258312	0.966061
397	1.84466	-0.270456	0.962732
398	1.85725	-0.282556	0.959251
399	1.86985	-0.294612	0.955617
400	1.88244	-0.306621	0.951832
401	1.89503	-0.318581	0.947896
402	1.90762	-0.330491	0.943809
403	1.92021	-0.342349	0.939573
404	1.9328	-0.354152	0.935188
405	1.9454	-0.365899	0.930655
406	1.95799	-0.377588	0.925974
407	1.97058	-0.389217	0.921146
408	1.98317	-0.400785	0.916172
409	1.99576	-0.412289	0.911053
410	2.00835	-0.423727	0.90579
411	2.02094	-0.435099	0.900383
412	2.03354	-0.446401	0.894833
413	2.04613	-0.457633	0.889141
414	2.05872	-0.468792	0.883309
415	2.07131	-0.479877	0.877336
416	2.0839	-0.490885	0.871224
417	2.09649	-0.501816	0.864974
418	2.10909	-0.512668	0.858587
419	2.12168	-0.523438	0.852064
420	2.13427	-0.534125	0.845406
421	2.14686	-0.544727	0.838613
422	2.15945	-0.555243	0.831688
423	2.17204	-0.565671	0.824631
424	2.18463	-0.576009	0.817443
425	2.19723	-0.586256	0.810126
426	2.20982	-0.59641	0.80268
427	2.22241	-0.60647	0.795107
428	2.235	-0.616433	0.787407
429	2.24759	-0.626298	0.779583
430	2.26018	-0.636065	0.771636
431	2.27278	-0.64573	0.763566
432	2.28537	-0.655293	0.755375
433	2.29796	-0.664752	0.747064
434	2.31055	-0.674106	0.738635
435	2.32314	-0.683353	0.730088
436	2.33573	-0.692491	0.721426
437	2.34832	-0.70152	0.71265
438	2.36092	-0.710438	0.70376
439	2.37351	-0.719243	0.694759
440	2.3861	-0.727933	0.685648
441	2.39869	-0.736509	0.676428
442	2.41128	-0.744968	0.667101
443	2.42387	-0.753308	0.657668
444	2.43647	-0.761529	0.648131
445	2.44906	-0.76963	0.638491
446	2.46165	-0.777608	0.628749
447	2.47424	-0.785463	0.618909
448	2.48683	-0.793194	0.60897
449	2.49942	-0.800798	0.598934
450	2.51201	-0.808276	0.588803
451	2.52461	-0.815626	0.57858
452	2.5372	-0.822846	0.568264
453	2.54979	-0.829936	0.557858
454	2.56238	-0.836895	0.547364
455	2.57497	-0.84372	0.536783
456	2.58756	-0.850412	0.526117
457	2.60016	-0.856969	0.515368
458	2.61275	-0.86339	0.504537
459	2.62534	-0.869675	0.493626
460	2.63793	-0.875821	0.482636
461	2.65052	-0.881828	0.47157
462	2.66311	-0.887696	0.46043
463	2.67571	-0.893423	0.449216
464	2.6883	-0.899009	0.437931
465	2.70089	-0.904451	0.426577
466	2.71348	-0.909751	0.415155
467	2.72607	-0.914906	0.403667
468	2.73866	-0.919916	0.392115
469	2.75125	-0.92478	0.380501
470	2.76385	-0.929498	0.368827
471	2.77644	-0.934068	0.357094
472	2.78903	-0.938491	0.345305
473	2.80162	-0.942764	0.333461
474	2.81421	-0.946888	0.321564
475	2.8268	-0.950862	0.309616
476	2.8394	-0.954685	0.297619
477	2.85199	-0.958357	0.285574
478	2.86458	-0.961876	0.273485
479	2.87717	-0.965244	0.261352
480	2.88976	-0.968458	0.249178
481	2.90235	-0.971518	0.236964
482	2.91494	-0.974425	0.224712
483	2.92754	-0.977177	0.212425
484	2.94013	-0.979775	0.200105
485	2.95272	-0.982216	0.187752
486	2.96531	-0.984503	0.17537
487	2.9779	-0.986633	0.16296
488	2.99049	-0.988606	0.150524
489	3.00309	-0.990423	0.138065
490	3.01568	-0.992083	0.125583
491	3.02827	-0.993586	0.113082
492	3.04086	-0.994931	0.100562
493	3.05345	-0.996118	0.0880268
494	3.06604	-0.997148	0.0754775
495	3.07863	-0.998019	0.0629162
496	3.09123	-0.998732	0.0503449
497	3.10382	-0.999287	0.0377657
498	3.11641	-0.999683	0.0251805
499	3.129	-0.999921	0.0125912
500	3.14159	-1	1.08898e-08
[truncated: 18 more columns]

## Sheet: Sheet3_HID1_HID
1.95385	0.240392	0.452159	-0.296615
0.534618	1.6	0.426244	-0.311942
1.9639	0.345368	1.43427	0.390418
1.27664	1.41177	1.36205	0.695152
1.54407	-1.19504	1.03877	0.592454
1.48877	-1.31682	0.372141	-0.457398
		0.229397	-0.734285
		0.152077	-0.820974
		0.0780387	-0.933796
		1.23266	0.608224
		-1.14386	1.90707
		-1.77553	2.09504
		-0.303919	0.277495
		-0.905125	-0.171686
		-1.34233	-1.43874
		-1.30704	-1.40042

## Sheet: Sheet3_HID
0.941869	0.115883
0.257717	0.771294
0.946714	0.166487
0.615414	0.680555
0.744333	-0.576078
0.717673	-0.634784

[truncated: 50 more sheets: PCA OEO,EEO,REO1-2, AHC1, PCA CEO1-3, XLSTAT_20230521_160005_1_HID, Sheet10_HID4, Sheet10_HID3, Sheet10_HID2, Sheet10_HID1, Sheet10_HID1_HID, Sheet10_HID, Sheet9_HID4, Sheet9_HID3, Sheet9_HID2, Sheet9_HID1, Sheet9_HID1_HID, Sheet9_HID, PCA PEO1-4, Sheet22_HID4, Sheet22_HID3, Sheet22_HID2 …]
